# Supplementary material for: Coordination polymers and molecular complexes of group 13 metal halides with bis-pyridylethane: comparison with rigid N-containing ligands
Source: Royal Society of Chemistry journal article supplement (doi:10.1039/d2ce01063a), 2022-01-01
Supplement: d2ce01063a1.pdf [file d2ce01063a1.pdf]

## Supplementary information

For the manuscript “Coordination Polymers and molecular complexes of Group 13 Metal Halides with Bis-pyridylethane: comparison with rigid N-containing ligands” by Nikita Y. Gugin,<sup>a</sup> Alexander V. Virovets,<sup>b</sup> Eugenia Peresypkina,<sup>c</sup> Elena I. Davydova,<sup>a</sup> and Alexey Y. Timoshkin<sup>a</sup>

- [a] Institute of Chemistry, Saint Petersburg State University, Universitetskaya nab. 7/9, 199034 St. Petersburg, Russia
- [b] Institute of Inorganic Chemistry, Goethe-University Frankfurt am Main, Max-von-Laue-Straße 7, 60438 Frankfurt am Main, Germany
- [c] University of Regensburg, Universitaetsstr. 31, 93053 Regensburg, Germany.

## Contents

|                                                                                                                                |         |
|--------------------------------------------------------------------------------------------------------------------------------|---------|
| The system for synthesis of complexes .....                                                                                    | S2      |
| Powder diffraction measurements .....                                                                                          | S3-S7   |
| Infrared spectra .....                                                                                                         | S8-S11  |
| Mass spectrometry .....                                                                                                        | S12     |
| Intermolecular contacts in <b>1-8</b> .....                                                                                    | S13-S16 |
| Modulation in the crystal structure of [AlBr <sub>2</sub> (bpa) <sub>2</sub> ] <sup>+</sup> Br <sup>-</sup> ( <b>3</b> ) ..... | S17-S19 |
| Simultaneous TG/DSC study .....                                                                                                | S19-S25 |
| Computational data .....                                                                                                       | S26-S64 |

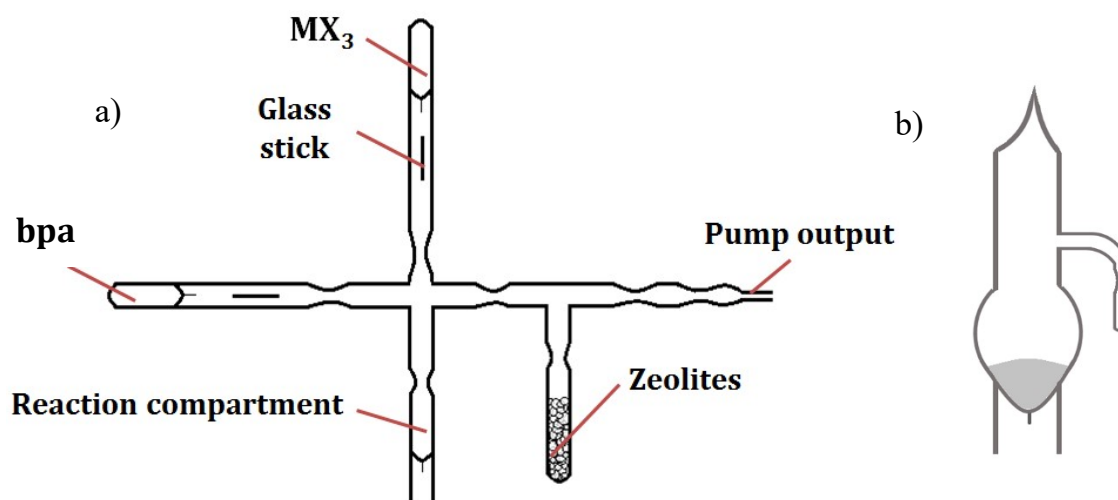

**Fig. S1** a) A schematic view of the system for synthesis; b) A sealed glass ampoule with the reagent mixture and a compartment for the excess reagent (optional).

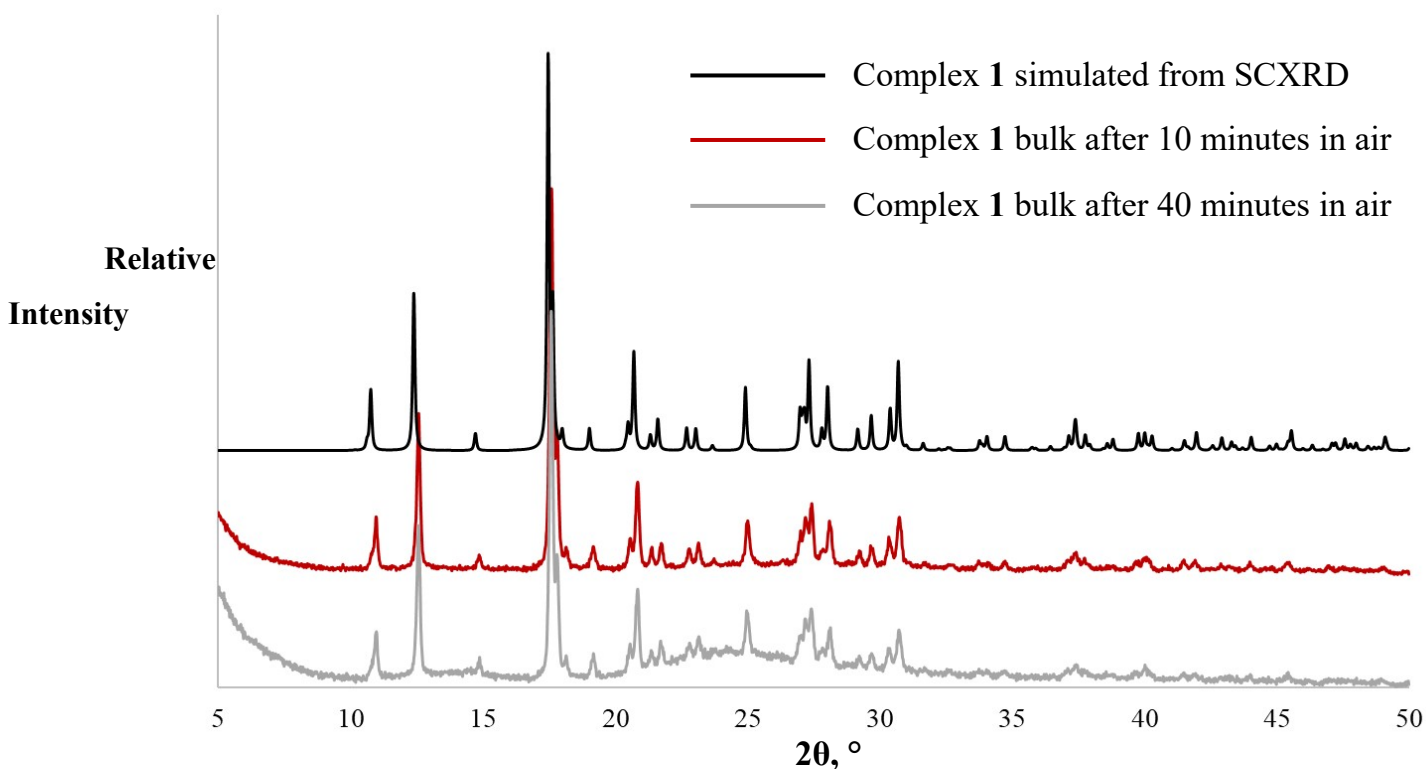

**Fig. S2** Comparison of the simulated (black) and experimental diffraction patterns of **1** after 10 (red) and 40 minutes (grey) in air (Cu-K $\alpha$ 1 = 154.1 pm).

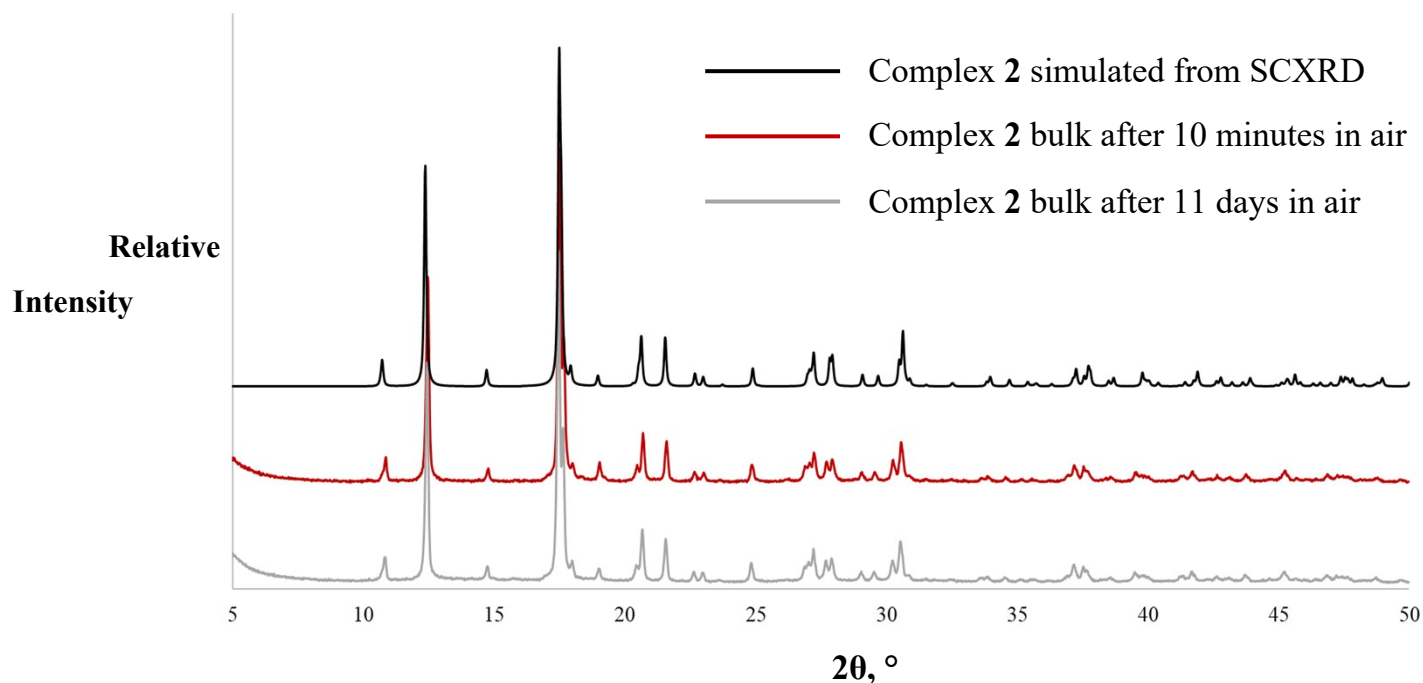

**Fig. S3** Comparison of the simulated (black) and experimental diffraction patterns of **2** after 10 minutes (red) and 11 days (grey) in air (Cu-K $\alpha$ 1 = 154.1 pm).

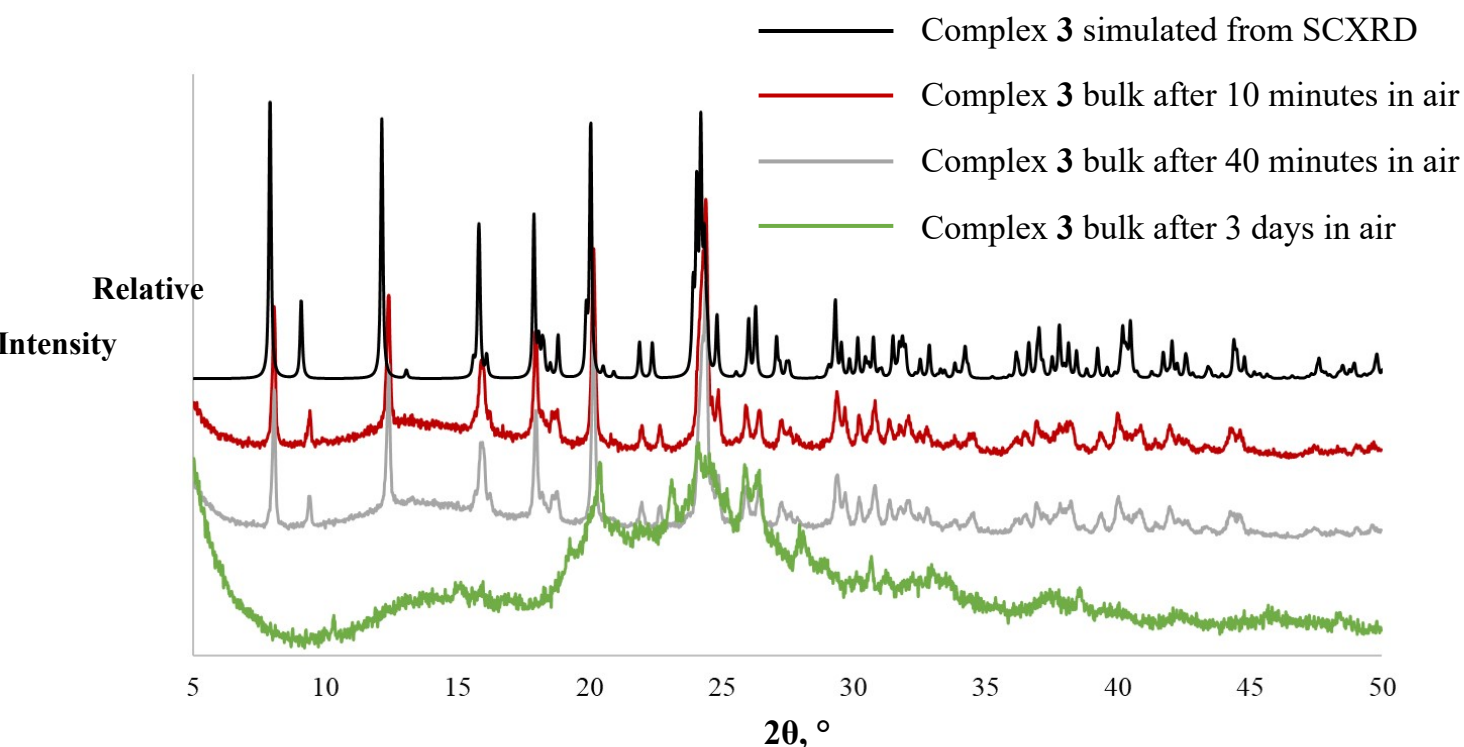

**Fig. S4** Comparison of the simulated (black) and experimental diffraction patterns of **3** after 10 minutes (red), 40 minutes (grey) and 3 days (green) in air (Cu-K $\alpha$ 1 = 154.1 pm).

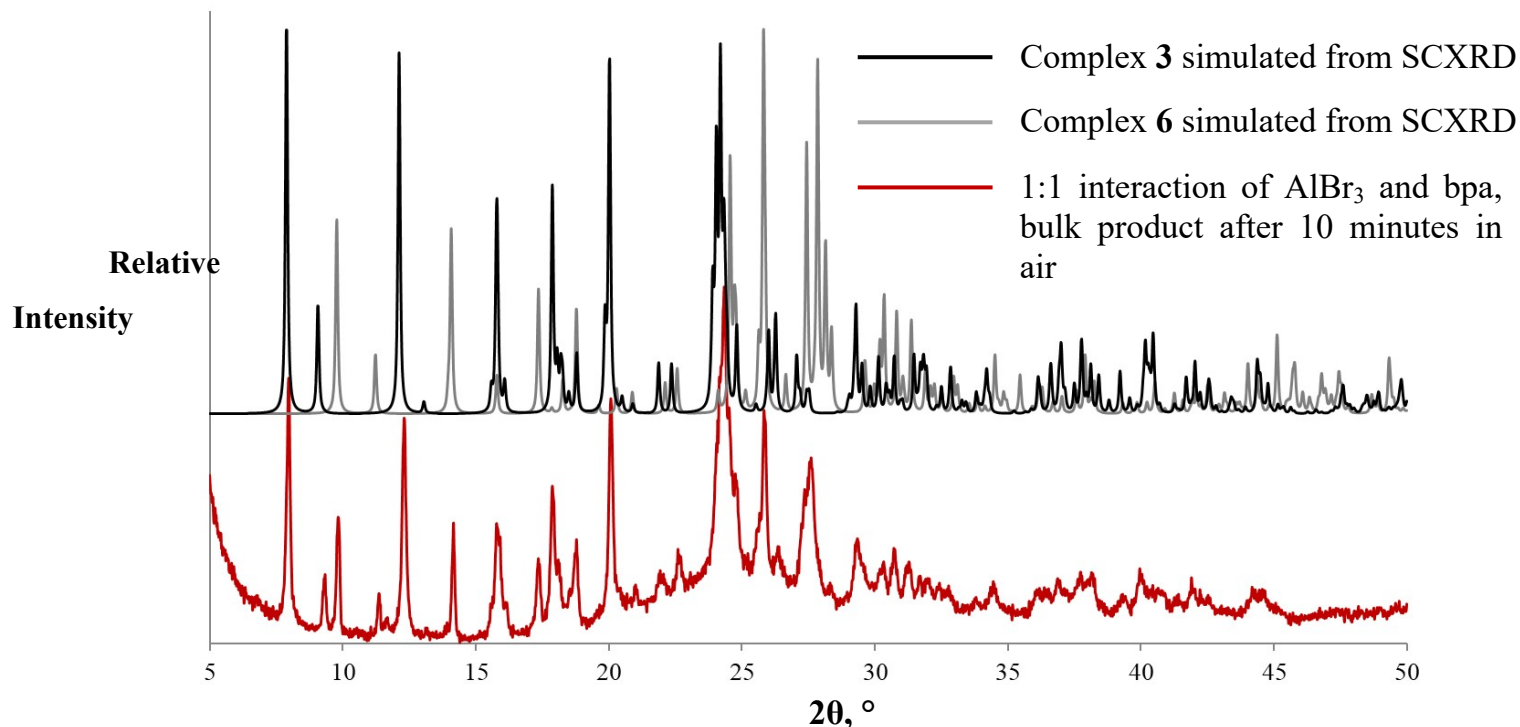

**Fig. S5** Comparison of the experimental diffraction patterns of the bulk product of the 1:1 interaction of AlBr<sub>3</sub> and bpa after 10 minutes in air (red, bottom) and simulated diffraction patterns of **3** (black, top) and **6** (grey, top) (Cu-K $\alpha$ 1 = 154.1 pm).

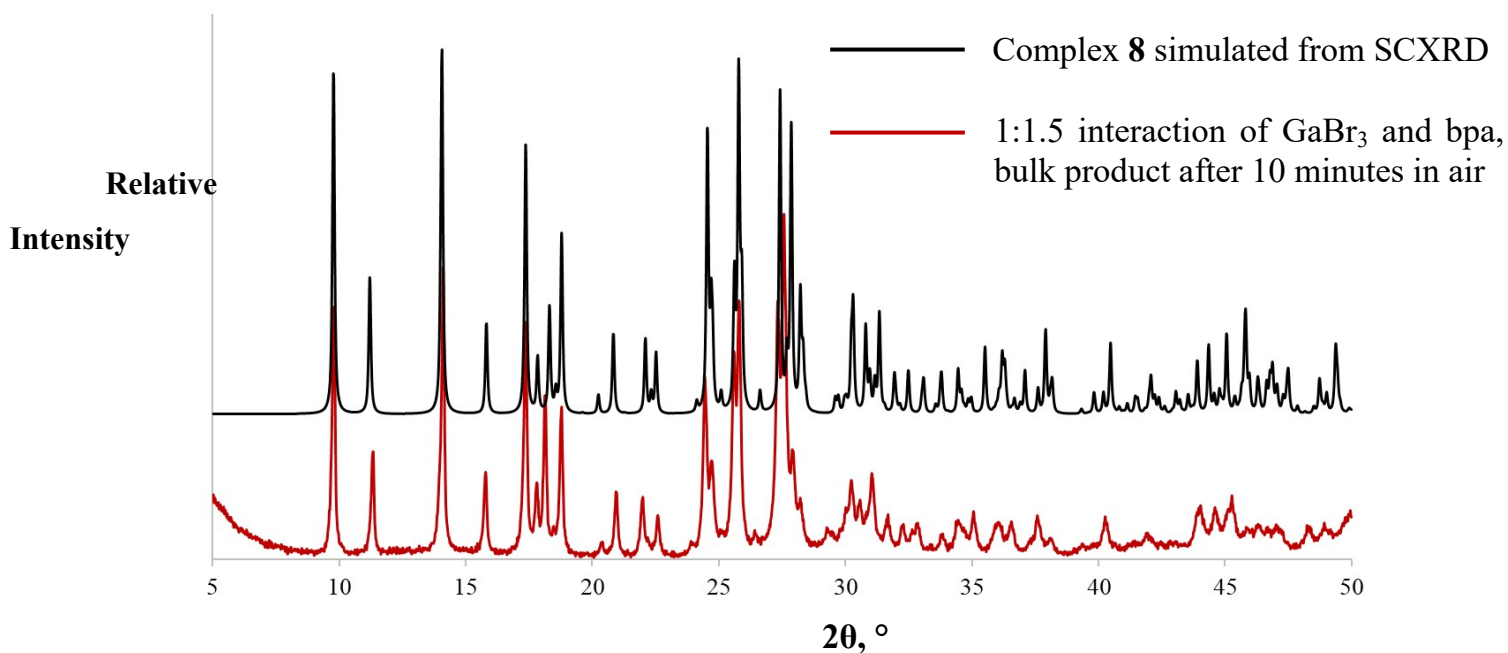

**Fig. S6** Comparison of the experimental diffraction patterns of the bulk product of the 1:1.5 interaction of GaBr<sub>3</sub> and bpa after 10 minutes in air (red, bottom) and simulated diffraction patterns of **8** (black, top) (Cu-Kα1 = 154.1 pm).

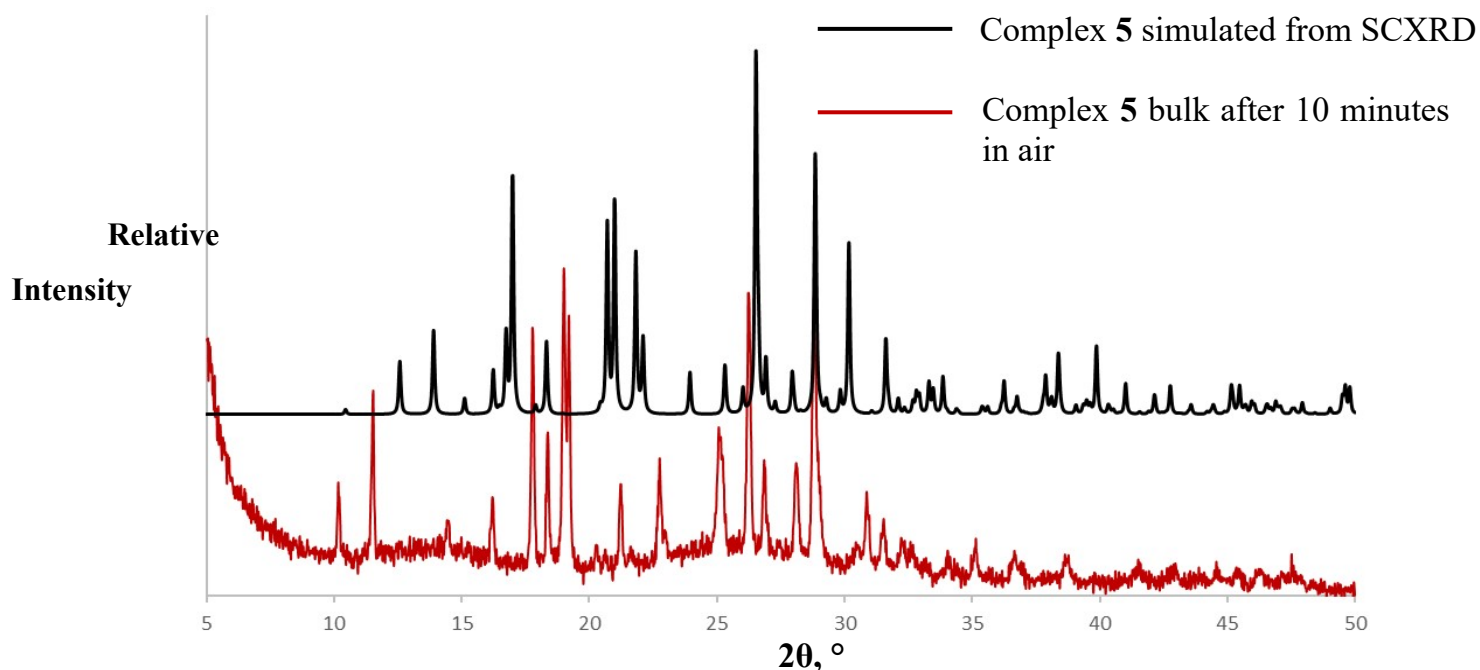

**Fig. S7** Comparison of the simulated (black, top) and experimental (red, bottom) diffraction pattern of **5** after 10 minutes in air (Cu-Kα1 = 154.1 pm).

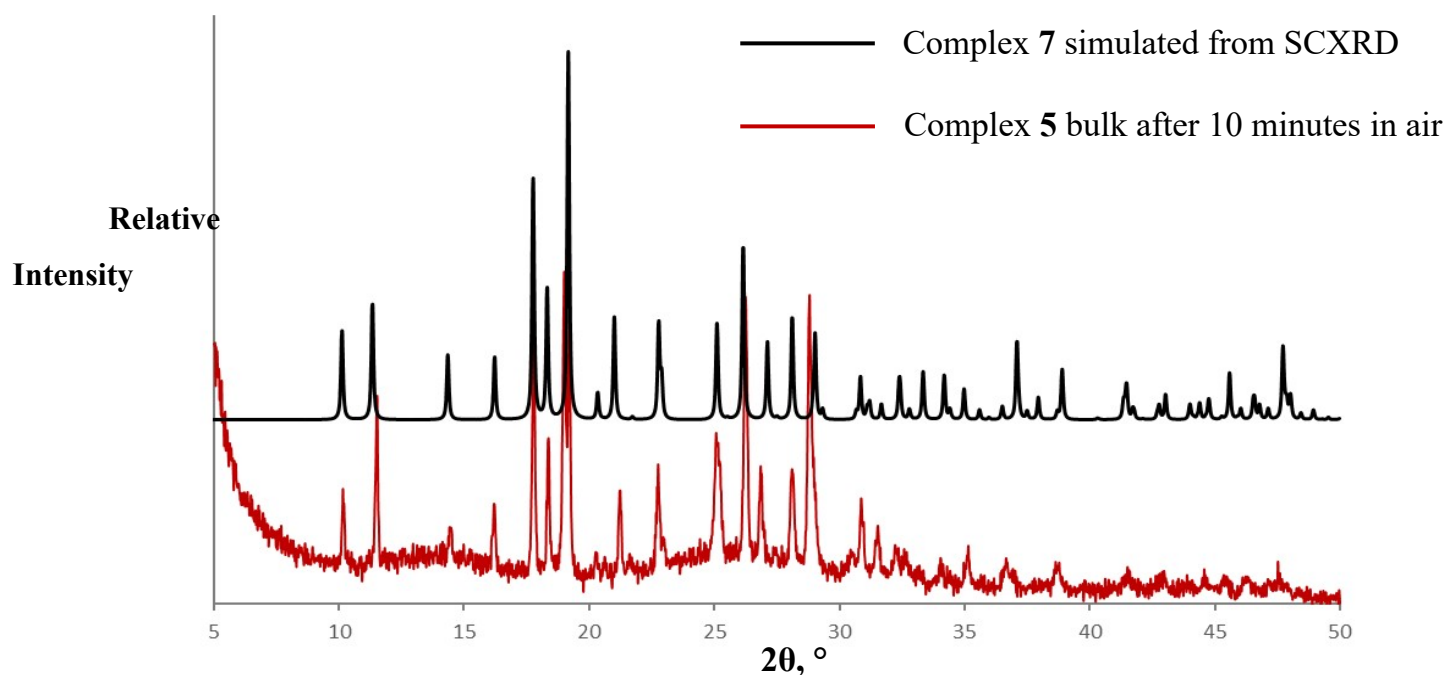

**Fig. S8** Comparison of the simulated diffraction pattern of **7** (black, top) and of the experimental diffraction pattern of **5** (red, bottom) after 10 minutes in air (Cu-K $\alpha$ 1 = 154.1 pm).

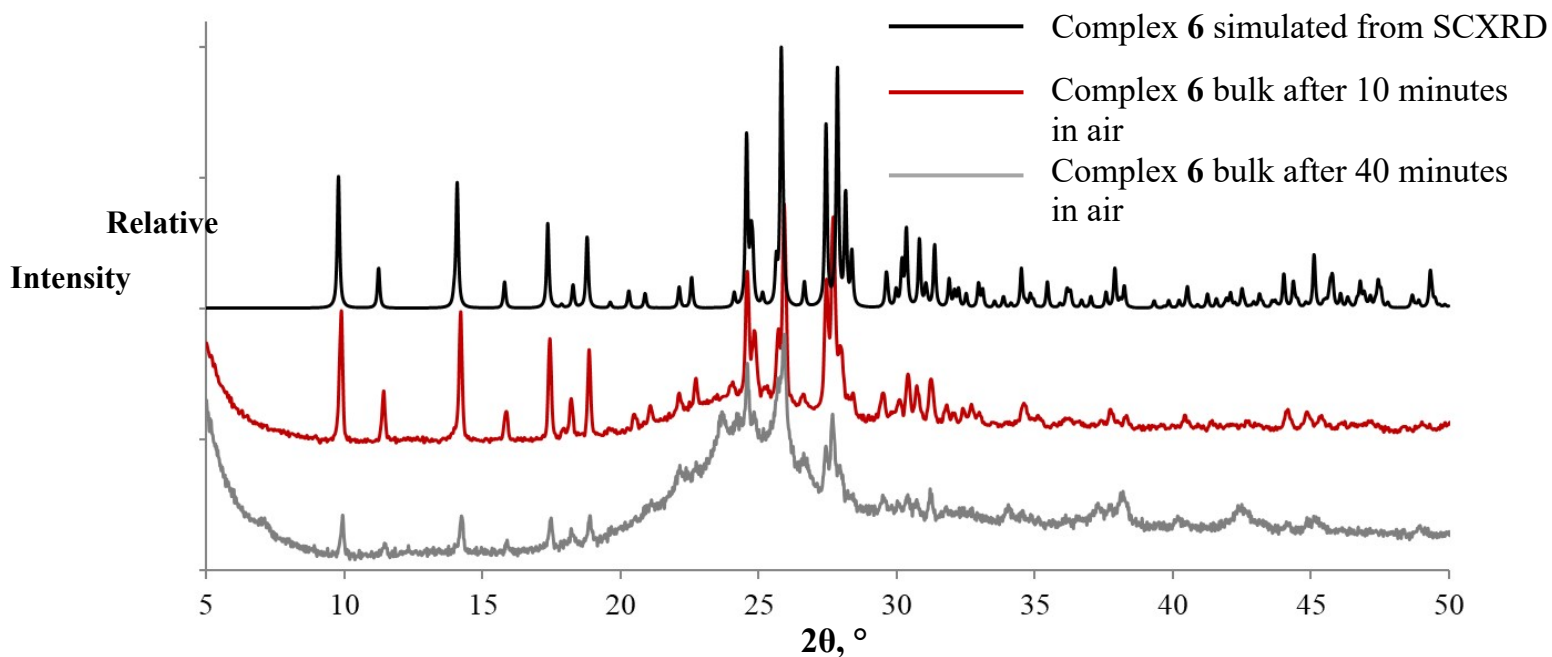

**Fig. S9** Comparison of the simulated (black) and experimental diffraction patterns of **6** after 10 (red) and 40 minutes (grey) in air (Cu-K $\alpha$ 1 = 154.1 pm).

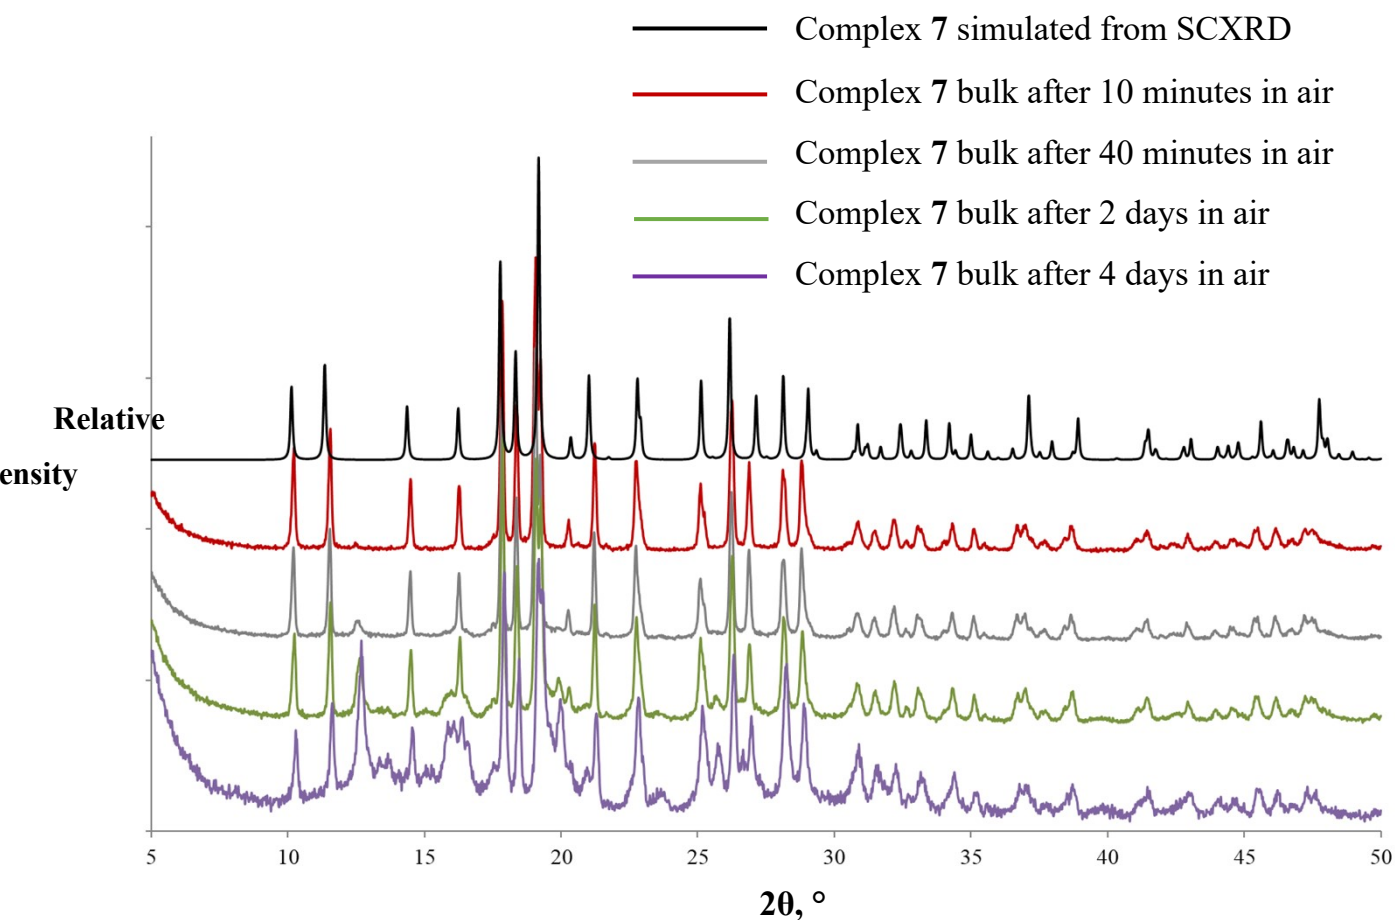

**Fig. S10** Comparison of the simulated (black) and experimental diffraction patterns of **7** after 10 minutes (red), 40 minutes (grey), 2 days (green) and 4 days (purple) in air (Cu-K $\alpha$ 1 = 154.1 pm).

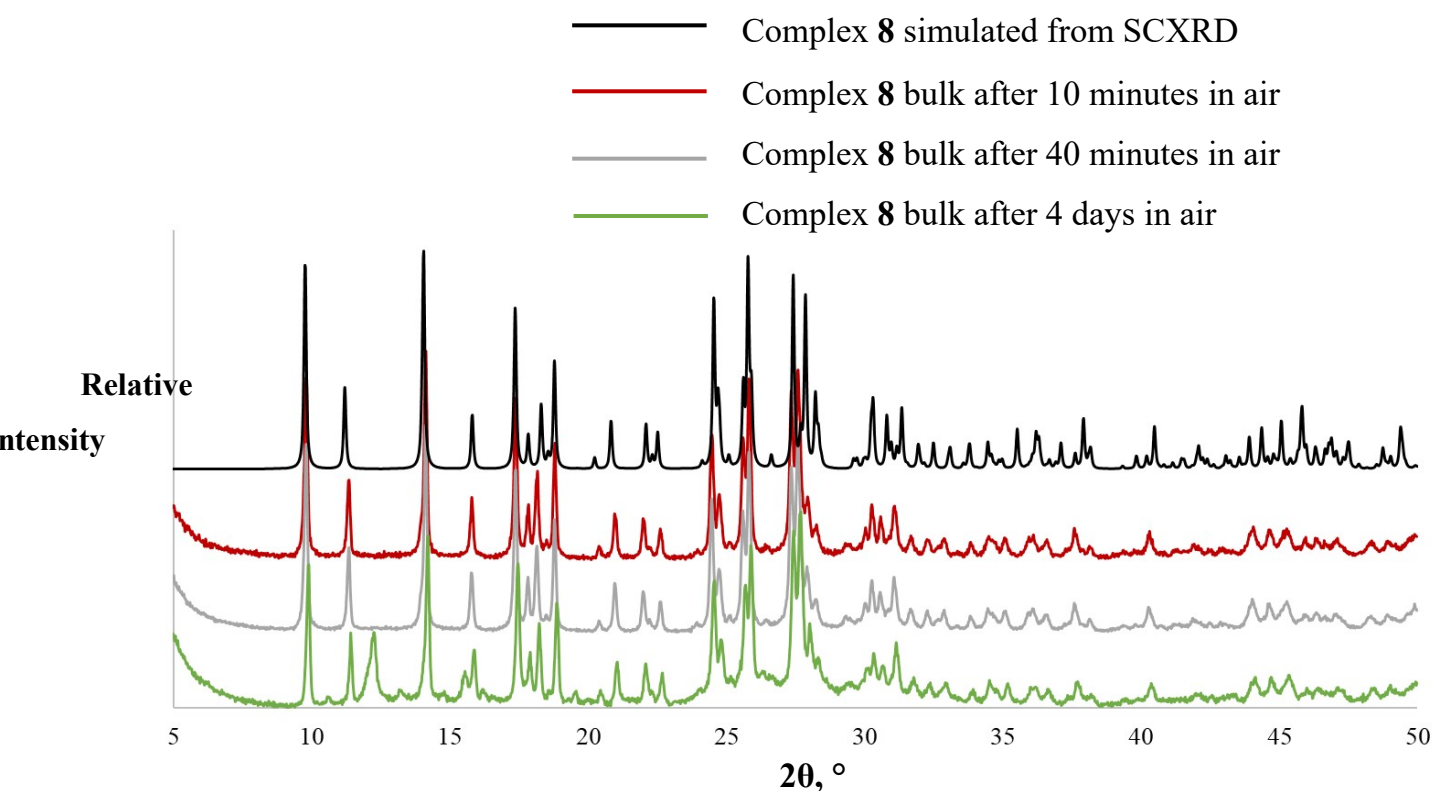

**Fig. S11** Comparison of the simulated (black) and experimental diffraction patterns of **8** after 10 minutes (red), 40 minutes (grey) and 4 days (green) in air (Cu-K $\alpha$ 1 = 154.1 pm).

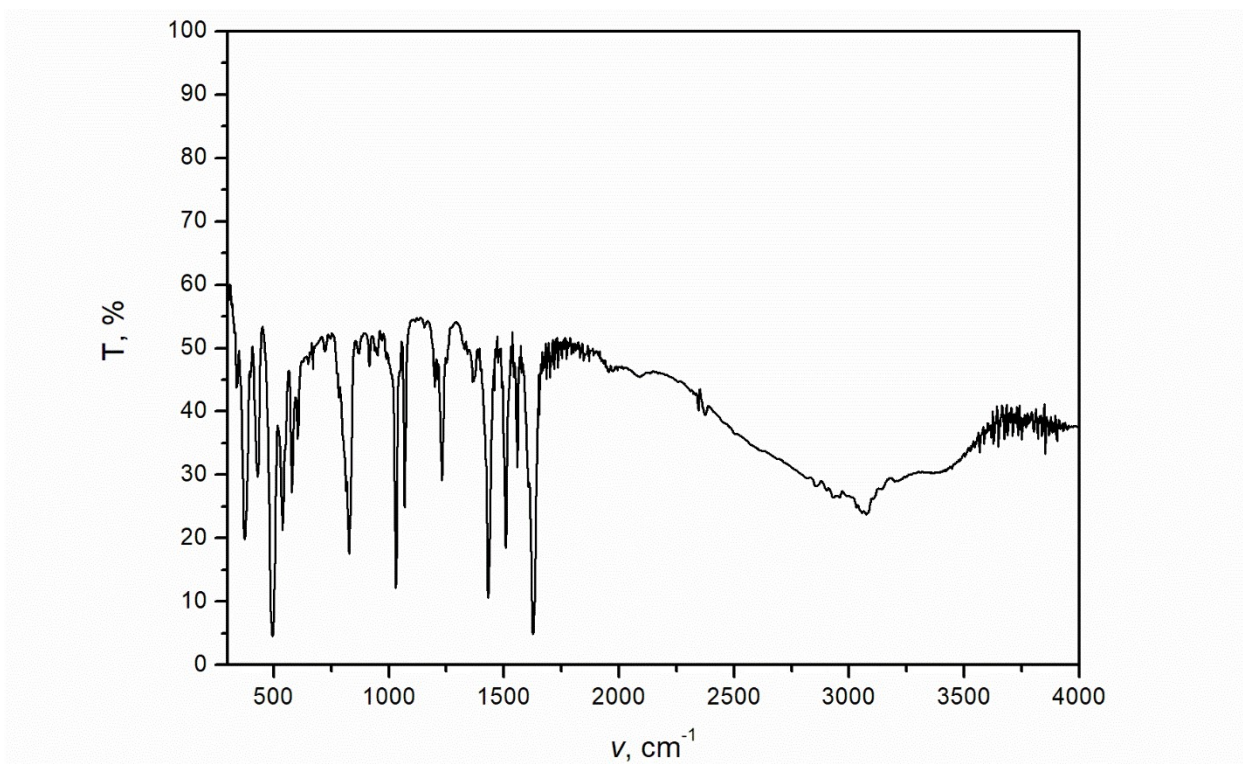

**Fig. S12** IR spectrum of **1**.

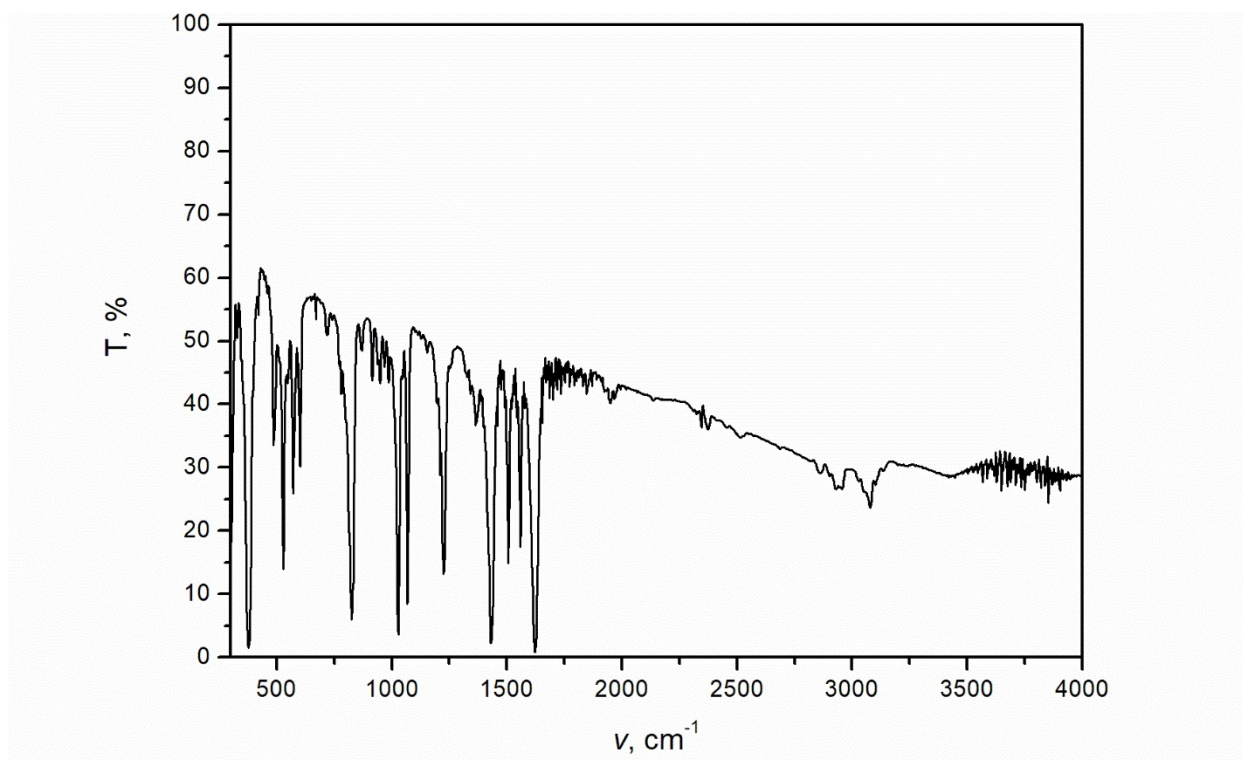

**Fig. S13** IR spectrum of **2**.



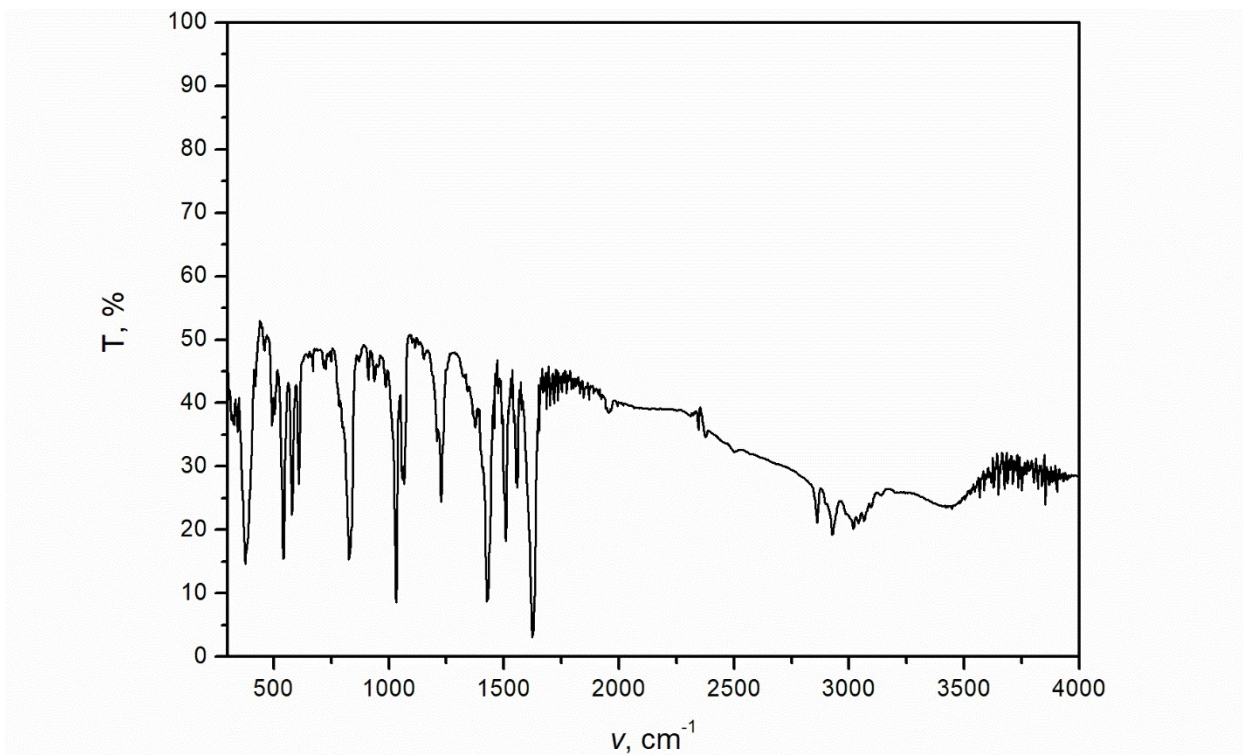

**Fig. S14** IR spectrum of **3**.

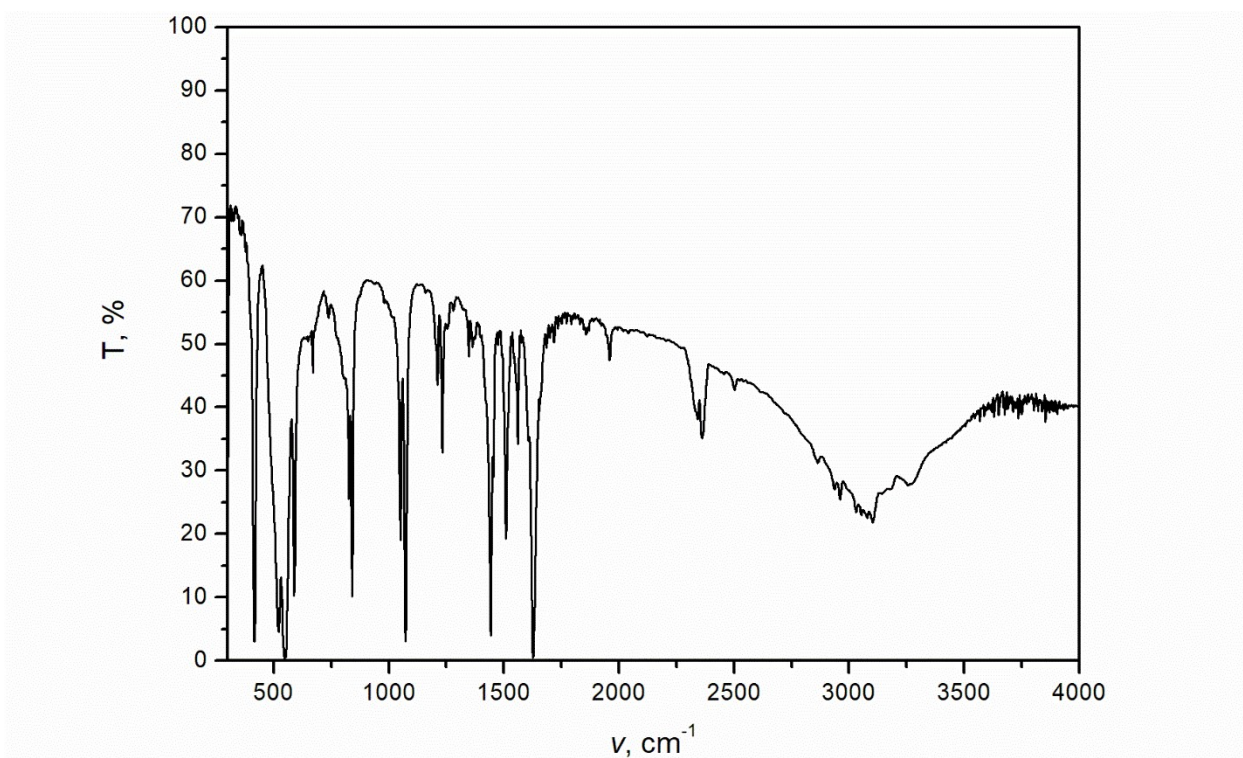

**Fig. S15** IR spectrum of **5**.

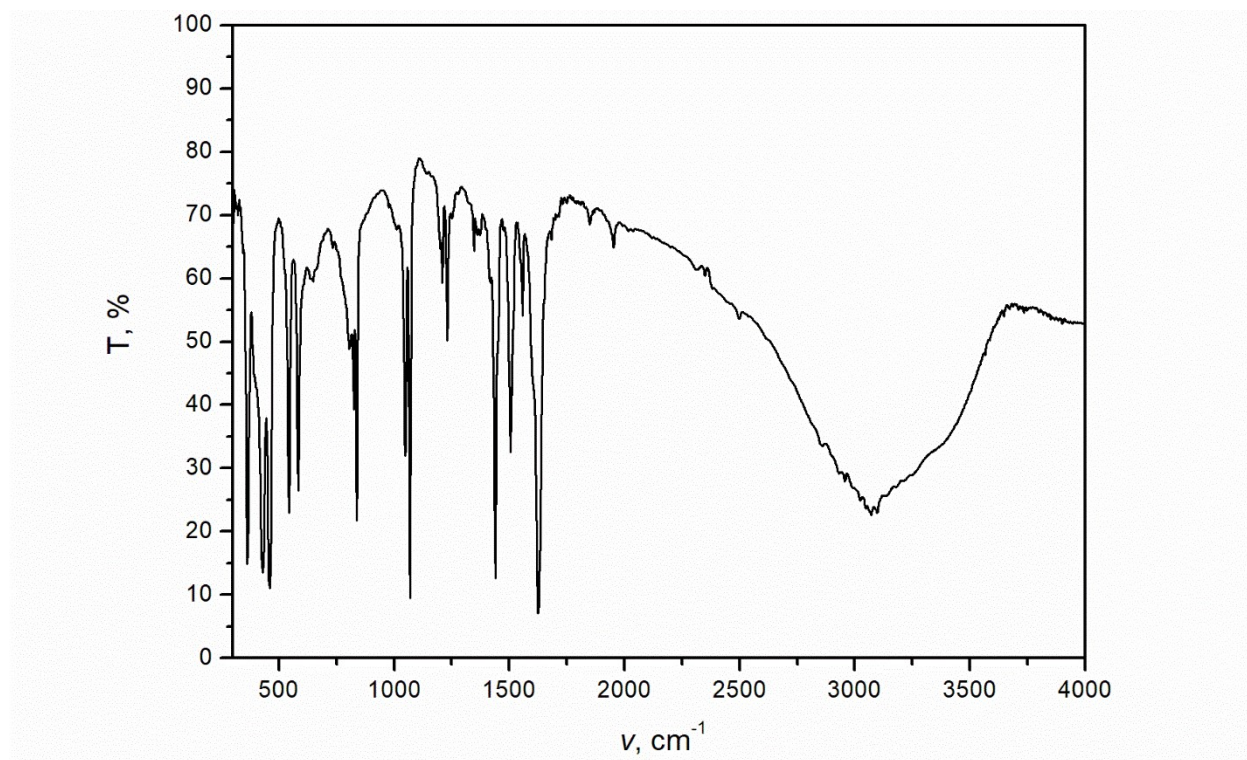

**Fig. S16** IR spectrum of **6**.

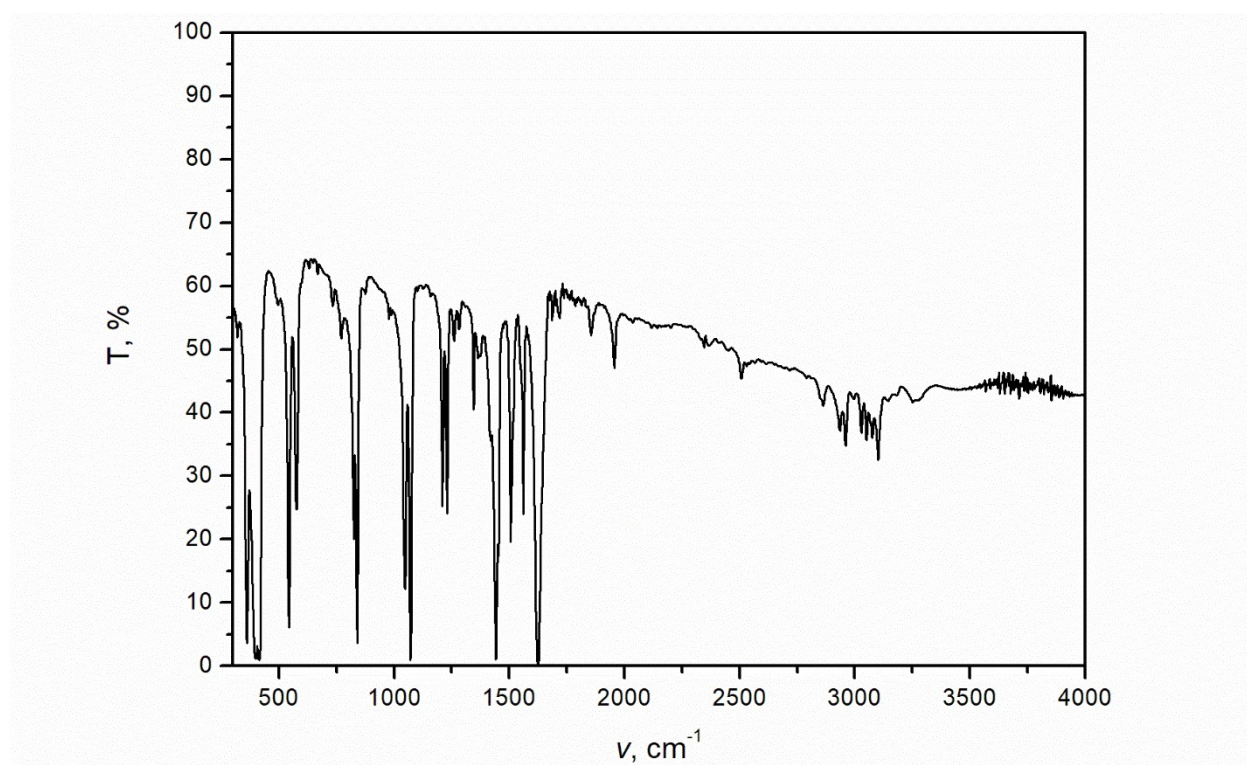

**Fig. S17** IR spectrum of **7**.

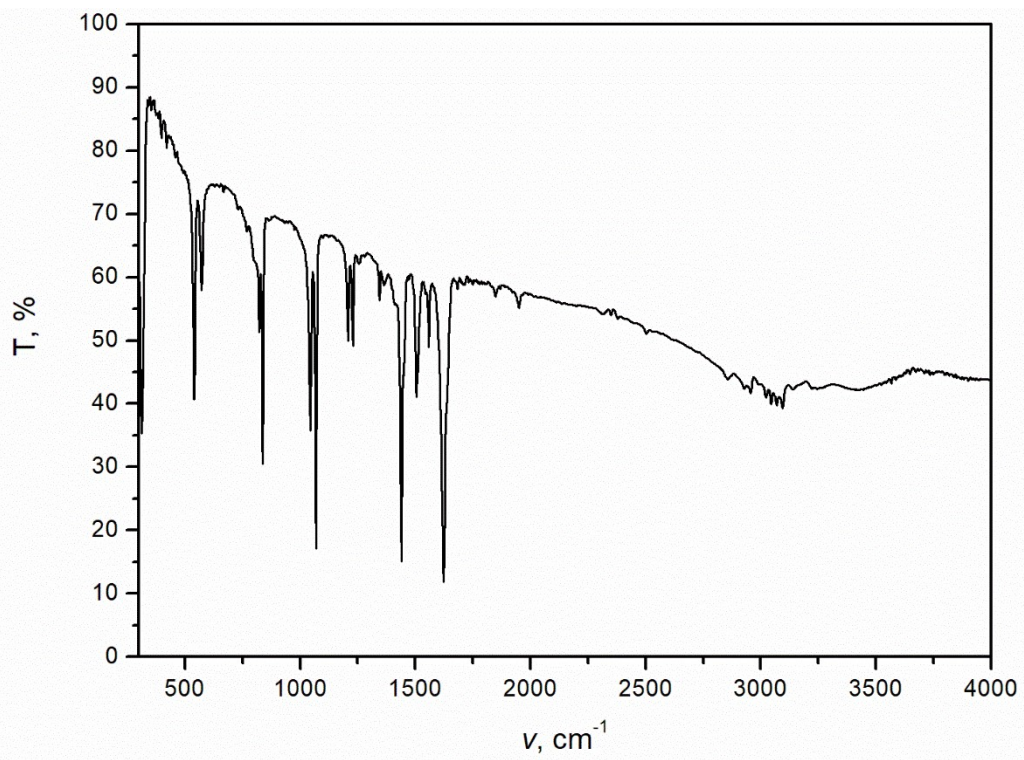

**Fig. S18** IR spectrum of **8**.

**Table S1.** Mass spectrometry study of the complexes **1-3** at 350, 400 and 450 °C (70eV).

| Ion (X <sup>+</sup> )                                                                     | I/I <sub>0</sub> , % |            |            |            |            |            |            |            |            |      |
|-------------------------------------------------------------------------------------------|----------------------|------------|------------|------------|------------|------------|------------|------------|------------|------|
|                                                                                           | 1                    |            |            | 2          |            |            | 3          |            |            |      |
| T, °C                                                                                     | <b>350</b>           | <b>400</b> | <b>450</b> | <b>350</b> | <b>400</b> | <b>450</b> | <b>350</b> | <b>400</b> | <b>450</b> |      |
| X <sup>+</sup>                                                                            | 1.9                  | 1.6        | 2.1        | 0.1        | 3.3        | 2.8        | 2.1        | 4.3        | 9.9        |      |
| HX <sup>+</sup>                                                                           | 10.3                 | 6.5        | 8.5        | 0.4        | 8.7        | 5.3        | 5.1        | 9.1        | 18.9       |      |
| C <sub>12</sub> H <sub>12</sub> N <sub>2</sub> <sup>+</sup>                               | 69.2                 | 73.9       | 71.5       | 34.0       | 93.2       | 75.7       | 24.9       | 23.8       | 31.2       |      |
| M <sup>+</sup>                                                                            | 0.3                  | 0.6        | 0.9        | 0.4        | 16.9       | 20.5       | 0.1        | 0.7        | 1.2        |      |
| MX <sub>2</sub> <sup>+</sup>                                                              | 3.5                  | 12.2       | 14.1       | 1.7        | 34.7       | 47.8       | 0.1        | 1.2        | 3.8        |      |
| MX <sub>3</sub> <sup>+</sup>                                                              | 0.2                  | 0.5        | 0.6        | -          | 3.4        | 4.6        | 0.01       | 0.1        | 0.2        |      |
| MX <sub>2</sub> C <sub>6</sub> H <sub>6</sub> N <sup>+</sup>                              | 2.7                  | 10.2       | 11.2       | 0.2        | 11.0       | 14.0       | 0.6        | 3.3        | 5.4        |      |
| MX <sub>2</sub> C <sub>12</sub> H <sub>12</sub> N <sub>2</sub> <sup>+</sup>               | 2.8                  | 7.9        | 7.7        | 3.1        | 17.8       | 25.1       | 4.2        | 4.8        | 6.9        |      |
| MX <sub>3</sub> C <sub>12</sub> H <sub>12</sub> N <sub>2</sub> <sup>+</sup>               | 1.3                  | 3.9        | 3.7        | 1.1        | 2.0        | 2.4        | -          | -          | -          |      |
| M <sub>2</sub> X <sub>5</sub> C <sub>12</sub> H <sub>12</sub> N <sub>2</sub> <sup>+</sup> | 0.1                  | 0.6        | 0.7        | 0.02       | 2.9        | 5.6        | 0.02       | 0.01       | 0.03       |      |
| bpa<br>fragments<br>, m/z                                                                 | 38-41                | 9.8        | 15.8       | 20.0       | 5.2        | 15.7       | 15.2       | 6.3        | 19.7       | 23.5 |
|                                                                                           | 50-52                | 14.1       | 23.0       | 26.4       | 10.2       | 19.2       | 20.6       | 13.6       | 24.0       | 32.4 |
|                                                                                           | 63-66                | 40.5       | 54.7       | 60.1       | 49.1       | 56.5       | 61.0       | 72.2       | 51.6       | 68.8 |
|                                                                                           | 91-93                | 100        | 100        | 100        | 100        | 100        | 100        | 100        | 100        | 100  |

**Table S2.** Mass spectrometry study of the complexes **5-8** at 350, 400 and 450 °C (70eV).

| Ion (X <sup>+</sup> )                                                                     | I/I <sub>0</sub> , % |            |            |            |            |            |            |            |            |            |            |            |      |
|-------------------------------------------------------------------------------------------|----------------------|------------|------------|------------|------------|------------|------------|------------|------------|------------|------------|------------|------|
|                                                                                           | 5                    |            |            | 6          |            |            | 7          |            |            | 8          |            |            |      |
| T, °C                                                                                     | <b>350</b>           | <b>400</b> | <b>450</b> | <b>350</b> | <b>400</b> | <b>450</b> | <b>350</b> | <b>400</b> | <b>450</b> | <b>350</b> | <b>400</b> | <b>450</b> |      |
| X <sup>+</sup>                                                                            | 3.8                  | 2.3        | 1.2        | 32.4       | 12.9       | 15.4       | 2.9        | 1.5        | 0.8        | 7.7        | 12.3       | 10.8       |      |
| HX <sup>+</sup>                                                                           | 20.6                 | 13.4       | 7.0        | 80.1       | 31.6       | 34.5       | 16.6       | 7.4        | 2.9        | 7.7        | 9.9        | 7.4        |      |
| C <sub>12</sub> H <sub>12</sub> N <sub>2</sub> <sup>+</sup>                               | 100                  | 100        | 100        | 100        | 100        | 100        | 100        | 100        | 100        | 100        | 75.5       | 45.2       |      |
| M <sup>+</sup>                                                                            | 1.2                  | 0.8        | 0.5        | 0.8        | 1.0        | 1.9        | 1.2        | 2.6        | 3.2        | 8.2        | 14.7       | 12.8       |      |
| MX <sub>2</sub> <sup>+</sup>                                                              | 3.8                  | 7.3        | 15.7       | 0.7        | 9.5        | 47.6       | 4.7        | 18.5       | 23.0       | 33.1       | 100        | 100        |      |
| MX <sub>3</sub> <sup>+</sup>                                                              | 0.4                  | 1.1        | 2.2        | 0.1        | 0.7        | 7.3        | 0.6        | 3.2        | 3.7        | 7.4        | 21.9       | 23.9       |      |
| MX <sub>2</sub> C <sub>6</sub> H <sub>6</sub> N <sup>+</sup>                              | 7.7                  | 28.2       | 66.7       | 2.2        | 19.6       | 94.8       | 1.9        | 9.9        | 14.2       | 22.7       | 32.8       | 27.5       |      |
| MX <sub>2</sub> C <sub>12</sub> H <sub>12</sub> N <sub>2</sub> <sup>+</sup>               | 7.3                  | 23.6       | 49.3       | 4.8        | 27.4       | 94.0       | 3.9        | 19.2       | 24.0       | 23.1       | 62.9       | 71.3       |      |
| MX <sub>3</sub> C <sub>12</sub> H <sub>12</sub> N <sub>2</sub> <sup>+</sup>               | 3.5                  | 6.0        | 6.3        | -          | -          | 0.04       | 0.5        | 2.1        | 2.4        | 0.1        | 0.02       | 0.01       |      |
| M <sub>2</sub> X <sub>5</sub> C <sub>12</sub> H <sub>12</sub> N <sub>2</sub> <sup>+</sup> | 1.5                  | 11.4       | 24.2       | 0.02       | 1.5        | 12.6       | 0.3        | 1.5        | 2.8        | 0.1        | 0.5        | 0.8        |      |
| bpa<br>fragments,<br>m/z                                                                  | 38-41                | 15.4       | 9.9        | 7.9        | 14.2       | 13.6       | 17.4       | 10.8       | 5.5        | 4.4        | 20.6       | 12.9       | 7.3  |
|                                                                                           | 50-52                | 14.3       | 9.5        | 9.1        | 11.0       | 11.2       | 14.6       | 7.0        | 4.7        | 4.5        | 12.8       | 11.2       | 7.3  |
|                                                                                           | 63-66                | 33.9       | 26.3       | 29.6       | 28.4       | 29.1       | 39.0       | 20.3       | 16.4       | 16.9       | 31.7       | 30.7       | 21.4 |
|                                                                                           | 91-93                | 68.1       | 53.8       | 56.3       | 70.0       | 69.8       | 81.0       | 54.4       | 42.3       | 41.6       | 73.1       | 64.8       | 45.0 |

## Intermolecular interactions in 1-8

The packing of molecules and ions in the crystals of **1-8** might be additionally influenced by weak hydrogen bonds and/or  $\pi\cdots\text{Hal}$  (hal = Cl, Br) interactions. However, in the compounds **1-4** these intermolecular interactions cannot be studied quantitatively because of the crystallographic disorder. Analysis of the site occupancy factors and intermolecular distances between different components of the disorder proves that there is no correlation between them. In another words, each of the disorder components ‘has enough space’ in the crystal that points to the absence of strong non-bonding interactions.

The analysis of the intermolecular contacts in **5-8** reveals some potential hydrogen bonds (Tables S3-S6) and/or  $\pi\cdots\text{Hal}$  (Hal = Cl, Br) interactions.

In the compound **5**, there are two types of  $\text{C}(\pi)\cdots\text{Cl}$  contacts of 3.555(2) and 3.562(2) Å. The angles at Cl atoms are of 92.82(4) and 155.27(4)°, respectively (Fig. S19a). As a result, the molecules are joined to each other into the infinite layers (1 0 2) (Fig. S19b).

**Table S3.** Selected hydrogen-bond parameters in compound **5**

| $D\text{—H}\cdots A$             | $D\text{—H}$ (Å) | $\text{H}\cdots A$ (Å) | $D\cdots A$ (Å) | $D\text{—H}\cdots A$ (°) |
|----------------------------------|------------------|------------------------|-----------------|--------------------------|
| C1—H1 $\cdots$ Cl3               | 0.95             | 2.98                   | 3.4587 (18)     | 112.3                    |
| C2—H2 $\cdots$ Cl1 <sup>i</sup>  | 0.95             | 2.90                   | 3.6687 (18)     | 138.3                    |
| C4—H4 $\cdots$ Cl1 <sup>ii</sup> | 0.95             | 2.89                   | 3.7815 (17)     | 156.1                    |
| C5—H5 $\cdots$ Cl1               | 0.95             | 2.91                   | 3.4502 (16)     | 117.3                    |

Symmetry code(s): (i)  $x, -y+3/2, z-1/2$ ; (ii)  $-x, y+1/2, -z+1/2$ .

**Table S4.** Selected hydrogen-bond parameters in compound **6**

| $D\text{—H}\cdots A$            | $D\text{—H}$ (Å) | $\text{H}\cdots A$ (Å) | $D\cdots A$ (Å) | $D\text{—H}\cdots A$ (°) |
|---------------------------------|------------------|------------------------|-----------------|--------------------------|
| C1—H1 $\cdots$ Br1              | 0.95             | 3.00                   | 3.528 (3)       | 116.6                    |
| C1—H1 $\cdots$ Br1 <sup>i</sup> | 0.95             | 2.97                   | 3.643 (3)       | 129.5                    |
| C5—H5 $\cdots$ Br3              | 0.95             | 2.94                   | 3.500 (3)       | 118.7                    |

**Table S5.** Selected hydrogen-bond parameters in compound **7**

| $D-H\cdots A$                    | $D-H$ (Å) | $H\cdots A$ (Å) | $D\cdots A$ (Å) | $D-H\cdots A$ (°) |
|----------------------------------|-----------|-----------------|-----------------|-------------------|
| C1—H1 $\cdots$ C11               | 0.95      | 2.93            | 3.4470 (14)     | 115.3             |
| C1—H1 $\cdots$ C11 <sup>i</sup>  | 0.95      | 2.82            | 3.5107 (14)     | 130.2             |
| C5—H5 $\cdots$ C12 <sup>ii</sup> | 0.95      | 2.83            | 3.6445 (15)     | 144.9             |
| C5—H5 $\cdots$ C13               | 0.95      | 2.91            | 3.4518 (15)     | 117.2             |

Symmetry code(s): (i)  $-x+2, y-1/2, -z+1/2$ ; (ii)  $x-1, y, z$ .

**Table S6.** Selected hydrogen-bond parameters in compound **8**

| $D-H\cdots A$                    | $D-H$ (Å) | $H\cdots A$ (Å) | $D\cdots A$ (Å) | $D-H\cdots A$ (°) |
|----------------------------------|-----------|-----------------|-----------------|-------------------|
| C1—H1 $\cdots$ Br1               | 0.95      | 3.00            | 3.543 (4)       | 117.4             |
| C1—H1 $\cdots$ Br1 <sup>i</sup>  | 0.95      | 2.96            | 3.640 (4)       | 129.2             |
| C5—H5 $\cdots$ Br2 <sup>ii</sup> | 0.95      | 3.00            | 3.821 (4)       | 145.1             |
| C5—H5 $\cdots$ Br3               | 0.95      | 2.97            | 3.533 (4)       | 119.4             |

Symmetry code(s): (i)  $-x+2, y-1/2, -z+1/2$ ; (ii)  $x-1, y, z$ .

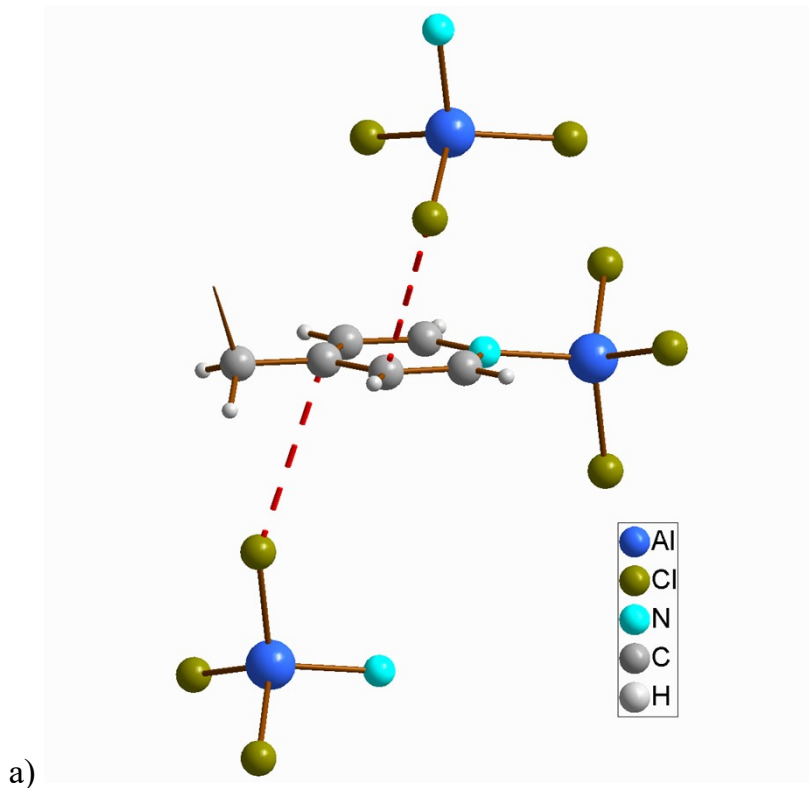

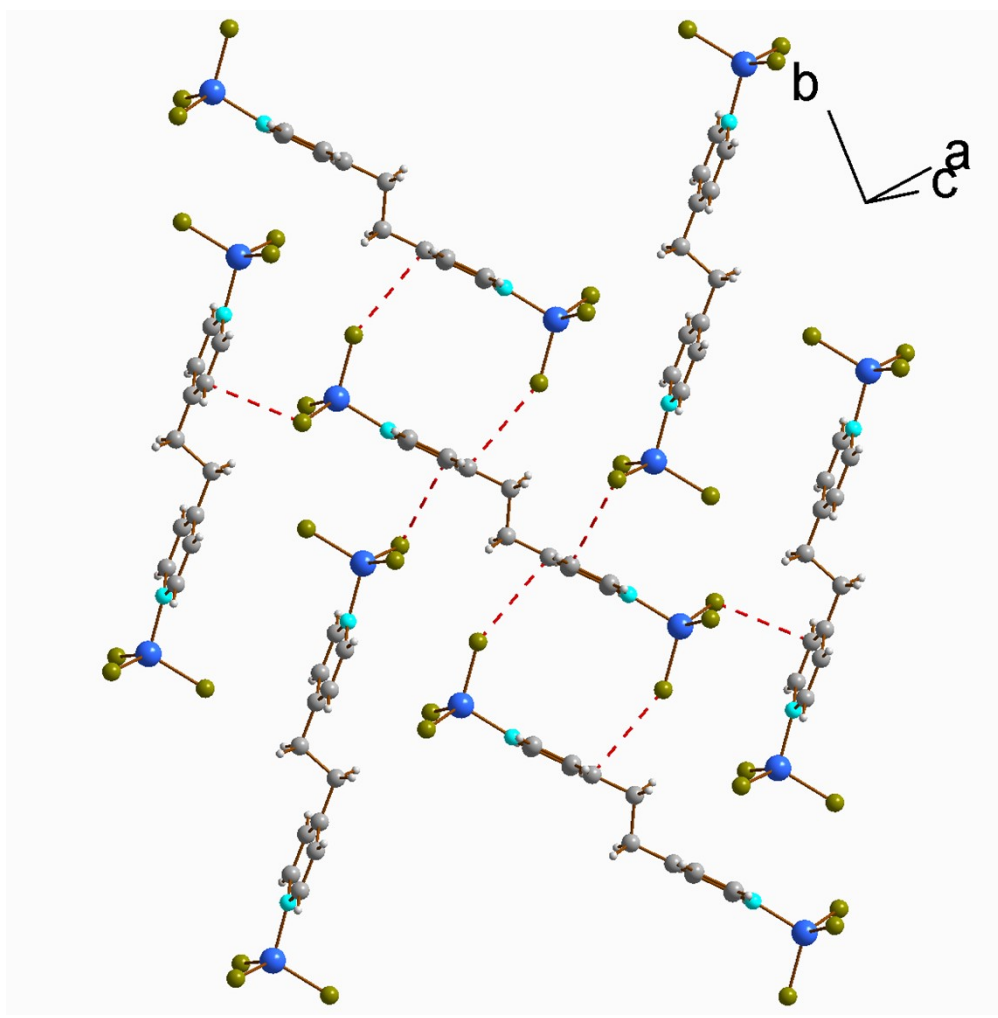

b)

**Fig. S19** a) Close-up to the short C...Cl contacts of 3.555(2) and 3.562(2) Å; b) the (1 0 2) layer in the crystal of **5**. Contacts are shown as red dashed lines.

In the isostructural compounds **6**, **7** and **8**, analysis of the intermolecular contacts reveals two types of Hal...C( $\pi$ ) contacts (Fig.S20a, Table S7). These contacts join the molecules into the 3D network (Fig. S20b).

**Table S7.** Intermolecular Hal...C( $\pi$ ) contacts in compounds **6-8**

| <i>Compound</i>       | <b>6</b>  | <b>7</b>   | <b>8</b>  |
|-----------------------|-----------|------------|-----------|
| Hal(3)...C(5), Å      | 3.462(2)  | 3.3136(13) | 3.439(4)  |
| $\angle$ M-Hal...C, ° | 132.18(5) | 121.57(3)  | 122.33(7) |
| Hal(1)...C(4), Å      | 3.561(3)  | 3.4935(14) | 3.517(4)  |
| $\angle$ M-Hal...C, ° | 161.19(5) | 167.14(3)  | 169.47(6) |

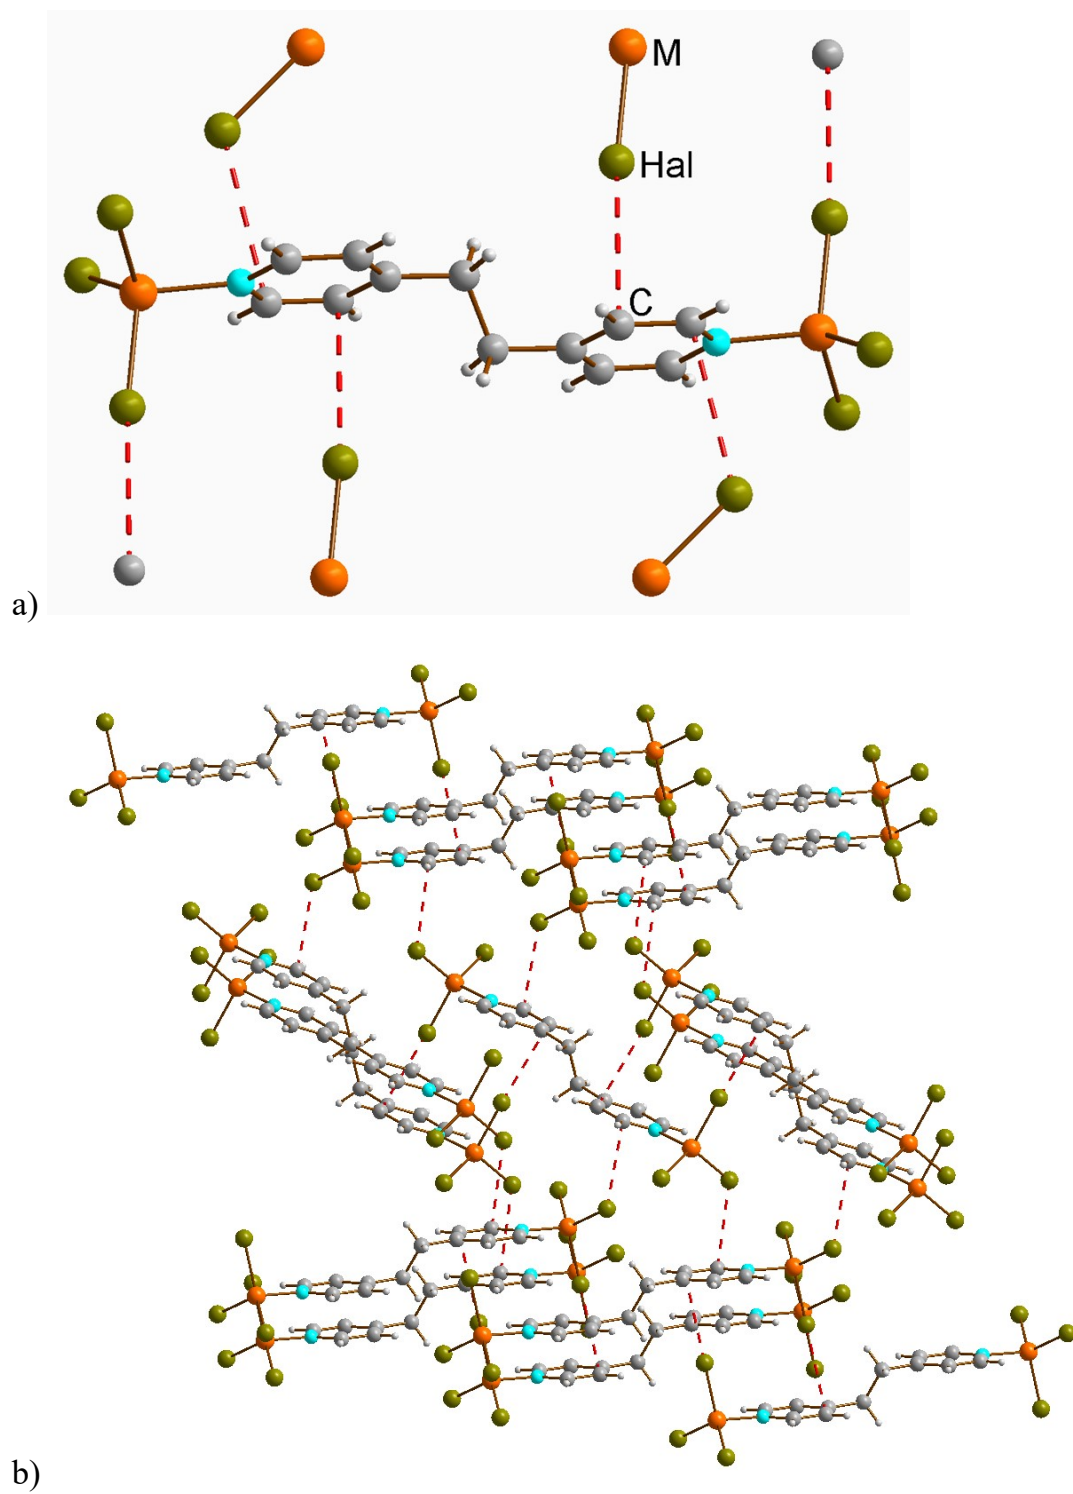

**Fig. S20.** a) Nearest environment of the molecules **6-8** in the crystal; b) 3D-network based on the C...Hal contacts that are shown as red dashed lines.



### Modulation in the crystal structure of compound 3.

The structure of  $[\text{AlBr}_2(\text{bpa})_2]^+\text{Br}$  is modulated, in which the entire polymer chain and/or the positions of the Br- ligands are displaced according to the harmonic law. The diffraction data were obtained on P11 beamline at PETRA III synchrotron, DESY, Hamburg. Diffraction measurements were done at  $T = 80 \text{ K}$  using the radiation with the energy of  $18 \text{ keV}$  ( $\lambda = 0.6888 \text{ \AA}$ ) and Dectris Pilatus 6M photon counting detector. Narrow ( $0.1^\circ$ ) scans were used to collect 3600 frames by full rotation around the horizontal axis. First 2000 frames were processed using *CrysAlisPro* software package (Rigaku OD), the rest frames were discarded because they were affected by the radiation damage.

The reciprocal lattice reconstruction shows the presence of weak reflections that cannot be indexed in the primitive monoclinic unit cell  $a=11.77$ ,  $b=9.74$ ,  $c=11.57 \text{ \AA}$ ,  $\beta = 107.93^\circ$ ,  $V=1262 \text{ \AA}^3$ . Their  $hkl$  indices correspond to the  $\pm n/3$  series, pointing the harmonic modulation with the vectors of  $(2/3; 2/3; 1/3)$  and  $(1/3; 2/3; 1/3)$  (Fig. S21).

The sections of the reciprocal space prove this assumption (Fig. S22).

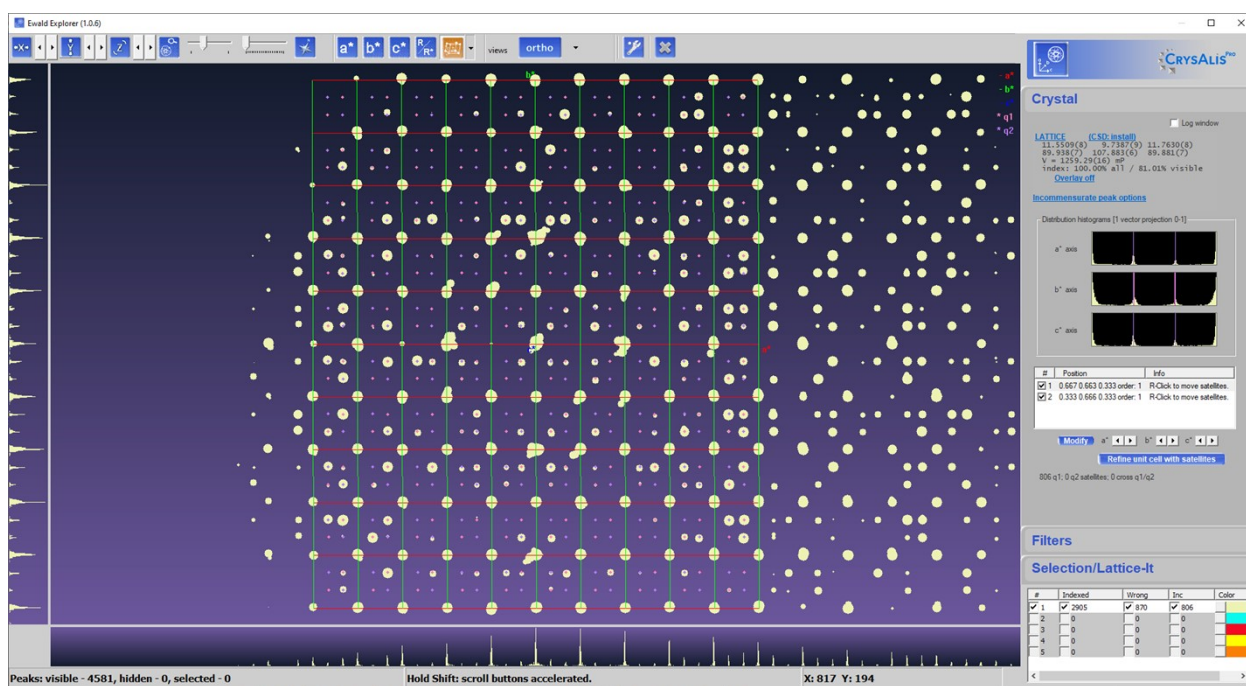

**Fig. S21.** The reciprocal lattice reconstruction done with *Ewald Explorer* (*CrysAlisPro* software package).

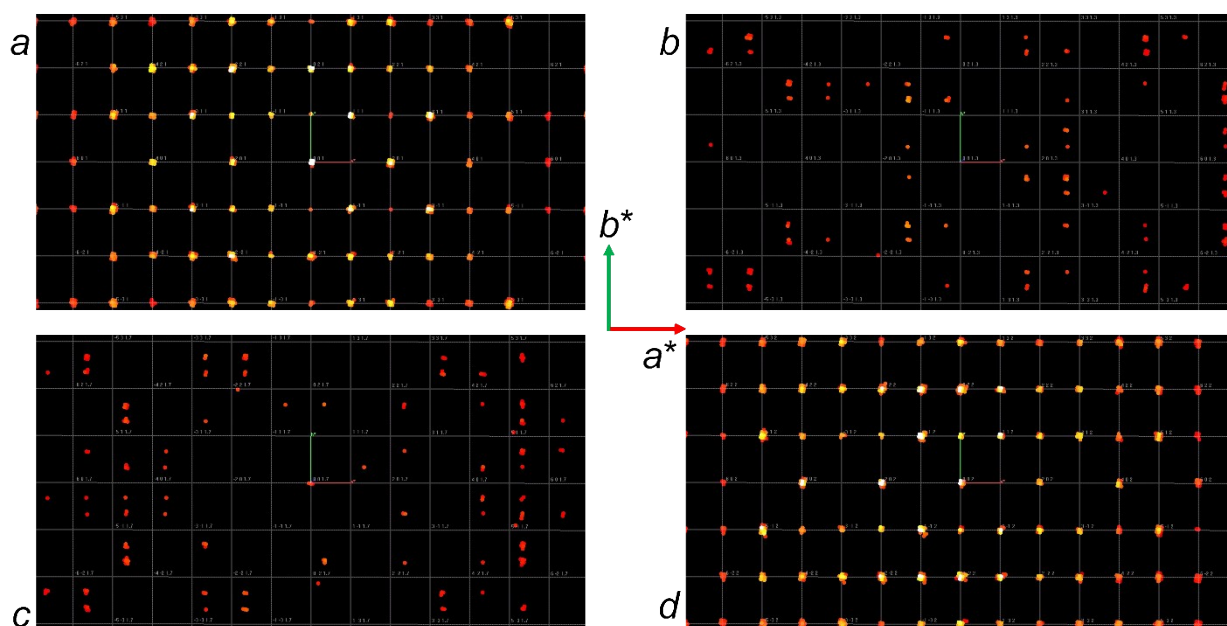

**Fig. S22.** Layers  $hkl$  in the reciprocal space for  $l = 1$  (a),  $1.333$  (b),  $1.667$  (c) and  $2$  (d), generated with the *Ewald3D* (*CrysAlisPro* software package).

However, the intensities of the satellite reflections are so low and cannot be measured at the satisfactory level of  $I/\sigma$  even with the usage of high-flux synchrotron radiation. Therefore, we decided to limit ourselves with the refinement of the average structure. The modulation effect manifests itself in the disorder of terminal Br atoms and relatively large atomic displacement parameters of all non-hydrogen atoms (Fig. 2a in the main text of the article).

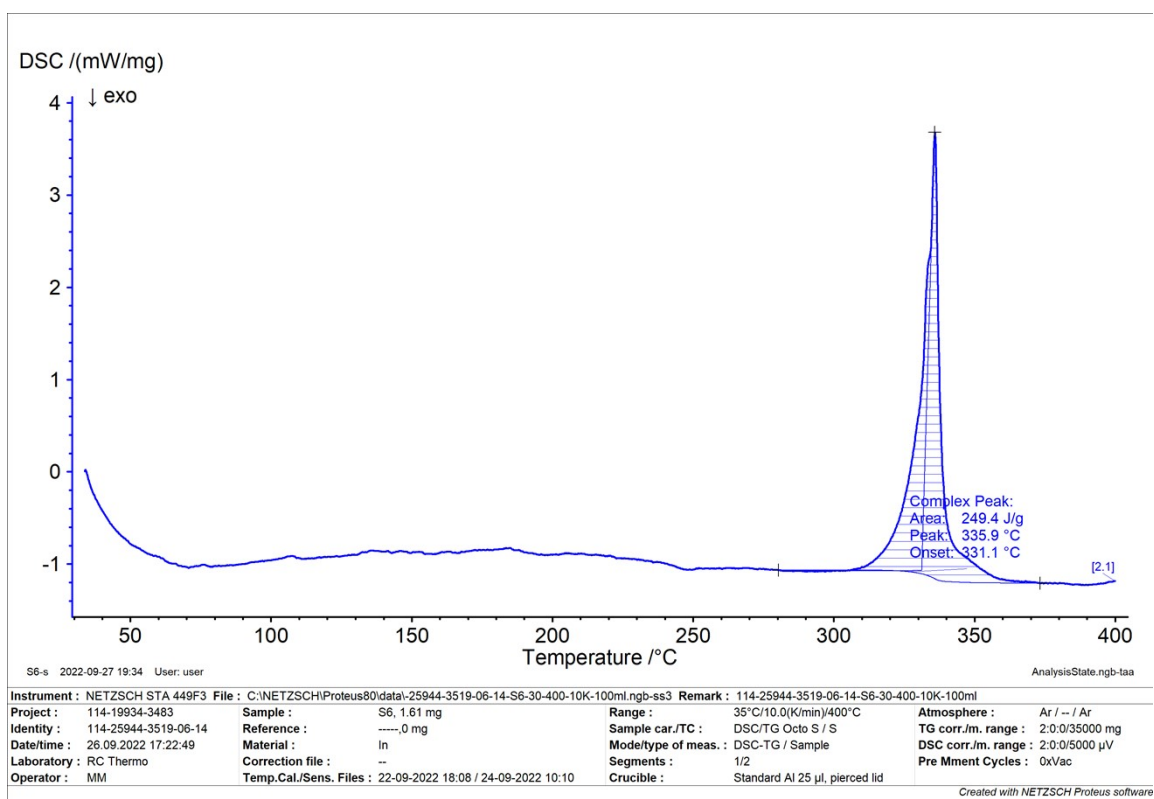

a)

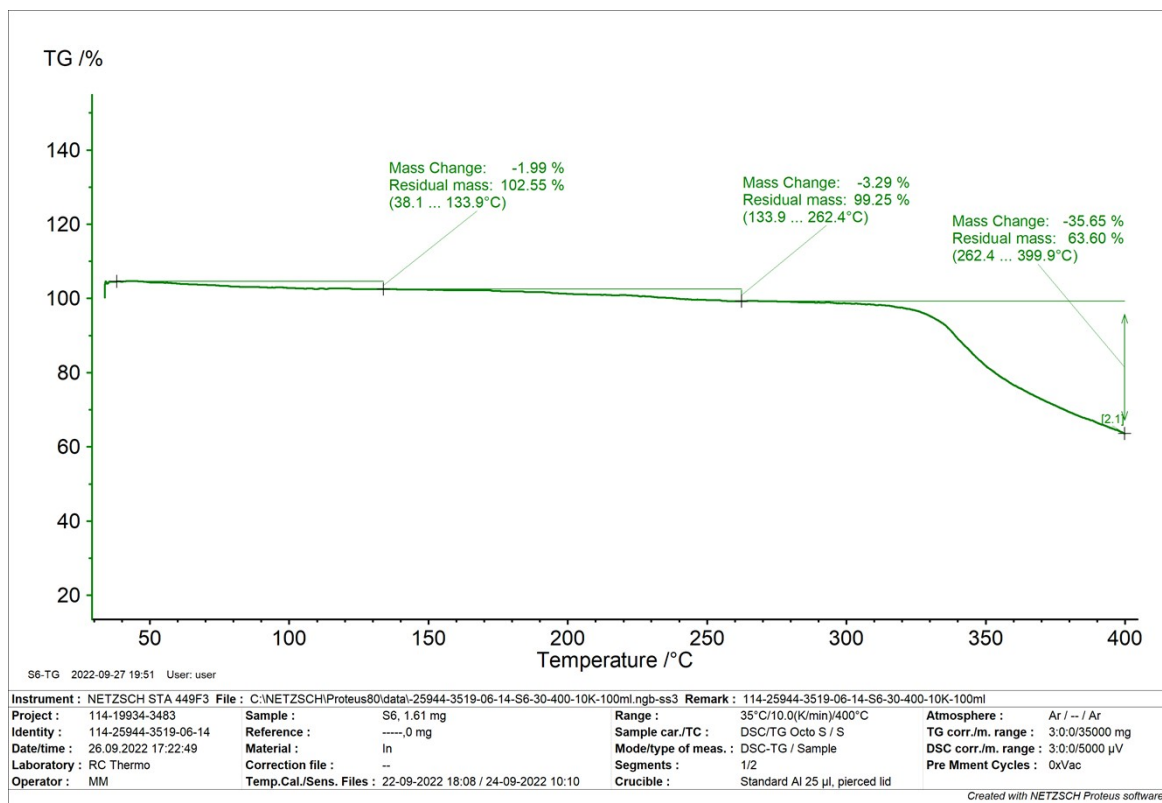

b)

**Fig. S23.** Simultaneous DSC (a) and TG (b) analysis of **1** in a constant argon flow with a heating rate of 10 K/min from 35 to 400 °C.

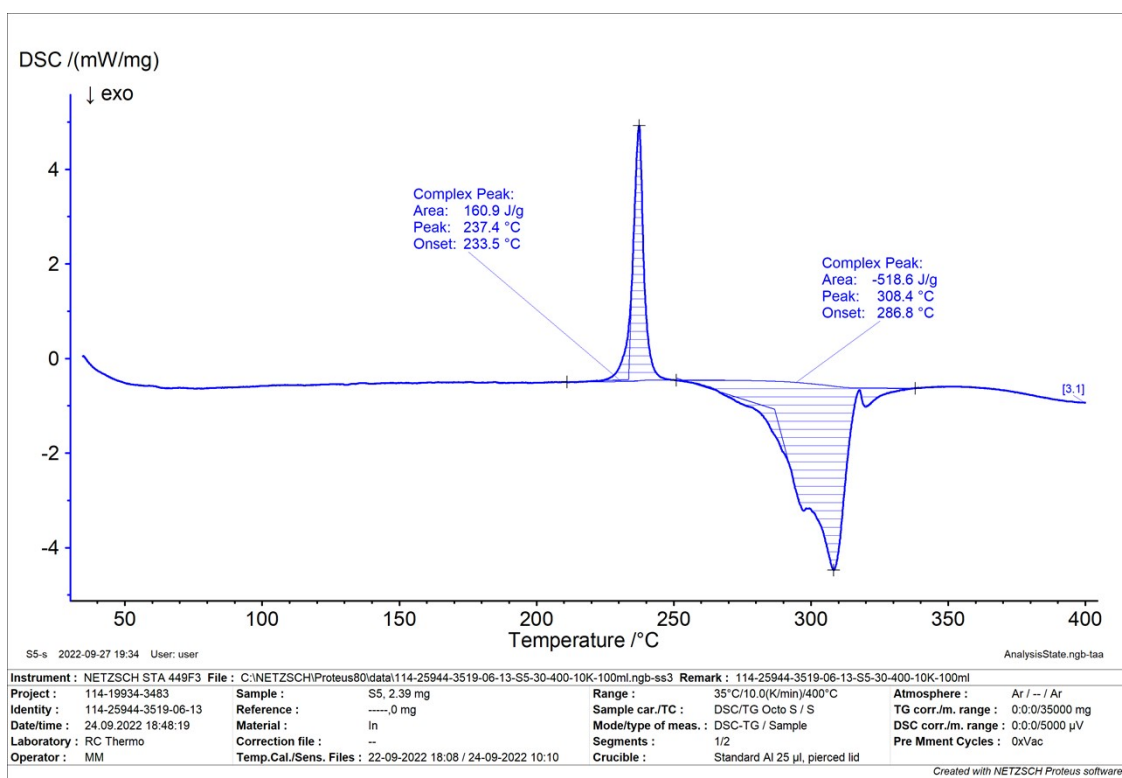

a)

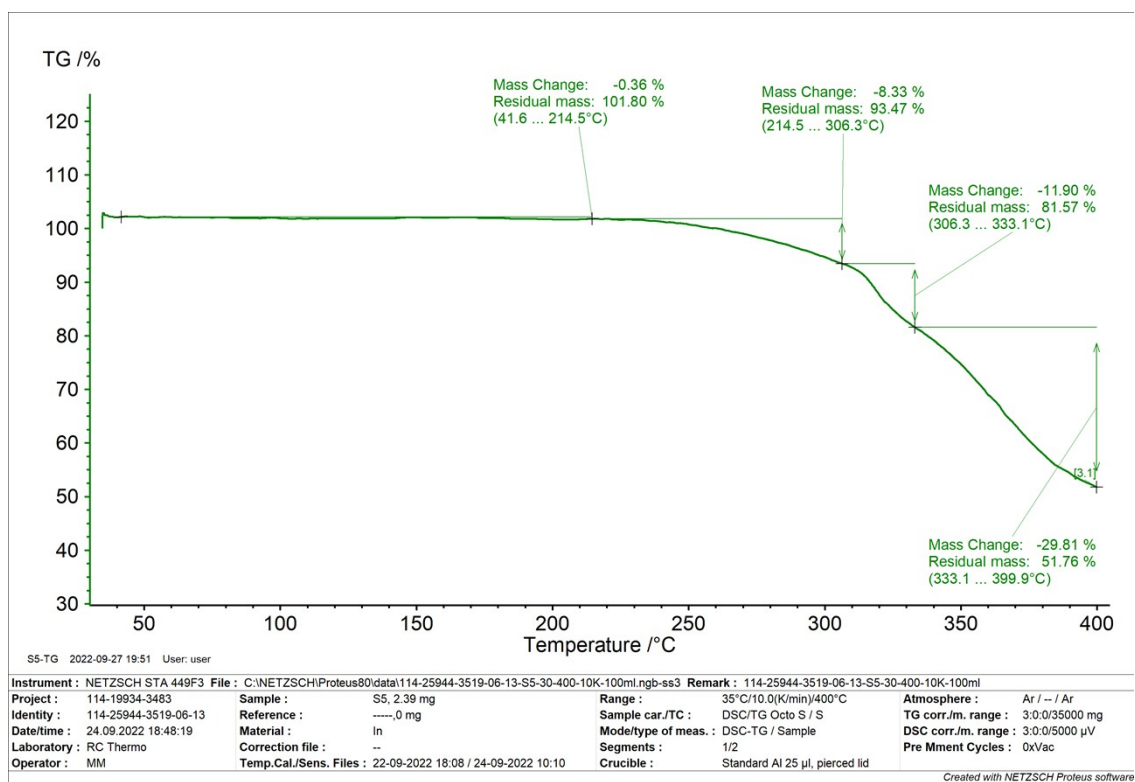

b)

**Fig. S24.** Simultaneous DSC (a) and TG (b) analysis of **2** in a constant argon flow with a heating rate of 10 K/min from 35 to 400 °C.

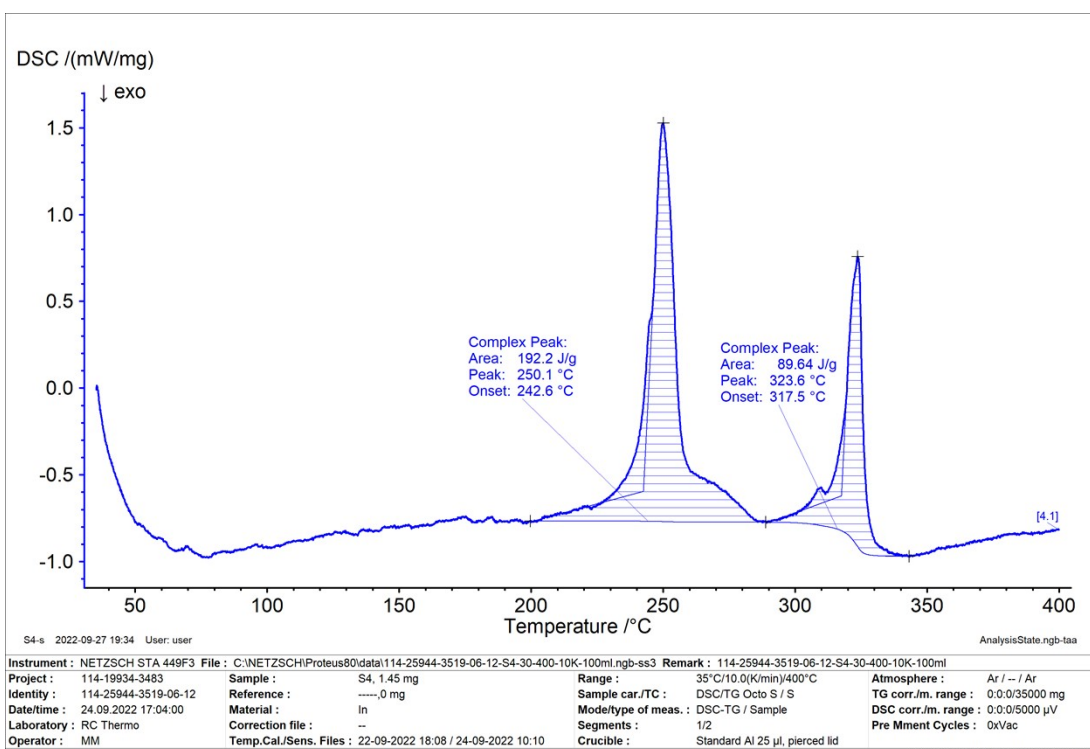

a)

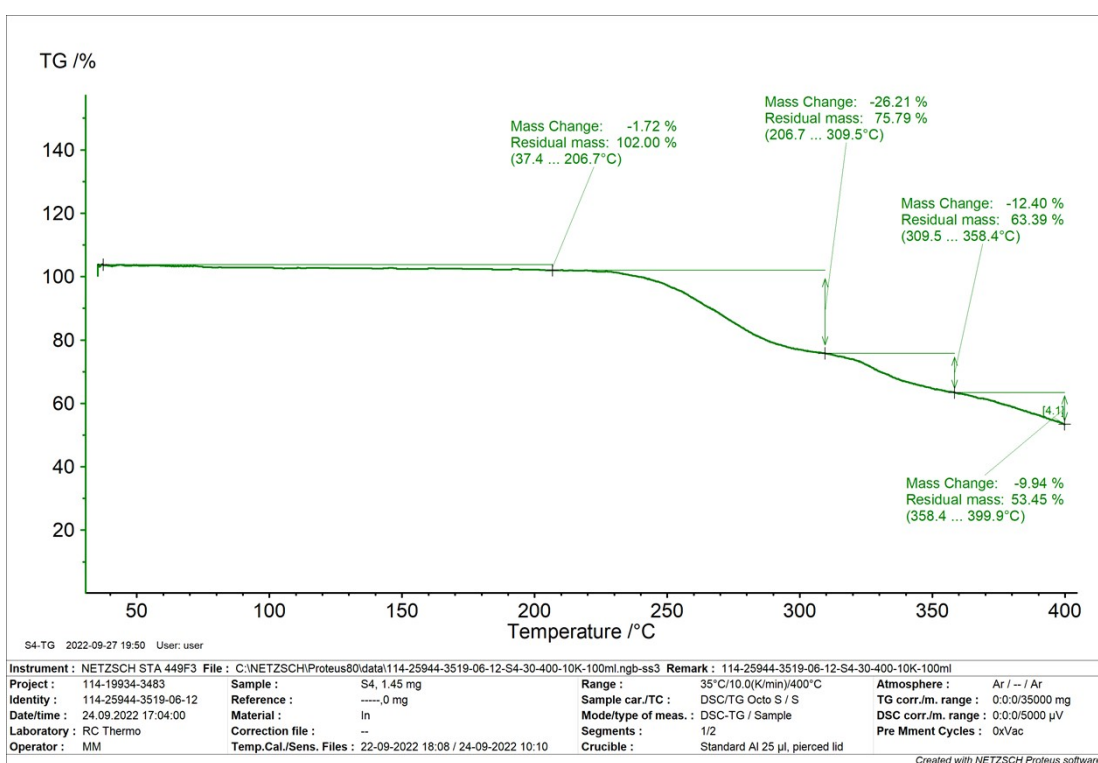

b)

**Fig. S25.** Simultaneous DSC (a) and TG (b) analysis of **3** in a constant argon flow with a heating rate of 10 K/min from 35 to 400 °C.

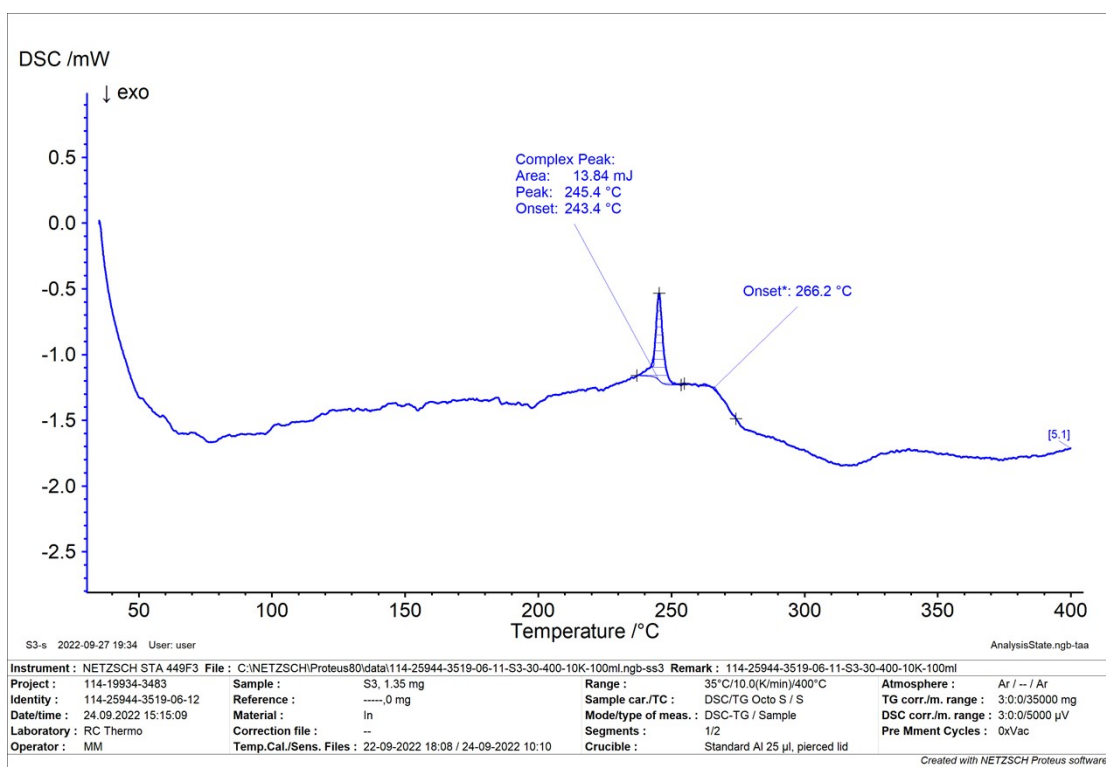

a)

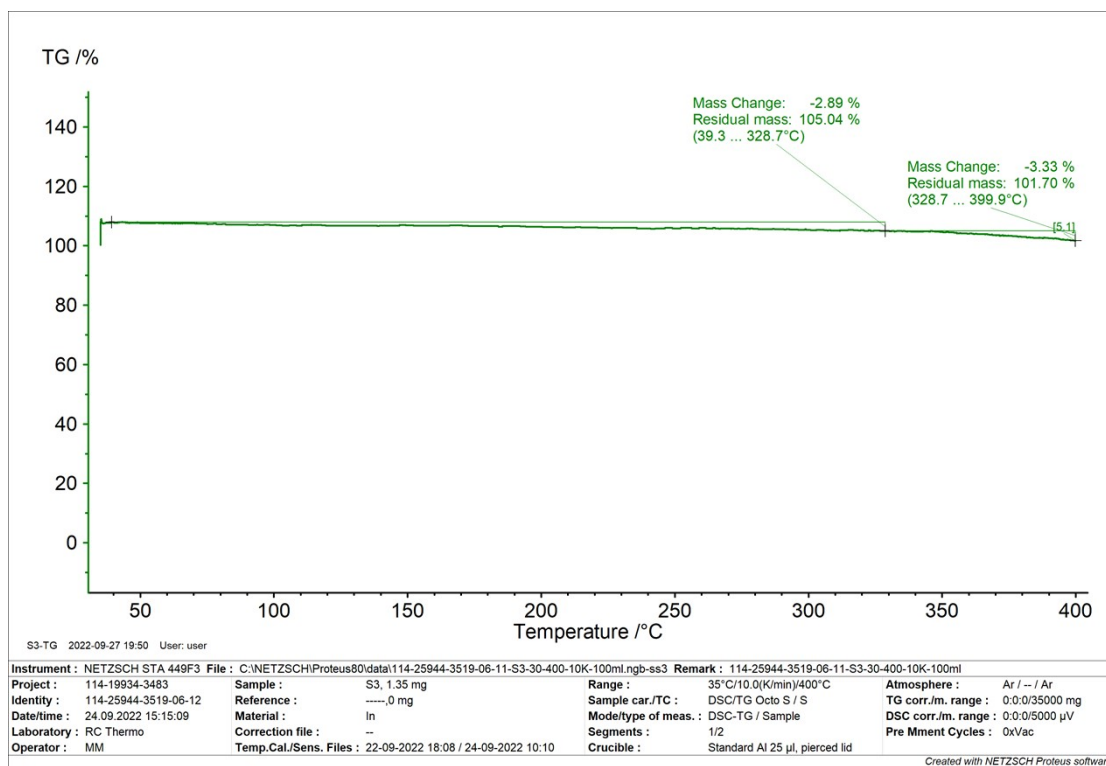

b)

**Fig. S26.** Simultaneous DSC (a) and TG (b) analysis of **5** in a constant argon flow with a heating rate of 10 K/min from 35 to 400 °C.

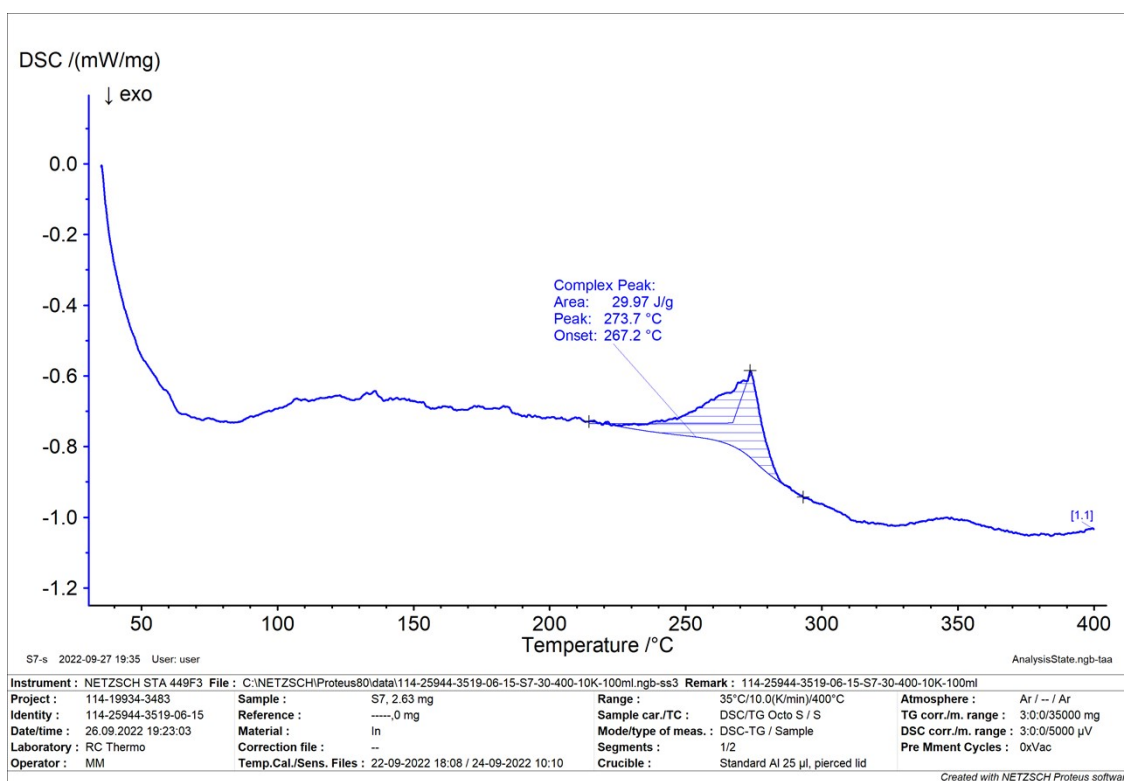

a)

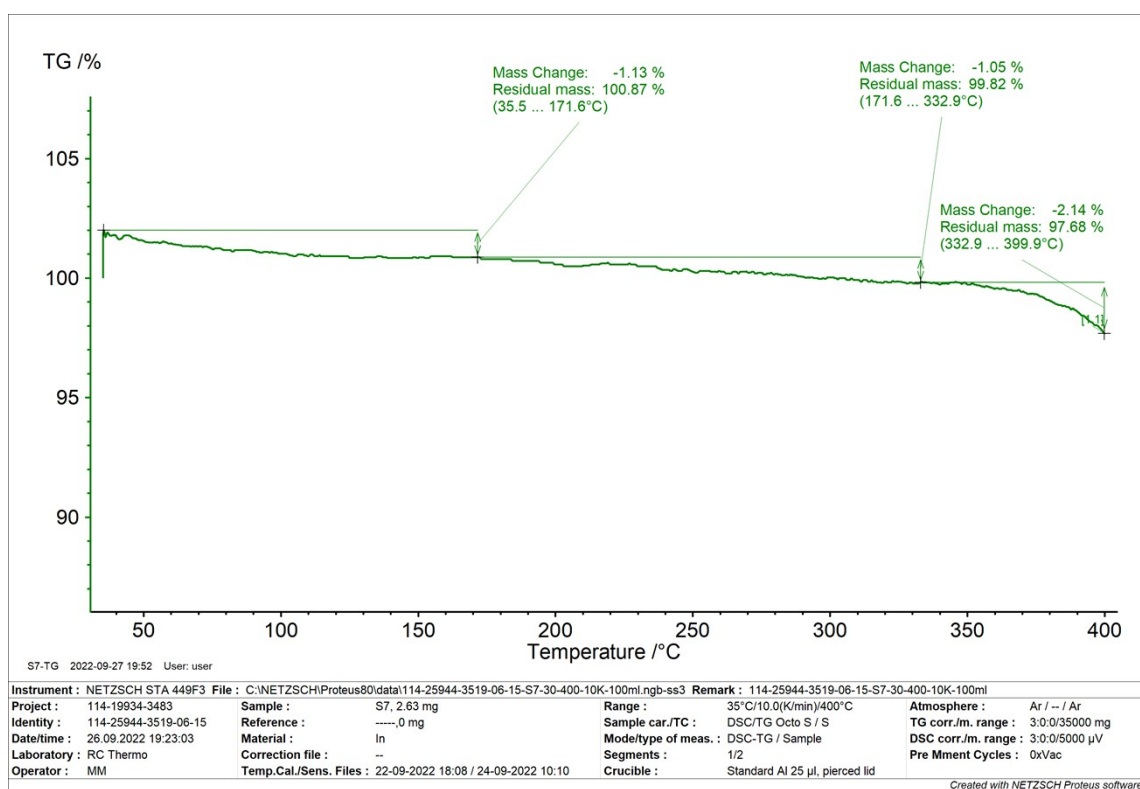

b)

**Fig. S27.** Simultaneous DSC (a) and TG (b) analysis of **6** in a constant argon flow with a heating rate of 10 K/min from 35 to 400 °C.

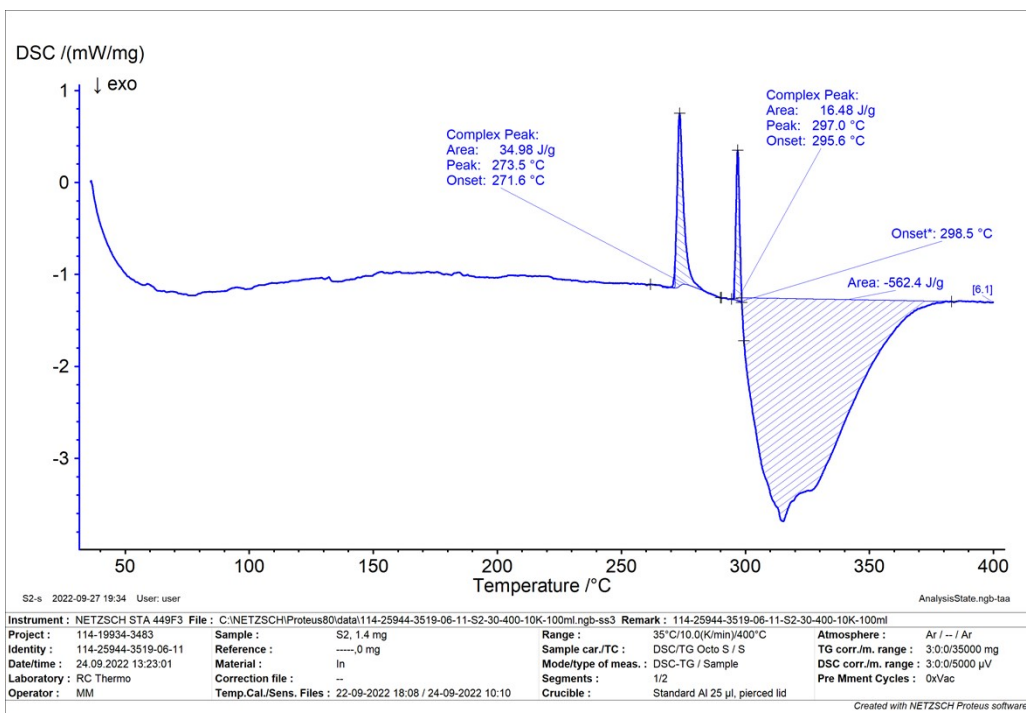

a)

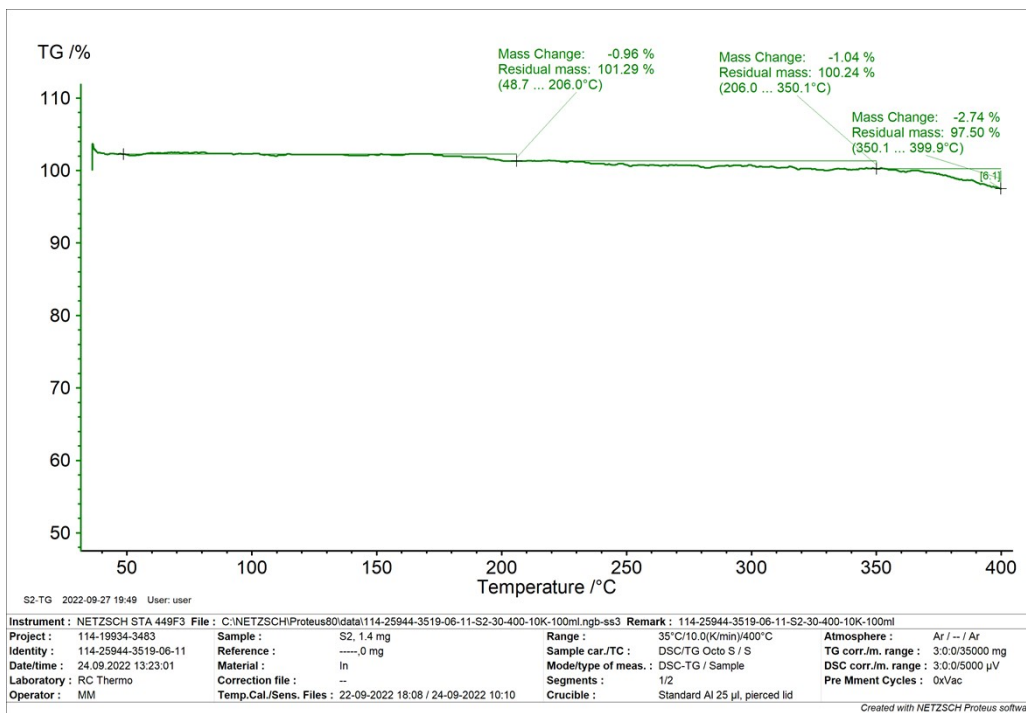

b)

**Fig. S28.** Simultaneous DSC (a) and TG (b) analysis of **7** in a constant argon flow with a heating rate of 10 K/min from 35 to 400 °C.



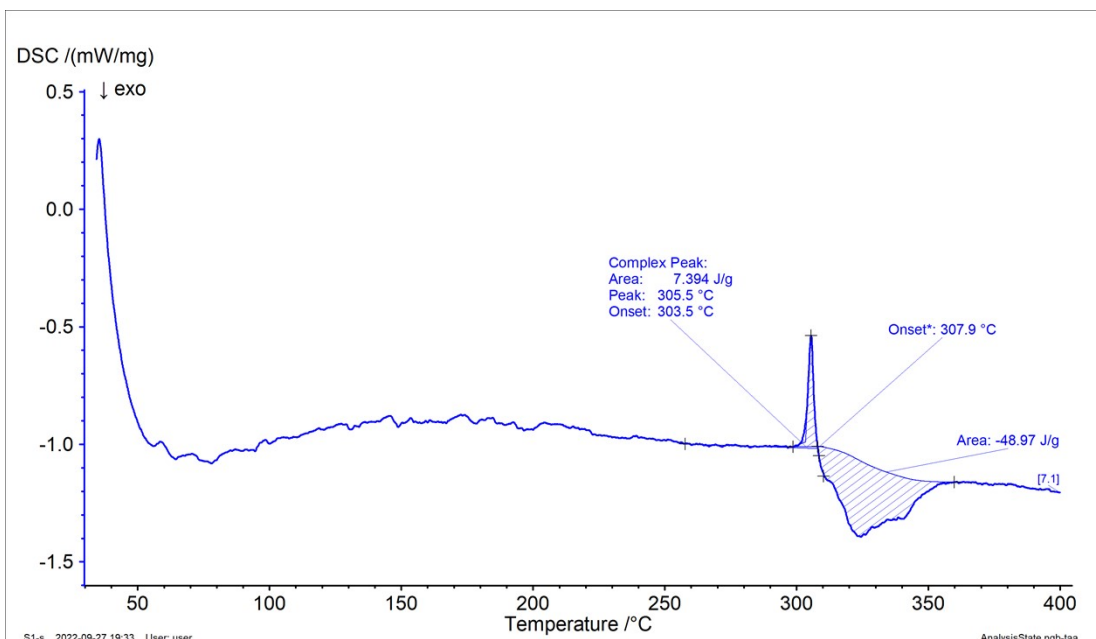

S1-s 2022-09-27 19:33 User: user AnalysisState.ngb-taa

|                                 |                                                                                   |                                                   |
|---------------------------------|-----------------------------------------------------------------------------------|---------------------------------------------------|
| Instrument : NETZSCH STA 449F3  | File : C:\NETZSCH\Proteus80\data\114-25944-3519-06-10-S1-30-400-10K-100ml.ngb-ss3 | Remark : 114-25944-3519-06-10-S1-30-400-10K-100ml |
| Project : 114-19934-3483        | Sample : S1, 1.8 mg                                                               | Range : 35°C/10.0(K/min)/400°C                    |
| Identity : 114-25944-3519-06-10 | Reference : ----,0 mg                                                             | Sample car./TC : DSC/TG Octo S / S                |
| Date/time : 24.09.2022 11:39:00 | Material : In                                                                     | Mode/type of meas. : DSC-TG / Sample              |
| Laboratory : RC Thermo          | Correction file : --                                                              | Segments : 1/2                                    |
| Operator : MM                   | Temp.Cal./Sens. Files : 22-09-2022 18:08 / 24-09-2022 10:10                       | Crucible : Standard Al 25 µl, pierced lid         |
|                                 |                                                                                   | Atmosphere : Ar / -- / Ar                         |
|                                 |                                                                                   | TG corr./m. range : 3.0:0/35000 mg                |
|                                 |                                                                                   | DSC corr./m. range : 3.0:0/5000 µV                |
|                                 |                                                                                   | Pre Mment Cycles : 0xVac                          |

a)

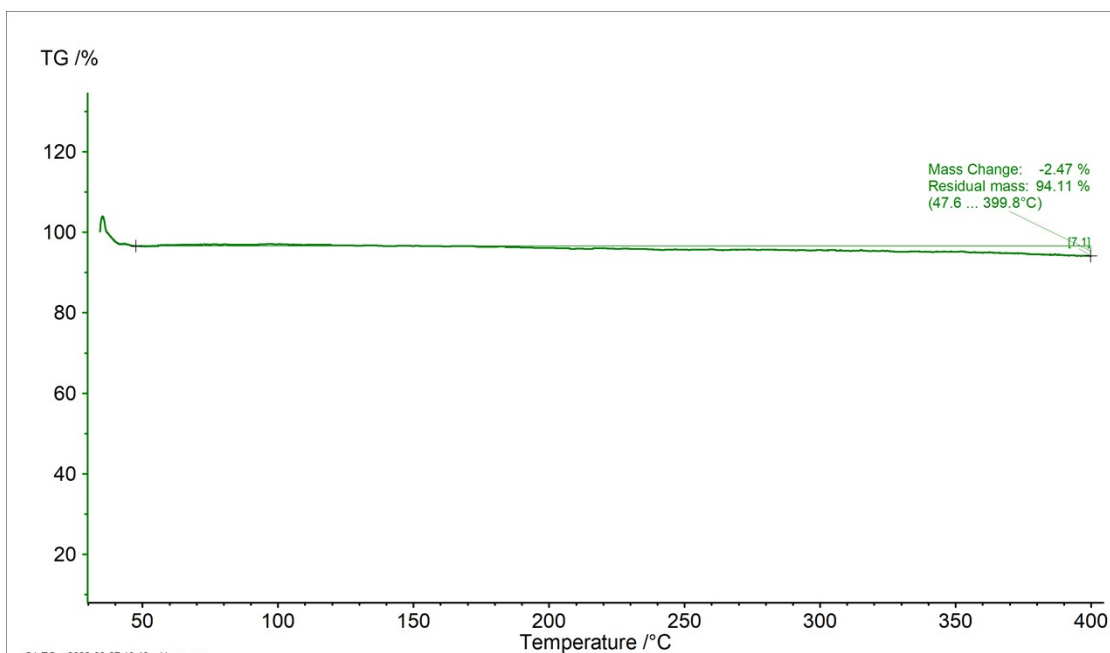

S1-TG 2022-09-27 19:48 User: user

|                                 |                                                                                   |                                                   |
|---------------------------------|-----------------------------------------------------------------------------------|---------------------------------------------------|
| Instrument : NETZSCH STA 449F3  | File : C:\NETZSCH\Proteus80\data\114-25944-3519-06-10-S1-30-400-10K-100ml.ngb-ss3 | Remark : 114-25944-3519-06-10-S1-30-400-10K-100ml |
| Project : 114-19934-3483        | Sample : S1, 1.8 mg                                                               | Range : 35°C/10.0(K/min)/400°C                    |
| Identity : 114-25944-3519-06-10 | Reference : ----,0 mg                                                             | Sample car./TC : DSC/TG Octo S / S                |
| Date/time : 24.09.2022 11:39:00 | Material : In                                                                     | Mode/type of meas. : DSC-TG / Sample              |
| Laboratory : RC Thermo          | Correction file : --                                                              | Segments : 1/2                                    |
| Operator : MM                   | Temp.Cal./Sens. Files : 22-09-2022 18:08 / 24-09-2022 10:10                       | Crucible : Standard Al 25 µl, pierced lid         |
|                                 |                                                                                   | Atmosphere : Ar / -- / Ar                         |
|                                 |                                                                                   | TG corr./m. range : 0.0:0/35000 mg                |
|                                 |                                                                                   | DSC corr./m. range : 0.0:0/5000 µV                |
|                                 |                                                                                   | Pre Mment Cycles : 0xVac                          |

b)

**Fig. S29.** Simultaneous DSC (a) and TG (b) analysis of **8** in a constant argon flow with a heating rate of 10 K/min from 35 to 400 °C.

## Computational data

**Table S8.** Total energies  $E_0$ , standard enthalpies  $H^\circ_{298}$  (in Hartree) and standard entropies  $S^\circ_{298}$  (in cal mol<sup>-1</sup> K<sup>-1</sup>) for studied compounds. M06-2X/def2-TZVPPD level of theory.

| Compound                         | $E_0$        | $H^\circ_{298}$ | $S^\circ_{298}$ |
|----------------------------------|--------------|-----------------|-----------------|
| H <sup>+</sup>                   | 0            | 0.002360        | 26.014          |
| pyz                              | -264.4198205 | -264.222899     | 65.443          |
| pyzH <sup>+</sup>                | -264.648695  | -264.552269     | 67.258          |
| pyzH <sub>2</sub> <sup>2+</sup>  | -264.8084612 | -264.699043     | 66.079          |
| bipy                             | -495.3547432 | -495.185749     | 89.736          |
| bipyH <sup>+</sup>               | -495.7205761 | -495.537634     | 91.583          |
| bipyH <sub>2</sub> <sup>2+</sup> | -495.9813436 | -495.784534     | 90.807          |
| bpe                              | -572.7502557 | -572.545324     | 106.254         |
| bpeH <sup>+</sup>                | -573.1228687 | -572.903904     | 109.884         |
| bpeH <sub>2</sub> <sup>2+</sup>  | -573.4074809 | -573.174417     | 105.880         |
| bpa                              | -573.9702118 | -573.741267     | 109.872         |
| bpaH <sup>+</sup>                | -574.3393886 | -574.096334     | 111.157         |
| bpaH <sub>2</sub> <sup>2+</sup>  | -574.6320422 | -574.374741     | 111.043         |

**Table S9.** Total energies  $E_0$ , standard enthalpies  $H^\circ_{298}$  (in Hartree) and standard entropies  $S^\circ_{298}$  (in cal mol<sup>-1</sup> K<sup>-1</sup>) for studied compounds. M06-2X/def2-TZVP level of theory.

| Compound                                                   | $E_0$          | $H^\circ_{298}$ | $S^\circ_{298}$ |
|------------------------------------------------------------|----------------|-----------------|-----------------|
| pyz                                                        | -264.3030778   | -264.220400     | 65.403          |
| bipy                                                       | -495.3502448   | -495.181216     | 89.852          |
| bpe                                                        | -572.7447279   | -572.53976      | 112.221         |
| bpa                                                        | -573.9640089   | -573.735068     | 111.016         |
| AlCl <sub>3</sub>                                          | -1623.236421   | -1623.225297    | 74.733          |
| AlBr <sub>3</sub>                                          | -7965.213645   | -7965.203144    | 83.138          |
| GaCl <sub>3</sub>                                          | -3305.62567    | -3305.615112    | 77.715          |
| GaBr <sub>3</sub>                                          | -9647.616848   | -9647.606823    | 86.056          |
| (AlCl <sub>3</sub> ) <sub>2</sub> (pyz) (C <sub>2h</sub> ) | -3510.88740650 | -3510.777198    | 145.073         |
| (AlBr <sub>3</sub> ) <sub>2</sub> (pyz) (C <sub>i</sub> )  | -16194.8387481 | -16194.729781   | 161.546         |
| (GaCl <sub>3</sub> ) <sub>2</sub> (pyz) (C <sub>2h</sub> ) | -6875.6502852  | -6875.541418    | 152.316         |
| (GaBr <sub>3</sub> ) <sub>2</sub> (pyz) (C <sub>i</sub> )  | -19559.6273145 | -19559.519564   | 170.517         |
| AlCl <sub>3</sub> pyz (C <sub>1</sub> )                    | -1887.601499   | -1887.504738    | 105.769         |
| AlBr <sub>3</sub> pyz (C <sub>1</sub> )                    | -8229.577658   | -8229.481581    | 113.957         |
| GaCl <sub>3</sub> pyz (C <sub>s</sub> )                    | -3569.982173   | -3569.886207    | 111.01          |
| GaBr <sub>3</sub> pyz (C <sub>1</sub> )                    | -9911.970901   | -9911.875387    | 117.387         |
| (AlCl <sub>3</sub> ) <sub>2</sub> (bipy) (C <sub>2</sub> ) | -3741.9550197  | -3741.758069    | 169.174         |
| (AlBr <sub>3</sub> ) <sub>2</sub> (bipy) (C <sub>2</sub> ) | -16425.9067631 | -16425.710976   | 184.546         |
| (GaCl <sub>3</sub> ) <sub>2</sub> (bipy) (C <sub>2</sub> ) | -7106.7169266  | -7106.521293    | 176.992         |
| (GaBr <sub>3</sub> ) <sub>2</sub> (bipy) (C <sub>2</sub> ) | -19790.6937088 | -19790.499144   | 191.008         |
| AlCl <sub>3</sub> bipy (C <sub>1</sub> )                   | -2118.655221   | -2118.472107    | 132.043         |
| AlBr <sub>3</sub> bipy (C <sub>1</sub> )                   | -8460.631536   | -8460.449018    | 138.914         |
| GaCl <sub>3</sub> bipy (C <sub>1</sub> )                   | -3801.035681   | -3800.853278    | 135.522         |
| GaBr <sub>3</sub> bipy (C <sub>1</sub> )                   | -10143.02435   | -10142.84245    | 142.641         |
| (AlCl <sub>3</sub> ) <sub>2</sub> (bpe) (C <sub>2</sub> )  | -3819.3538386  | -3819.120701    | 182.954         |
| (AlBr <sub>3</sub> ) <sub>2</sub> (bpe) (C <sub>2</sub> )  | -16503.3056829 | -16503.073666   | 199.982         |
| (GaCl <sub>3</sub> ) <sub>2</sub> (bpe) (C <sub>2</sub> )  | -7184.1155355  | -7183.883809    | 193.633         |
| (GaBr <sub>3</sub> ) <sub>2</sub> (bpe) (C <sub>2</sub> )  | -19868.0922369 | -19867.861507   | 209.515         |
| AlCl <sub>3</sub> bpe (C <sub>1</sub> )                    | -2196.051316   | -2195.832072    | 143.363         |
| AlBr <sub>3</sub> bpe (C <sub>1</sub> )                    | -8538.027692   | -8537.809033    | 150.966         |
| GaCl <sub>3</sub> bpe (C <sub>1</sub> )                    | -3878.431677   | -3878.213115    | 147.809         |
| GaBr <sub>3</sub> bpe (C <sub>1</sub> )                    | -10220.42038   | -10220.20234    | 155.256         |
| (AlCl <sub>3</sub> ) <sub>2</sub> (bpa) (C <sub>i</sub> )  | -3820.5751489  | -3820.317970    | 189.633         |
| (AlBr <sub>3</sub> ) <sub>2</sub> (bpa) (C <sub>i</sub> )  | -16504.5270901 | -16504.271041   | 203.061         |
| (GaCl <sub>3</sub> ) <sub>2</sub> (bpa) (C <sub>i</sub> )  | -7185.3368607  | -7185.081082    | 196.805         |
| (GaBr <sub>3</sub> ) <sub>2</sub> (bpa) (C <sub>i</sub> )  | -19869.3136580 | -19869.058813   | 210.179         |
| AlCl <sub>3</sub> bpa (C <sub>1</sub> )                    | -2197.270853   | -2197.027616    | 149.329         |
| AlBr <sub>3</sub> bpa (C <sub>1</sub> )                    | -8539.247283   | -8539.004672    | 155.78          |
| GaCl <sub>3</sub> bpa (C <sub>1</sub> )                    | -3879.651277   | -3879.407848    | 153.308         |
| GaBr <sub>3</sub> bpa (C <sub>1</sub> )                    | -10221.64006   | -10221.39798    | 158.43          |

**Table S10.** Thermodynamic data for the gas phase processes of dissociation of  $\text{MX}_3$  complexes. Standard reaction enthalpies  $\Delta_{\text{diss}}\text{H}^\circ_{298}$  and Gibbs energies  $\Delta_{\text{diss}}\text{G}^\circ_{298}$  are in  $\text{kJ mol}^{-1}$ , standard reaction entropies  $\Delta_{\text{diss}}\text{S}^\circ_{298}$  in  $\text{J mol}^{-1} \text{K}^{-1}$ . M06-2X/def2-TZVP level of theory.

| Compound                                                              | $\Delta_{\text{diss}}\text{H}^\circ_{298}$ | $\Delta_{\text{diss}}\text{S}^\circ_{298}$ | $\Delta_{\text{diss}}\text{G}^\circ_{298}$ |
|-----------------------------------------------------------------------|--------------------------------------------|--------------------------------------------|--------------------------------------------|
| $(\text{MX}_3)_2(\text{pyz}) = 2\text{MX}_3 + \text{pyz}$             |                                            |                                            |                                            |
| AlCl <sub>3</sub>                                                     | 278.8                                      | 292.0                                      | 191.8                                      |
| AlBr <sub>3</sub>                                                     | 270.7                                      | 293.4                                      | 183.2                                      |
| GaCl <sub>3</sub>                                                     | 238.4                                      | 286.7                                      | 153.0                                      |
| GaBr <sub>3</sub>                                                     | 224.5                                      | 280.3                                      | 141.0                                      |
| $(\text{MX}_3)_2(\text{pyz}) = \text{MX}_3\text{pyz} + \text{MX}_3$   |                                            |                                            |                                            |
| AlCl <sub>3</sub>                                                     | 123.8                                      | 148.2                                      | 79.7                                       |
| AlBr <sub>3</sub>                                                     | 118.3                                      | 148.7                                      | 74.0                                       |
| GaCl <sub>3</sub>                                                     | 105.3                                      | 152.3                                      | 59.9                                       |
| GaBr <sub>3</sub>                                                     | 98.1                                       | 137.8                                      | 57.0                                       |
| $\text{MX}_3\text{pyz} = \text{MX}_3 + \text{pyz}$                    |                                            |                                            |                                            |
| AlCl <sub>3</sub>                                                     | 155.0                                      | 143.8                                      | 112.2                                      |
| AlBr <sub>3</sub>                                                     | 152.4                                      | 144.7                                      | 109.3                                      |
| GaCl <sub>3</sub>                                                     | 133.1                                      | 134.3                                      | 93.1                                       |
| GaBr <sub>3</sub>                                                     | 126.5                                      | 142.6                                      | 84.0                                       |
| $(\text{MX}_3)_2(\text{bipy}) = 2\text{MX}_3 + \text{bipy}$           |                                            |                                            |                                            |
| AlCl <sub>3</sub>                                                     | 331.5                                      | 293.5                                      | 244.0                                      |
| AlBr <sub>3</sub>                                                     | 324.2                                      | 299.5                                      | 234.9                                      |
| GaCl <sub>3</sub>                                                     | 288.4                                      | 285.7                                      | 203.3                                      |
| GaBr <sub>3</sub>                                                     | 273.8                                      | 296.9                                      | 185.3                                      |
| $(\text{MX}_3)_2(\text{bipy}) = \text{MX}_3\text{bipy} + \text{MX}_3$ |                                            |                                            |                                            |
| AlCl <sub>3</sub>                                                     | 159.3                                      | 157.3                                      | 112.4                                      |
| AlBr <sub>3</sub>                                                     | 154.4                                      | 156.9                                      | 107.7                                      |
| GaCl <sub>3</sub>                                                     | 138.9                                      | 151.6                                      | 93.7                                       |
| GaBr <sub>3</sub>                                                     | 130.9                                      | 157.7                                      | 83.9                                       |
| $\text{MX}_3\text{bipy} = \text{MX}_3 + \text{bipy}$                  |                                            |                                            |                                            |
| AlCl <sub>3</sub>                                                     | 172.2                                      | 136.2                                      | 131.6                                      |
| AlBr <sub>3</sub>                                                     | 169.8                                      | 142.6                                      | 127.3                                      |
| GaCl <sub>3</sub>                                                     | 149.5                                      | 134.1                                      | 109.6                                      |
| GaBr <sub>3</sub>                                                     | 142.9                                      | 139.2                                      | 101.4                                      |

| Compound          | $\Delta_{\text{diss}}\text{H}^{\circ}_{298}$                        | $\Delta_{\text{diss}}\text{S}^{\circ}_{298}$ | $\Delta_{\text{diss}}\text{G}^{\circ}_{298}$ |
|-------------------|---------------------------------------------------------------------|----------------------------------------------|----------------------------------------------|
|                   | $(\text{MX}_3)_2(\text{bpe}) = 2\text{MX}_3 + \text{bpe}$           |                                              |                                              |
| AlCl <sub>3</sub> | 342.2                                                               | 329.4                                        | 244.1                                        |
| AlBr <sub>3</sub> | 335.1                                                               | 328.5                                        | 237.2                                        |
| GaCl <sub>3</sub> | 298.8                                                               | 309.7                                        | 206.6                                        |
| GaBr <sub>3</sub> | 283.8                                                               | 313.0                                        | 190.5                                        |
|                   | $(\text{MX}_3)_2(\text{bpe}) = \text{MX}_3\text{bpe} + \text{MX}_3$ |                                              |                                              |
| AlCl <sub>3</sub> | 166.3                                                               | 147.0                                        | 122.5                                        |
| AlBr <sub>3</sub> | 161.4                                                               | 142.8                                        | 118.9                                        |
| GaCl <sub>3</sub> | 145.9                                                               | 133.4                                        | 106.2                                        |
| GaBr <sub>3</sub> | 137.4                                                               | 133.0                                        | 97.8                                         |
|                   | $\text{MX}_3\text{bpe} = \text{MX}_3 + \text{bpe}$                  |                                              |                                              |
| AlCl <sub>3</sub> | 175.9                                                               | 182.4                                        | 121.6                                        |
| AlBr <sub>3</sub> | 173.6                                                               | 185.7                                        | 118.3                                        |
| GaCl <sub>3</sub> | 152.9                                                               | 176.3                                        | 100.4                                        |
| GaBr <sub>3</sub> | 146.4                                                               | 180.0                                        | 92.8                                         |
|                   | $(\text{MX}_3)_2(\text{bpa}) = 2\text{MX}_3 + \text{bpa}$           |                                              |                                              |
| AlCl <sub>3</sub> | 347.4                                                               | 291.2                                        | 260.6                                        |
| AlBr <sub>3</sub> | 340.5                                                               | 305.3                                        | 249.5                                        |
| GaCl <sub>3</sub> | 304.0                                                               | 286.1                                        | 218.7                                        |
| GaBr <sub>3</sub> | 289.0                                                               | 300.0                                        | 199.7                                        |
|                   | $(\text{MX}_3)_2(\text{bpa}) = \text{MX}_3\text{bpa} + \text{MX}_3$ |                                              |                                              |
| AlCl <sub>3</sub> | 170.8                                                               | 144.1                                        | 127.9                                        |
| AlBr <sub>3</sub> | 166.0                                                               | 150.0                                        | 121.3                                        |
| GaCl <sub>3</sub> | 152.6                                                               | 143.2                                        | 109.9                                        |
| GaBr <sub>3</sub> | 141.8                                                               | 143.5                                        | 99.0                                         |
|                   | $\text{MX}_3\text{bpa} = \text{MX}_3 + \text{bpa}$                  |                                              |                                              |
| AlCl <sub>3</sub> | 176.5                                                               | 147.1                                        | 132.7                                        |
| AlBr <sub>3</sub> | 174.5                                                               | 155.3                                        | 128.2                                        |
| GaCl <sub>3</sub> | 151.4                                                               | 142.9                                        | 108.8                                        |
| GaBr <sub>3</sub> | 147.2                                                               | 156.4                                        | 100.6                                        |

**Table S11.** Charge transfer values for  $(MX_3)_2(L)$  complexes (per two  $MX_3$  units). M06-2X/def2-TZVP level of theory.

| $MX_3 \setminus L$ | <b>pyz</b> | <b>bipy</b> | <b>bpe</b> | <b>bpa</b> |
|--------------------|------------|-------------|------------|------------|
| $AlCl_3$           | 0.695      | 0.818       | 0.843      | 0.854      |
| $AlBr_3$           | 0.683      | 0.818       | 0.840      | 0.857      |
| $GaCl_3$           | 0.525      | 0.648       | 0.679      | 0.691      |
| $GaBr_3$           | 0.517      | 0.654       | 0.677      | 0.695      |

**Table S12.** Charge transfer values for  $MX_3L$  complexes (per one  $MX_3$  unit). M06-2X/def2-TZVP level of theory.

| $MX_3 \setminus L$ | <b>pyz</b> | <b>bipy</b> | <b>bpe</b> | <b>bpa</b> |
|--------------------|------------|-------------|------------|------------|
| $AlCl_3$           | 0.408      | 0.434       | 0.441      | 0.439      |
| $AlBr_3$           | 0.409      | 0.436       | 0.443      | 0.442      |
| $GaCl_3$           | 0.325      | 0.351       | 0.359      | 0.357      |
| $GaBr_3$           | 0.326      | 0.355       | 0.363      | 0.363      |

**Fig. S30.** Optimized structures and xyz coordinates for  $\text{MX}_3$  complexes. M06-2X/def2-TZVP level of theory.

| $(\text{AlCl}_3)_2(\text{pyz}) (\text{C}_{2h})$                                     |    | X         | Y         | Z         |
|-------------------------------------------------------------------------------------|----|-----------|-----------|-----------|
| 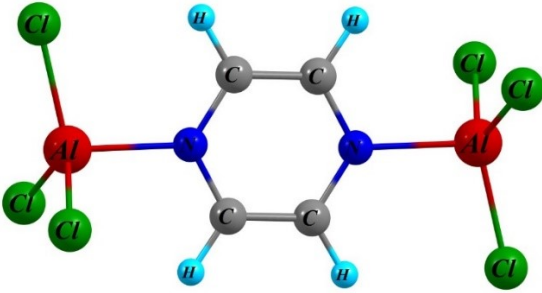   | Cl | -3.239540 | 2.117944  | 1.774395  |
|                                                                                     | Cl | -4.301664 | -0.826949 | 0.000000  |
|                                                                                     | Cl | -3.239540 | 2.117944  | -1.774395 |
|                                                                                     | Al | -3.239540 | 0.988430  | 0.000000  |
|                                                                                     | N  | -1.318717 | 0.353455  | 0.000000  |
|                                                                                     | C  | -0.369220 | 1.288662  | 0.000000  |
|                                                                                     | C  | 0.967833  | 0.931707  | 0.000000  |
|                                                                                     | H  | -0.686761 | 2.323487  | 0.000000  |
|                                                                                     | H  | 1.764210  | 1.663436  | 0.000000  |
|                                                                                     | N  | 1.318717  | -0.353455 | 0.000000  |
|                                                                                     | C  | 0.369220  | -1.288662 | 0.000000  |
|                                                                                     | C  | -0.967833 | -0.931707 | 0.000000  |
|                                                                                     | H  | 0.686761  | -2.323487 | 0.000000  |
|                                                                                     | H  | -1.764210 | -1.663436 | 0.000000  |
|                                                                                     | Cl | 3.239540  | -2.117944 | -1.774395 |
|                                                                                     | Cl | 4.301664  | 0.826949  | 0.000000  |
|                                                                                     | Cl | 3.239540  | -2.117944 | 1.774395  |
|                                                                                     | Al | 3.239540  | -0.988430 | 0.000000  |
| $(\text{AlBr}_3)_2(\text{pyz}) (\text{C}_i)$                                        |    | X         | Y         | Z         |
|  | Br | -1.054381 | 3.204123  | 2.772623  |
|                                                                                     | Br | -3.790912 | 0.480960  | 2.438795  |
|                                                                                     | Br | -3.153372 | 3.007595  | -0.428590 |
|                                                                                     | Al | -2.385375 | 1.948689  | 1.428334  |
|                                                                                     | N  | -0.984499 | 0.744544  | 0.587927  |
|                                                                                     | C  | -0.017973 | 1.334828  | -0.115358 |
|                                                                                     | C  | 0.978878  | 0.582429  | -0.710982 |
|                                                                                     | H  | -0.047097 | 2.413661  | -0.199579 |
|                                                                                     | H  | 1.775913  | 1.032187  | -1.287442 |
|                                                                                     | N  | 0.984499  | -0.744544 | -0.587927 |
|                                                                                     | C  | 0.017973  | -1.334828 | 0.115358  |
|                                                                                     | C  | -0.978878 | -0.582429 | 0.710982  |
|                                                                                     | H  | 0.047097  | -2.413661 | 0.199579  |
|                                                                                     | H  | -1.775913 | -1.032187 | 1.287442  |
|                                                                                     | Br | 1.054381  | -3.204123 | -2.772623 |
|                                                                                     | Br | 3.790912  | -0.480960 | -2.438795 |
|                                                                                     | Br | 3.153372  | -3.007595 | 0.428590  |
|                                                                                     | Al | 2.385375  | -1.948689 | -1.428334 |

**(GaCl<sub>3</sub>)<sub>2</sub>(pyz) (C<sub>2h</sub>)**

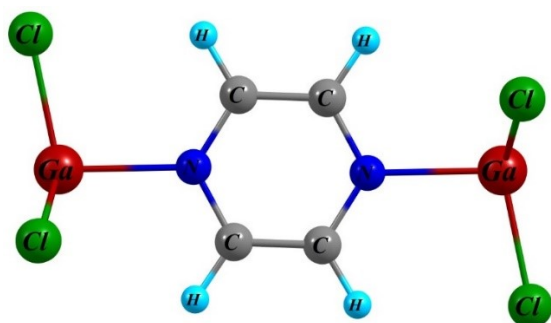

|    | X         | Y         | Z         |
|----|-----------|-----------|-----------|
| Cl | -3.342491 | 2.095398  | 1.826749  |
| Cl | -4.342850 | -0.979257 | 0.000000  |
| Cl | -3.342491 | 2.095398  | -1.826749 |
| Ga | -3.342491 | 0.937978  | 0.000000  |
| N  | -1.322032 | 0.326260  | 0.000000  |
| C  | -0.395243 | 1.281570  | 0.000000  |
| C  | 0.949533  | 0.951112  | 0.000000  |
| H  | -0.734917 | 2.309668  | 0.000000  |
| H  | 1.732709  | 1.698036  | 0.000000  |
| N  | 1.322032  | -0.326260 | 0.000000  |
| C  | 0.395243  | -1.281570 | 0.000000  |
| C  | -0.949533 | -0.951112 | 0.000000  |
| H  | 0.734917  | -2.309668 | 0.000000  |
| H  | -1.732709 | -1.698036 | 0.000000  |
| Cl | 3.342491  | -2.095398 | -1.826749 |
| Cl | 4.342850  | 0.979257  | 0.000000  |
| Cl | 3.342491  | -2.095398 | 1.826749  |
| Ga | 3.342491  | -0.937978 | 0.000000  |

**(GaBr<sub>3</sub>)<sub>2</sub>(pyz) (C<sub>i</sub>)**

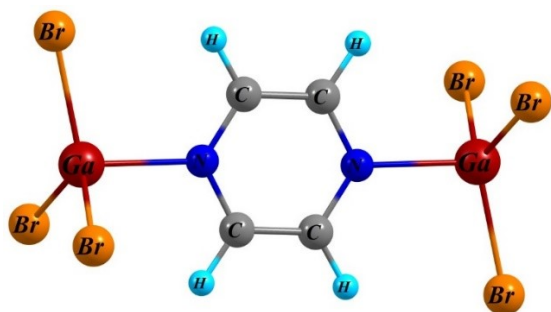

|    | X         | Y         | Z         |
|----|-----------|-----------|-----------|
| Ga | 2.461624  | -1.972085 | 1.479906  |
| Br | 1.089010  | -3.229094 | 2.863493  |
| Br | 3.856868  | -0.406106 | 2.466985  |
| Br | 3.215360  | -3.054132 | -0.427984 |
| N  | 0.984494  | -0.733958 | 0.592575  |
| C  | 0.996787  | 0.593989  | 0.675940  |
| C  | 0.003528  | -1.338397 | -0.073811 |
| H  | 1.809471  | 1.051273  | 1.225278  |
| H  | 0.021844  | -2.420000 | -0.123452 |
| N  | -0.984494 | 0.733958  | -0.592575 |
| C  | -0.996787 | -0.593989 | -0.675940 |
| C  | -0.003528 | 1.338397  | 0.073811  |
| H  | -1.809471 | -1.051273 | -1.225278 |
| H  | -0.021844 | 2.420000  | 0.123452  |
| Ga | -2.461624 | 1.972085  | -1.479906 |
| Br | -1.089010 | 3.229094  | -2.863493 |
| Br | -3.856868 | 0.406106  | -2.466985 |
| Br | -3.215360 | 3.054132  | 0.427984  |



AlCl<sub>3</sub>pyz (C<sub>1</sub>)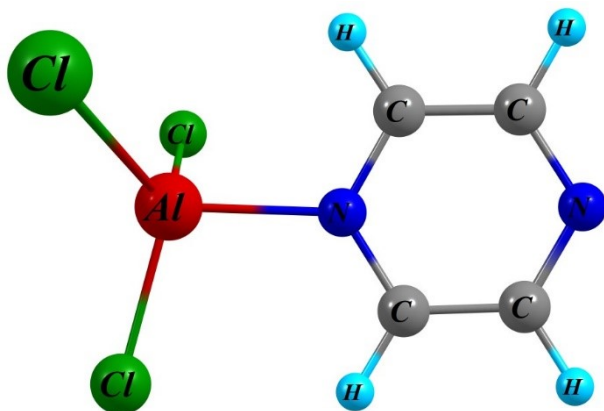

|    | X        | Y        | Z        |
|----|----------|----------|----------|
| Cl | 1.501881 | -1.06775 | 1.773862 |
| Cl | 1.671982 | 2.045458 | -0.00395 |
| Cl | 1.503386 | -1.07562 | -1.76882 |
| Al | 1.124156 | 0.009059 | -0.00024 |
| N  | -0.86719 | 0.071948 | -0.0005  |
| C  | -1.52055 | -1.093   | -0.00025 |
| C  | -2.90467 | -1.11317 | -0.00012 |
| H  | -0.9218  | -1.99509 | -0.00018 |
| H  | -3.43973 | -2.05427 | 0.000026 |
| N  | -3.62398 | 0.003165 | -0.00029 |
| C  | -2.96131 | 1.150767 | -0.00054 |
| C  | -1.57462 | 1.201377 | -0.00051 |
| H  | -3.54157 | 2.06483  | -0.00066 |
| H  | -1.01912 | 2.129646 | -0.00058 |

AlBr<sub>3</sub>pyz (C<sub>1</sub>)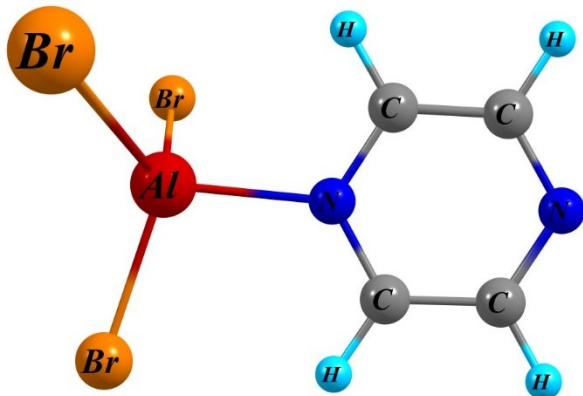

|    | X        | Y        | Z        |
|----|----------|----------|----------|
| Br | 0.853958 | -0.9827  | 2.040902 |
| Br | 1.294545 | 2.14503  | -0.18622 |
| Br | 0.999237 | -1.36655 | -1.76622 |
| Al | 0.566464 | -0.00307 | 0.005628 |
| N  | -1.42297 | 0.145777 | -0.06655 |
| C  | -2.12874 | -0.98928 | -0.07662 |
| C  | -3.51204 | -0.94805 | -0.08548 |
| H  | -1.57241 | -1.91814 | -0.0803  |
| H  | -4.08738 | -1.86492 | -0.09321 |
| N  | -4.18202 | 0.198527 | -0.08478 |
| C  | -3.4689  | 1.315171 | -0.07448 |
| C  | -2.08119 | 1.304944 | -0.0646  |
| H  | -4.00722 | 2.254623 | -0.0737  |
| H  | -1.48784 | 2.209401 | -0.05578 |

**GaCl<sub>3</sub>pyz (C<sub>s</sub>)**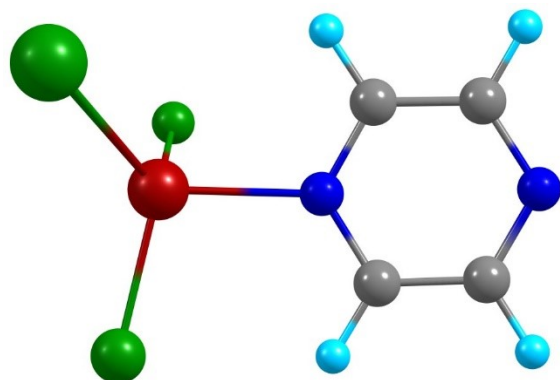

|    | <b>X</b> | <b>Y</b> | <b>Z</b>  |
|----|----------|----------|-----------|
| Cl | 1.10935  | 1.362208 | 1.823842  |
| Cl | -2.11383 | 1.506919 | 0.000000  |
| Cl | 1.10935  | 1.362208 | -1.823842 |
| Ga | -0.00665 | 0.995097 | 0.000000  |
| N  | -0.06573 | -1.07596 | 0.000000  |
| C  | 1.095673 | -1.73097 | 0.000000  |
| C  | 1.10935  | -3.11613 | 0.000000  |
| H  | 2.000858 | -1.13653 | 0.000000  |
| H  | 2.047814 | -3.65599 | 0.000000  |
| N  | -0.01033 | -3.82945 | 0.000000  |
| C  | -1.15542 | -3.16155 | 0.000000  |
| C  | -1.19905 | -1.77455 | 0.000000  |
| H  | -2.07186 | -3.73815 | 0.000000  |
| H  | -2.12449 | -1.21299 | 0.000000  |

**GaBr<sub>3</sub>pyz (C<sub>1</sub>)**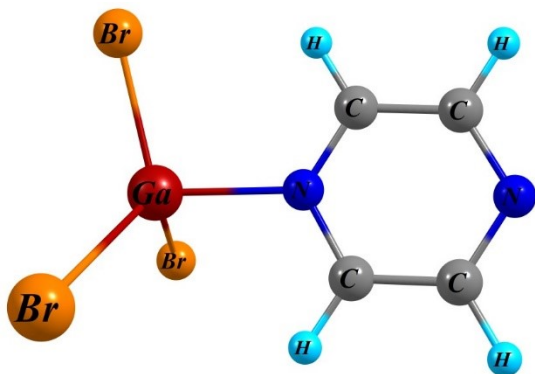

|    | <b>X</b> | <b>Y</b> | <b>Z</b>  |
|----|----------|----------|-----------|
| Ga | 0.544976 | -0.00062 | 0.003753  |
| Br | 0.863529 | -1.03233 | 2.062388  |
| Br | 1.208499 | 2.220936 | -0.177691 |
| Br | 0.93026  | -1.36792 | -1.839126 |
| N  | -1.53163 | 0.130704 | -0.039924 |
| C  | -2.19163 | 1.286717 | -0.027068 |
| C  | -2.22778 | -1.00701 | -0.053039 |
| H  | -1.60073 | 2.193484 | -0.017275 |
| H  | -1.66701 | -1.9334  | -0.067368 |
| N  | -4.28718 | 0.170649 | -0.041586 |
| C  | -3.6124  | -0.97265 | -0.053076 |
| C  | -3.5795  | 1.291263 | -0.028972 |
| H  | -4.18411 | -1.89191 | -0.063064 |
| H  | -4.12302 | 2.227752 | -0.020096 |

(AlCl<sub>3</sub>)<sub>2</sub>(bipy) (C<sub>2</sub>)

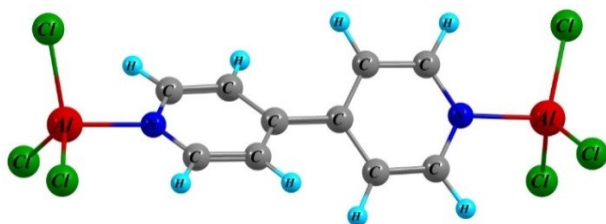

|    | X         | Y         | Z         |
|----|-----------|-----------|-----------|
| Cl | -1.654028 | 5.894276  | -1.217934 |
| Cl | 1.901584  | 6.058061  | -0.750985 |
| Cl | -0.317141 | 5.846932  | 2.061477  |
| Cl | -1.901584 | -6.058061 | -0.750985 |
| Cl | 1.654028  | -5.894276 | -1.217934 |
| Cl | 0.317141  | -5.846932 | 2.061477  |
| Al | 0.015892  | 5.490529  | 0.008462  |
| Al | -0.015892 | -5.490529 | 0.008462  |
| N  | 0.074754  | 3.506323  | -0.043108 |
| N  | -0.074754 | -3.506323 | -0.043108 |
| C  | -1.027287 | 2.854418  | 0.349904  |
| C  | 1.146716  | 2.810870  | -0.433297 |
| C  | 1.154567  | 1.429462  | -0.441295 |
| C  | -1.095037 | 1.477982  | 0.361514  |
| C  | 0.015892  | 0.739580  | -0.039886 |
| C  | -0.015892 | -0.739580 | -0.039886 |
| C  | -1.154567 | -1.429462 | -0.441295 |
| C  | 1.095037  | -1.477982 | 0.361514  |
| C  | -1.146716 | -2.810870 | -0.433297 |
| C  | 1.027287  | -2.854418 | 0.349904  |
| H  | -1.862887 | 3.469526  | 0.660709  |
| H  | 2.003796  | 3.392984  | -0.745254 |
| H  | 2.036286  | 0.905323  | -0.782846 |
| H  | -1.997714 | 0.991686  | 0.704040  |
| H  | -2.036286 | -0.905323 | -0.782846 |
| H  | 1.997714  | -0.991686 | 0.704040  |
| H  | -2.003796 | -3.392984 | -0.745254 |
| H  | 1.862887  | -3.469526 | 0.660709  |

(AlBr<sub>3</sub>)<sub>2</sub>(bipy) (C<sub>2</sub>)

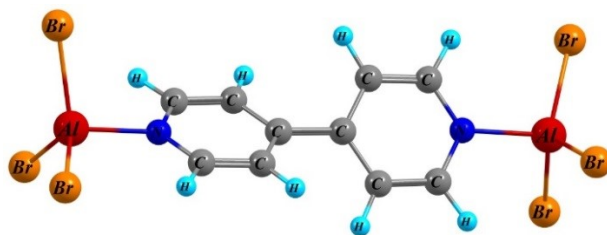

|    | X         | Y         | Z         |
|----|-----------|-----------|-----------|
| Br | -1.700979 | 5.897518  | -1.445238 |
| Br | 2.085910  | 6.152277  | -0.701464 |
| Br | -0.483654 | 5.908810  | 2.178552  |
| Br | -2.085910 | -6.152277 | -0.701464 |
| Br | 1.700979  | -5.897518 | -1.445238 |
| Br | 0.483654  | -5.908810 | 2.178552  |
| Al | 0.019888  | 5.494243  | -0.005672 |
| Al | -0.019888 | -5.494243 | -0.005672 |
| N  | 0.092936  | 3.506767  | -0.028502 |
| N  | -0.092936 | -3.506767 | -0.028502 |
| C  | -1.013270 | 2.859612  | 0.363275  |
| C  | 1.161837  | 2.804967  | -0.416383 |
| C  | 1.162450  | 1.423453  | -0.423079 |
| C  | -1.087770 | 1.484063  | 0.375846  |
| C  | 0.019888  | 0.739408  | -0.023385 |
| C  | -0.019888 | -0.739408 | -0.023385 |
| C  | -1.162450 | -1.423453 | -0.423079 |
| C  | 1.087770  | -1.484063 | 0.375846  |
| C  | -1.161837 | -2.804967 | -0.416383 |
| C  | 1.013270  | -2.859612 | 0.363275  |
| H  | -1.845656 | 3.479110  | 0.673678  |
| H  | 2.023513  | 3.380861  | -0.727415 |
| H  | 2.042380  | 0.895270  | -0.762991 |
| H  | -1.993678 | 1.003288  | 0.717554  |
| H  | -2.042380 | -0.895270 | -0.762991 |
| H  | 1.993678  | -1.003288 | 0.717554  |
| H  | -2.023513 | -3.380861 | -0.727415 |
| H  | 1.845656  | -3.479110 | 0.673678  |

(GaCl<sub>3</sub>)<sub>2</sub>(bipy) (C<sub>2</sub>)

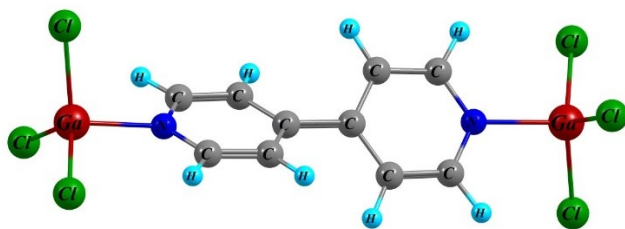

|    | X         | Y         | Z         |
|----|-----------|-----------|-----------|
| Ga | -0.011207 | 5.567739  | -0.013078 |
| Ga | 0.011207  | -5.567739 | -0.013078 |
| Cl | 2.090473  | 6.081903  | -0.189525 |
| Cl | -0.987663 | 5.995198  | 1.879151  |
| Cl | -1.242327 | 5.905760  | -1.766196 |
| Cl | 1.242327  | -5.905760 | -1.766196 |
| Cl | -2.090473 | -6.081903 | -0.189525 |
| Cl | 0.987663  | -5.995198 | 1.879151  |
| N  | 0.054281  | 3.503278  | 0.043220  |
| N  | -0.054281 | -3.503278 | 0.043220  |
| C  | -1.043979 | 2.848714  | 0.433044  |
| C  | -1.103995 | 1.470559  | 0.441058  |
| C  | 0.011207  | 0.739790  | 0.039395  |
| C  | 1.146977  | 1.436925  | -0.360320 |
| C  | 1.130710  | 2.818093  | -0.349153 |
| C  | -1.130710 | -2.818093 | -0.349153 |
| C  | -1.146977 | -1.436925 | -0.360320 |
| C  | -0.011207 | -0.739790 | 0.039395  |
| C  | 1.103995  | -1.470559 | 0.441058  |
| C  | 1.043979  | -2.848714 | 0.433044  |
| H  | -1.878661 | 3.460359  | 0.753061  |
| H  | -2.003666 | 0.977970  | 0.782730  |
| H  | 2.031964  | 0.917815  | -0.701277 |
| H  | 1.986607  | 3.406990  | -0.654115 |
| H  | -1.986607 | -3.406990 | -0.654115 |
| H  | -2.031964 | -0.917815 | -0.701277 |
| H  | 2.003666  | -0.977970 | 0.782730  |
| H  | 1.878661  | -3.460359 | 0.753061  |

(GaBr<sub>3</sub>)<sub>2</sub>(bipy) (C<sub>2</sub>)

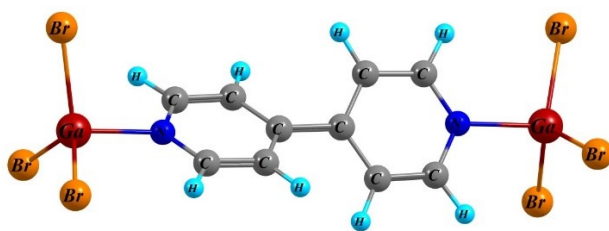

|    | X         | Y         | Z         |
|----|-----------|-----------|-----------|
| Br | -2.119747 | 6.201618  | 0.684125  |
| Br | 1.750977  | 5.946888  | 1.509595  |
| Br | 0.572407  | 5.965834  | -2.221548 |
| Br | -1.750977 | -5.946888 | 1.509595  |
| Br | -0.572407 | -5.965834 | -2.221548 |
| Br | 2.119747  | -6.201618 | 0.684125  |
| Ga | 0.014214  | 5.575381  | 0.004564  |
| Ga | -0.014214 | -5.575381 | 0.004564  |
| N  | -0.066710 | 3.503685  | 0.022021  |
| N  | 0.066710  | -3.503685 | 0.022021  |
| C  | -1.141037 | 2.814145  | 0.410062  |
| C  | 1.034303  | 2.852597  | -0.368012 |
| C  | -1.152407 | 1.432364  | 0.418354  |
| C  | 1.099126  | 1.475424  | -0.379700 |
| C  | -0.014214 | 0.739652  | 0.019405  |
| C  | 0.014214  | -0.739652 | 0.019405  |
| C  | -1.099126 | -1.475424 | -0.379700 |
| C  | 1.152407  | -1.432364 | 0.418354  |
| C  | -1.034303 | -2.852597 | -0.368012 |
| C  | 1.141037  | -2.814145 | 0.410062  |
| H  | -1.998626 | 3.398333  | 0.719424  |
| H  | 1.870972  | 3.466548  | -0.679114 |
| H  | -2.036103 | 0.910132  | 0.757956  |
| H  | 2.001381  | 0.987046  | -0.720575 |
| H  | -2.001381 | -0.987046 | -0.720575 |
| H  | 2.036103  | -0.910132 | 0.757956  |
| H  | -1.870972 | -3.466548 | -0.679114 |
| H  | 1.998626  | -3.398333 | 0.719424  |

AlCl<sub>3</sub>bipy (C<sub>1</sub>)

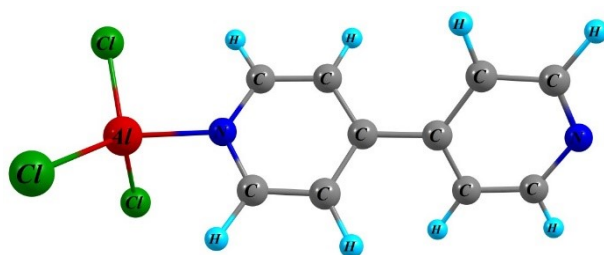

|    | X        | Y        | Z         |
|----|----------|----------|-----------|
| Cl | -3.30857 | -1.53057 | -1.402953 |
| Cl | -3.51406 | 1.949918 | -0.567112 |
| Cl | -3.33311 | -0.55074 | 1.995612  |
| Al | -2.91988 | 0.002615 | -0.001682 |
| N  | -0.94789 | 0.085305 | -0.014817 |
| N  | 6.099443 | -0.03154 | 0.004116  |
| C  | -0.28787 | -1.02524 | 0.342591  |
| C  | -0.25336 | 1.172202 | -0.368479 |
| C  | 1.126537 | 1.185234 | -0.374073 |
| C  | 1.087642 | -1.085   | 0.356885  |
| C  | 1.827423 | 0.039767 | -0.006830 |
| C  | 3.305621 | 0.015342 | -0.002822 |
| C  | 4.005954 | -1.11955 | -0.398423 |
| C  | 4.041663 | 1.126059 | 0.396511  |
| C  | 5.392537 | -1.08896 | -0.380881 |
| C  | 5.426497 | 1.048942 | 0.385703  |
| H  | -0.89828 | -1.87427 | 0.625207  |
| H  | -0.83776 | 2.037056 | -0.653512 |
| H  | 1.64764  | 2.079443 | -0.686354 |
| H  | 1.577711 | -1.99556 | 0.671973  |
| H  | 3.48716  | -2.00545 | -0.741021 |
| H  | 3.551367 | 2.028733 | 0.737249  |
| H  | 5.96023  | -1.95826 | -0.693838 |
| H  | 6.021247 | 1.898832 | 0.70166   |

AlBr<sub>3</sub>bipy (C<sub>1</sub>)

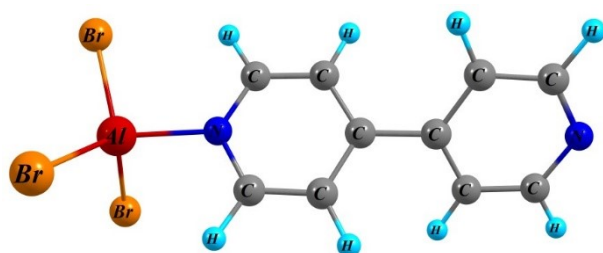

|    | X        | Y        | Z         |
|----|----------|----------|-----------|
| Br | -2.36898 | -1.68156 | -1.484519 |
| Br | -2.663   | 2.082611 | -0.676313 |
| Br | -2.4626  | -0.5297  | 2.15633   |
| Al | -1.97859 | 0.01267  | -0.006058 |
| N  | -0.0043  | 0.106957 | 0.002702  |
| N  | 7.043366 | -0.00246 | -0.013642 |
| C  | 0.658248 | -1.00464 | 0.355581  |
| C  | 0.689596 | 1.198304 | -0.339446 |
| C  | 2.069331 | 1.213744 | -0.343316 |
| C  | 2.033502 | -1.06183 | 0.369635  |
| C  | 2.771995 | 0.065988 | 0.012069  |
| C  | 4.249992 | 0.041934 | 0.006561  |
| C  | 4.947134 | -1.0867  | -0.411737 |
| C  | 4.988625 | 1.147511 | 0.415083  |
| C  | 6.333811 | -1.05493 | -0.407152 |
| C  | 6.373352 | 1.071684 | 0.390343  |
| H  | 0.050392 | -1.85755 | 0.632143  |
| H  | 0.10497  | 2.064615 | -0.619139 |
| H  | 2.588556 | 2.111569 | -0.648202 |
| H  | 2.524766 | -1.97416 | 0.677654  |
| H  | 4.42559  | -1.9678  | -0.762507 |
| H  | 4.500756 | 2.044888 | 0.772879  |
| H  | 6.899279 | -1.9189  | -0.738432 |
| H  | 6.97054  | 1.917406 | 0.712808  |



GaCl<sub>3</sub>bipy (C<sub>1</sub>)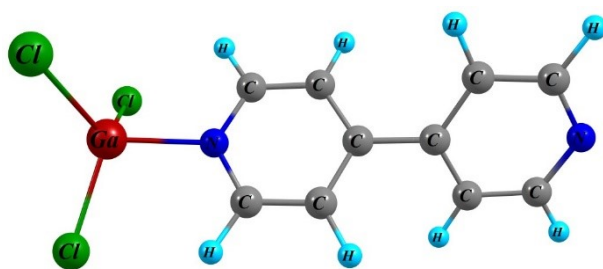

|    | X        | Y        | Z         |
|----|----------|----------|-----------|
| Ga | -2.63955 | 0.001881 | -0.005583 |
| Cl | -3.18883 | 2.090199 | -0.258050 |
| Cl | -3.08512 | -0.90256 | 1.920359  |
| Cl | -3.00607 | -1.29827 | -1.707083 |
| N  | -0.59086 | 0.073241 | 0.036721  |
| N  | 6.452694 | -0.02884 | -0.018528 |
| C  | 0.069711 | -1.03516 | 0.390351  |
| C  | 1.44664  | -1.09205 | 0.391946  |
| C  | 2.180275 | 0.033265 | 0.018950  |
| C  | 1.474319 | 1.177914 | -0.342849 |
| C  | 0.094538 | 1.161716 | -0.324704 |
| C  | 5.743595 | -1.08826 | -0.394069 |
| C  | 4.356997 | -1.12188 | -0.395513 |
| C  | 3.658678 | 0.011764 | 0.007078  |
| C  | 4.396951 | 1.12445  | 0.396601  |
| C  | 5.781752 | 1.050515 | 0.369657  |
| H  | -0.53771 | -1.88269 | 0.684549  |
| H  | 1.942063 | -2.00071 | 0.704358  |
| H  | 1.991465 | 2.072662 | -0.660334 |
| H  | -0.4959  | 2.025835 | -0.602116 |
| H  | 6.309662 | -1.95666 | -0.712426 |
| H  | 3.836175 | -2.0092  | -0.731328 |
| H  | 3.908756 | 2.026542 | 0.74189   |
| H  | 6.378226 | 1.902117 | 0.677586  |

GaBr<sub>3</sub>bipy (C<sub>1</sub>)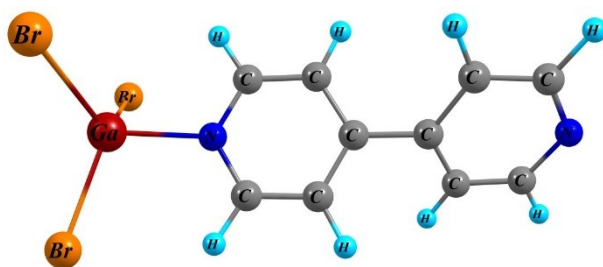

|    | X        | Y         | Z         |
|----|----------|-----------|-----------|
| Br | -2.50084 | 2.147349  | -0.683367 |
| Br | -2.23242 | -1.71897  | -1.520962 |
| Br | -2.31411 | -0.55501  | 2.20624   |
| Ga | -1.85805 | 0.013223  | -0.006034 |
| N  | 0.19748  | 0.099302  | -0.000340 |
| N  | 7.241204 | -0.00213  | -0.010083 |
| C  | 0.885827 | 1.194304  | -0.333435 |
| C  | 0.856051 | -1.01453  | 0.341709  |
| C  | 2.266032 | 1.211641  | -0.337444 |
| C  | 2.232463 | -1.07108  | 0.355396  |
| C  | 2.969136 | 0.060891  | 0.008551  |
| C  | 4.447451 | 0.03878   | 0.004844  |
| C  | 5.184072 | 1.140028  | 0.428216  |
| C  | 5.146969 | -1.08372  | -0.425688 |
| C  | 6.568955 | 1.066273  | 0.405241  |
| C  | 6.533587 | -1.05053  | -0.417629 |
| H  | 0.29847  | 2.06211   | -0.605368 |
| H  | 0.247164 | -1.86963  | 0.610221  |
| H  | 2.785432 | 2.112188  | -0.634122 |
| H  | 2.725413 | -1.98539  | 0.654975  |
| H  | 4.694367 | 2.032398  | 0.795888  |
| H  | 4.627209 | -1.96116  | -0.788107 |
| H  | 7.164455 | 1.908869  | 0.738934  |
| H  | 7.10067  | -1.909999 | -0.757852 |

(AlCl<sub>3</sub>)<sub>2</sub>(bpe) (C<sub>2</sub>)

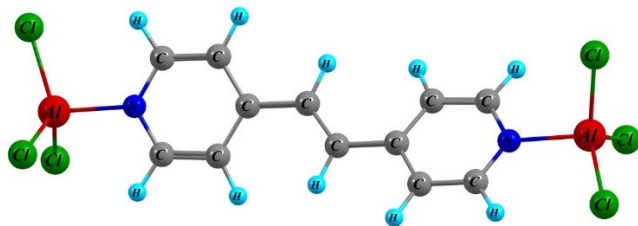

|    | X         | Y         | Z         |
|----|-----------|-----------|-----------|
| Al | -0.052867 | 6.627066  | -0.023569 |
| Cl | -1.957732 | 7.330206  | -0.604356 |
| Cl | 0.517520  | 7.011385  | 1.973520  |
| Cl | 1.508817  | 6.890345  | -1.421603 |
| N  | -0.261505 | 4.660060  | -0.015103 |
| C  | 0.818046  | 3.932567  | 0.311037  |
| H  | 1.716315  | 4.490976  | 0.544034  |
| C  | 0.789496  | 2.558642  | 0.354918  |
| H  | 1.683780  | 2.027661  | 0.646716  |
| C  | -0.395796 | 1.885636  | 0.047225  |
| C  | -1.508817 | 2.658352  | -0.276001 |
| H  | -2.455135 | 2.192602  | -0.514877 |
| C  | -1.406608 | 4.035185  | -0.301702 |
| H  | -2.245603 | 4.670522  | -0.553077 |
| C  | -0.514014 | 0.425079  | 0.057304  |
| H  | -1.529086 | 0.044443  | 0.024099  |
| N  | 0.261505  | -4.660060 | -0.015103 |
| C  | -0.818046 | -3.932567 | 0.311037  |
| H  | -1.716315 | -4.490976 | 0.544034  |
| C  | -0.789496 | -2.558642 | 0.354918  |
| H  | -1.683780 | -2.027661 | 0.646716  |
| C  | 0.395796  | -1.885636 | 0.047225  |
| C  | 1.508817  | -2.658352 | -0.276001 |
| H  | 2.455135  | -2.192602 | -0.514877 |
| C  | 1.406608  | -4.035185 | -0.301702 |
| H  | 2.245603  | -4.670522 | -0.553077 |
| C  | 0.514014  | -0.425079 | 0.057304  |
| H  | 1.529086  | -0.044443 | 0.024099  |
| Al | 0.052867  | -6.627066 | -0.023569 |
| Cl | 1.957732  | -7.330206 | -0.604356 |
| Cl | -0.517520 | -7.011385 | 1.973520  |
| Cl | -1.508817 | -6.890345 | -1.421603 |

(AlBr<sub>3</sub>)<sub>2</sub>(bpe) (C<sub>2</sub>)

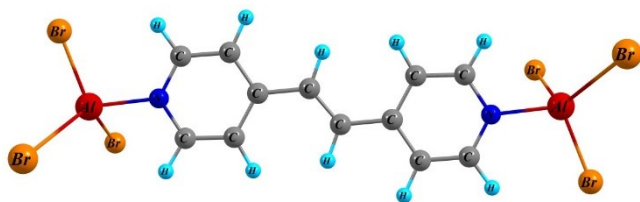

|    | X        | Y         | Z         |
|----|----------|-----------|-----------|
| Br | -1.97545 | 7.513598  | 0.000097  |
| Br | 1.336503 | 6.947015  | -1.910206 |
| Br | 1.336259 | 6.946391  | 1.910529  |
| Al | 0.128423 | 6.638594  | 0.000038  |
| N  | -0.13921 | 4.675789  | -0.000246 |
| C  | 0.910252 | 2.539944  | -0.000968 |
| H  | 1.837166 | 1.98611   | -0.001562 |
| C  | 0.966249 | 3.912754  | -0.000882 |
| H  | 1.910737 | 4.442497  | -0.001358 |
| C  | -0.33306 | 1.900858  | -0.000354 |
| C  | -1.46745 | 2.70933   | 0.000282  |
| H  | -2.4571  | 2.273298  | 0.000750  |
| C  | -0.49698 | 0.445065  | -0.000373 |
| H  | -1.52642 | 0.105118  | -0.000304 |
| C  | -1.3365  | 4.084204  | 0.000327  |
| H  | -2.19512 | 4.74283   | 0.000808  |
| N  | 0.139209 | -4.67579  | -0.000246 |
| C  | -0.91025 | -2.53994  | -0.000968 |
| H  | -1.83717 | -1.98611  | -0.001562 |
| C  | -0.96625 | -3.91275  | -0.000882 |
| H  | -1.91074 | -4.4425   | -0.001358 |
| C  | 0.333059 | -1.90086  | -0.000354 |
| C  | 1.467454 | -2.70933  | 0.000282  |
| H  | 2.457096 | -2.273298 | 0.00075   |
| C  | 0.496977 | -0.44507  | -0.000373 |
| H  | 1.526419 | -0.10512  | -0.000304 |
| C  | 1.336503 | -4.0842   | 0.000327  |
| H  | 2.195122 | -4.74283  | 0.000808  |
| Br | 1.97545  | -7.5136   | 0.000097  |
| Br | -1.33626 | -6.94639  | 1.910529  |
| Br | -1.3365  | -6.94702  | -1.910206 |
| Al | -0.12842 | -6.63859  | 0.000038  |

(GaCl<sub>3</sub>)<sub>2</sub>(bpe) (C<sub>2</sub>)

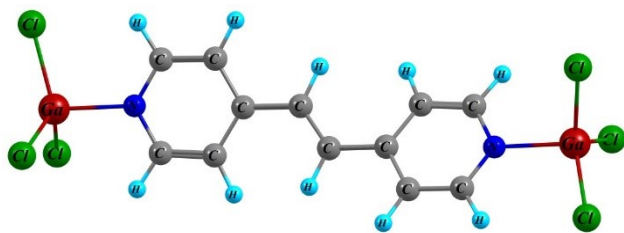

|    | X         | Y         | Z         |
|----|-----------|-----------|-----------|
| Ga | -0.059688 | 6.703570  | -0.020839 |
| Cl | -2.049915 | 7.375145  | -0.571300 |
| Cl | 0.578754  | 7.077330  | 2.021326  |
| Cl | 1.511287  | 6.959918  | -1.498827 |
| N  | -0.262965 | 4.656783  | -0.006073 |
| C  | 0.818926  | 3.933555  | 0.311635  |
| H  | 1.717978  | 4.492723  | 0.540828  |
| C  | 0.791404  | 2.558607  | 0.353046  |
| H  | 1.687481  | 2.027023  | 0.638323  |
| C  | -0.395471 | 1.886232  | 0.051131  |
| C  | -1.511287 | 2.658814  | -0.264511 |
| H  | -2.458516 | 2.192324  | -0.498575 |
| C  | -1.409638 | 4.036044  | -0.287618 |
| H  | -2.250230 | 4.673152  | -0.532046 |
| C  | -0.513659 | 0.425435  | 0.060014  |
| H  | -1.528956 | 0.045350  | 0.027432  |
| N  | 0.262965  | -4.656783 | -0.006073 |
| C  | -0.818926 | -3.933555 | 0.311635  |
| H  | -1.717978 | -4.492723 | 0.540828  |
| C  | -0.791404 | -2.558607 | 0.353046  |
| H  | -1.687481 | -2.027023 | 0.638323  |
| C  | 0.395471  | -1.886232 | 0.051131  |
| C  | 1.511287  | -2.658814 | -0.264511 |
| H  | 2.458516  | -2.192324 | -0.498575 |
| C  | 1.409638  | -4.036044 | -0.287618 |
| H  | 2.250230  | -4.673152 | -0.532046 |
| C  | 0.513659  | -0.425435 | 0.060014  |
| H  | 1.528956  | -0.045350 | 0.027432  |
| Ga | 0.059688  | -6.703570 | -0.020839 |
| Cl | 2.049915  | -7.375145 | -0.571300 |
| Cl | -0.578754 | -7.077330 | 2.021326  |
| Cl | -1.511287 | -6.959918 | -1.498827 |

(GaBr<sub>3</sub>)<sub>2</sub>(bpe) (C<sub>2</sub>)

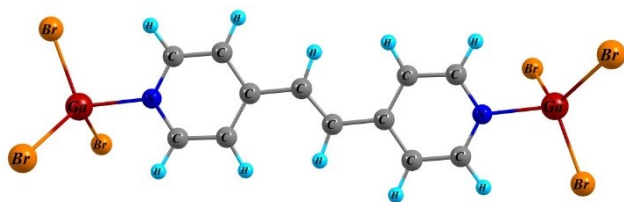

|    | X        | Y         | Z         |
|----|----------|-----------|-----------|
| Br | -2.06414 | 7.546128  | 0.000053  |
| Br | 1.344469 | 7.011771  | -1.954694 |
| Br | 1.344341 | 7.011432  | 1.954866  |
| Ga | 0.111571 | 6.719455  | 0.000024  |
| N  | -0.14866 | 4.671818  | -0.000161 |
| C  | 0.905791 | 2.542084  | -0.000841 |
| H  | 1.833478 | 1.989409  | -0.001458 |
| C  | 0.958353 | 3.916186  | -0.000795 |
| H  | 1.901315 | 4.449327  | -0.001329 |
| C  | -0.33619 | 1.900895  | -0.000178 |
| C  | -1.47306 | 2.706465  | 0.000458  |
| H  | -2.46139 | 2.267255  | 0.000946  |
| C  | -0.49739 | 0.444465  | -0.000173 |
| H  | -1.52635 | 0.102957  | -0.000110 |
| C  | -1.34447 | 4.081961  | 0.000455  |
| H  | -2.20384 | 4.740625  | 0.000922  |
| N  | 0.148663 | -4.67182  | -0.000161 |
| C  | -0.90579 | -2.54208  | -0.000841 |
| H  | -1.83348 | -1.98941  | -0.001458 |
| C  | -0.95835 | -3.91619  | -0.000795 |
| H  | -1.90132 | -4.44933  | -0.001329 |
| C  | 0.336194 | -1.9009   | -0.000178 |
| C  | 1.47306  | -2.70647  | 0.000458  |
| H  | 2.461385 | -2.267255 | 0.000946  |
| C  | 0.497392 | -0.44447  | -0.000173 |
| H  | 1.526348 | -0.10296  | -0.00011  |
| C  | 1.344469 | -4.08196  | 0.000455  |
| H  | 2.203837 | -4.74063  | 0.000922  |
| Br | 2.064135 | -7.54613  | 0.000053  |
| Br | -1.34434 | -7.01143  | 1.954866  |
| Br | -1.34447 | -7.01177  | -1.954694 |
| Ga | -0.11157 | -6.71946  | 0.000024  |

AlCl<sub>3</sub>bpe (C<sub>1</sub>)

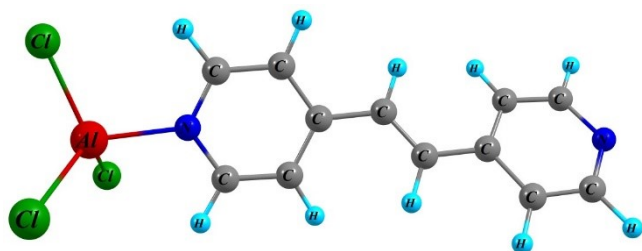

|    | X        | Y         | Z         |
|----|----------|-----------|-----------|
| Al | 3.826299 | -0.0926   | -0.015059 |
| Cl | 4.61194  | 1.775646  | -0.618425 |
| Cl | 4.212033 | -0.65072  | 1.986605  |
| Cl | 4.053346 | -1.68008  | -1.393990 |
| N  | 1.877617 | 0.187707  | -0.013024 |
| C  | 1.101476 | -0.86788  | 0.282082  |
| H  | 1.620027 | -1.79516  | 0.493912  |
| C  | -0.26936 | -0.78324  | 0.320039  |
| H  | -0.83785 | -1.66272  | 0.584853  |
| C  | -0.89547 | 0.435726  | 0.040208  |
| C  | -0.0708  | 1.522677  | -0.248784 |
| H  | -0.49596 | 2.493729  | -0.463647 |
| C  | 1.299173 | 1.364999  | -0.270995 |
| H  | 1.969276 | 2.183605  | -0.498638 |
| C  | -2.34698 | 0.616467  | 0.043823  |
| H  | -2.68451 | 1.646734  | 0.014731  |
| N  | -7.4918  | 0.021509  | -0.055041 |
| C  | -6.71723 | 1.059644  | 0.254069  |
| H  | -7.23039 | 1.988618  | 0.477209  |
| C  | -5.33517 | 1.001     | 0.30557   |
| H  | -4.77444 | 1.882904  | 0.584254  |
| C  | -4.69851 | -0.20597  | 0.018714  |
| C  | -5.50885 | -1.29464  | -0.291841 |
| H  | -5.07206 | -2.260094 | -0.514907 |
| C  | -6.88624 | -1.12997  | -0.32002  |
| H  | -7.5303  | -1.96704  | -0.566292 |
| C  | -3.2422  | -0.37385  | 0.033666  |
| H  | -2.89984 | -1.40348  | 0.000334  |

AlBr<sub>3</sub>bpe (C<sub>1</sub>)

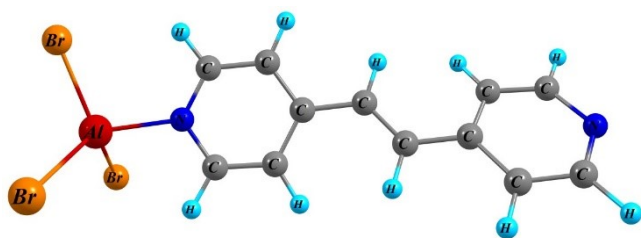

|    | X        | Y         | Z         |
|----|----------|-----------|-----------|
| Al | 2.718731 | -0.03228  | -0.012605 |
| Br | 3.610164 | 1.971848  | -0.641841 |
| Br | 3.156323 | -0.67897  | 2.132057  |
| Br | 2.936928 | -1.71643  | -1.539504 |
| N  | 0.769181 | 0.259652  | 0.017686  |
| C  | -0.00432 | -0.80036  | 0.307754  |
| H  | 0.51628  | -1.72786  | 0.513253  |
| C  | -1.3748  | -0.72007  | 0.348212  |
| H  | -1.93969 | -1.60338  | 0.607782  |
| C  | -2.00574 | 0.498501  | 0.076934  |
| C  | -1.18452 | 1.590879  | -0.200559 |
| H  | -1.61238 | 2.562816  | -0.405826 |
| C  | 0.185856 | 1.437931  | -0.226684 |
| H  | 0.851223 | 2.26227   | -0.447840 |
| C  | -3.45794 | 0.671463  | 0.076262  |
| H  | -3.80163 | 1.699926  | 0.061415  |
| N  | -8.59745 | 0.037638  | -0.077107 |
| C  | -7.83382 | 1.078957  | 0.24846   |
| H  | -8.35625 | 2.001588  | 0.476205  |
| C  | -6.45183 | 1.030835  | 0.310727  |
| H  | -5.9003  | 1.914652  | 0.601461  |
| C  | -5.80329 | -0.16834  | 0.017546  |
| C  | -6.60222 | -1.2603   | -0.310477 |
| H  | -6.15593 | -2.219941 | -0.539633 |
| C  | -7.98067 | -1.10626  | -0.348363 |
| H  | -8.61569 | -1.94615  | -0.608154 |
| C  | -4.34596 | -0.3249   | 0.042256  |
| H  | -3.99522 | -1.35109  | -0.006176 |



GaCl<sub>3</sub>bpe (C<sub>1</sub>)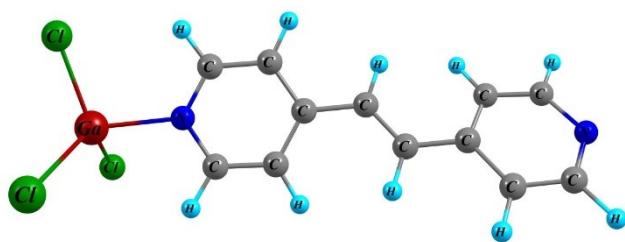

|    | X        | Y         | Z         |
|----|----------|-----------|-----------|
| Ga | 3.484478 | -0.07554  | -0.009798 |
| Cl | 4.235802 | 1.860351  | -0.654238 |
| Cl | 3.852459 | -0.61264  | 2.063838  |
| Cl | 3.721808 | -1.73225  | -1.399002 |
| N  | 1.457257 | 0.19002   | -0.025801 |
| C  | 0.685801 | -0.87378  | 0.239452  |
| H  | 1.205217 | -1.80621  | 0.426099  |
| C  | -0.68603 | -0.79109  | 0.276625  |
| H  | -1.25411 | -1.67763  | 0.517565  |
| C  | -1.31211 | 0.434076  | 0.026236  |
| C  | -0.488   | 1.528687  | -0.235867 |
| H  | -0.9143  | 2.503976  | -0.428489 |
| C  | 0.882554 | 1.37278   | -0.257214 |
| H  | 1.554639 | 2.196469  | -0.463019 |
| C  | -2.76393 | 0.615089  | 0.033725  |
| H  | -3.10013 | 1.645943  | 0.011846  |
| N  | -7.91133 | 0.018267  | -0.041695 |
| C  | -7.13531 | 1.062178  | 0.243652  |
| H  | -7.64743 | 1.994737  | 0.453922  |
| C  | -5.75295 | 1.005554  | 0.286172  |
| H  | -5.19177 | 1.893166  | 0.544792  |
| C  | -5.11703 | -0.20571  | 0.015727  |
| C  | -5.92885 | -1.29995  | -0.270367 |
| H  | -5.49291 | -2.268861 | -0.479739 |
| C  | -7.30664 | -1.13706  | -0.291054 |
| H  | -7.95167 | -1.97888  | -0.518101 |
| C  | -3.66066 | -0.37378  | 0.02352   |
| H  | -3.32007 | -1.40384  | -0.01249  |

GaBr<sub>3</sub>bpe (C<sub>1</sub>)

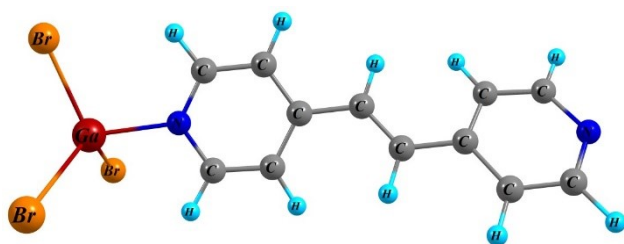

|    | X        | Y         | Z         |
|----|----------|-----------|-----------|
| Ga | 2.550639 | -0.03062  | -0.012532 |
| Br | 3.404478 | 2.025352  | -0.698353 |
| Br | 2.965402 | -0.63374  | 2.200239  |
| Br | 2.763153 | -1.79351  | -1.526270 |
| N  | 0.519104 | 0.25506   | 0.002061  |
| C  | -0.25093 | -0.8091   | 0.272144  |
| H  | 0.268905 | -1.74115  | 0.459375  |
| C  | -1.62243 | -0.72843  | 0.313265  |
| H  | -2.18826 | -1.61556  | 0.557388  |
| C  | -2.25159 | 0.494928  | 0.062085  |
| C  | -1.4296  | 1.59129   | -0.198335 |
| H  | -1.8573  | 2.56641   | -0.388765 |
| C  | -0.05874 | 1.437329  | -0.224356 |
| H  | 0.609234 | 2.26422   | -0.431300 |
| C  | -3.70413 | 0.669487  | 0.065476  |
| H  | -4.04615 | 1.698603  | 0.05828   |
| N  | -8.84657 | 0.035538  | -0.064589 |
| C  | -8.08108 | 1.080589  | 0.244327  |
| H  | -8.60231 | 2.005536  | 0.465389  |
| C  | -6.6987  | 1.033813  | 0.297708  |
| H  | -6.14612 | 1.921395  | 0.574473  |
| C  | -6.05131 | -0.16808  | 0.013165  |
| C  | -6.85215 | -1.26363  | -0.29791  |
| H  | -6.40694 | -2.225532 | -0.51964  |
| C  | -8.23091 | -1.11088  | -0.327711 |
| H  | -8.86724 | -1.95383  | -0.574145 |
| C  | -4.59388 | -0.32513  | 0.030338  |
| H  | -4.24491 | -1.35166  | -0.022609 |

(AlCl<sub>3</sub>)<sub>2</sub>(bpa) (C<sub>i</sub>)

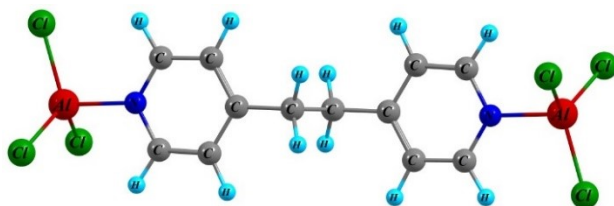

|    | X         | Y         | Z         |
|----|-----------|-----------|-----------|
| Al | 6.520456  | 0.035475  | 0.460413  |
| Cl | 7.115575  | 2.061628  | 0.403925  |
| Cl | 7.017595  | -1.037543 | 2.210825  |
| Cl | 6.800169  | -1.065548 | -1.321450 |
| N  | 4.549613  | 0.124887  | 0.575407  |
| C  | 3.890857  | -1.038569 | 0.669031  |
| H  | 4.501832  | -1.932635 | 0.694485  |
| C  | 2.515935  | -1.093586 | 0.733275  |
| H  | 2.024859  | -2.054368 | 0.814235  |
| C  | 1.778587  | 0.087063  | 0.702175  |
| C  | 2.477929  | 1.284329  | 0.607672  |
| H  | 1.957121  | 2.232560  | 0.587505  |
| C  | 3.857464  | 1.268292  | 0.546868  |
| H  | 4.442580  | 2.175689  | 0.475709  |
| C  | 0.278029  | 0.061719  | 0.716463  |
| H  | -0.107528 | 0.973615  | 1.175800  |
| H  | -0.075924 | -0.780795 | 1.313484  |
| N  | -4.549613 | -0.124887 | -0.575407 |
| C  | -3.890857 | 1.038569  | -0.669031 |
| H  | -4.501832 | 1.932635  | -0.694485 |
| C  | -2.515935 | 1.093586  | -0.733275 |
| H  | -2.024859 | 2.054368  | -0.814235 |
| C  | -1.778587 | -0.087063 | -0.702175 |
| C  | -2.477929 | -1.284329 | -0.607672 |
| H  | -1.957121 | -2.232560 | -0.587505 |
| C  | -3.857464 | -1.268292 | -0.546868 |
| H  | -4.442580 | -2.175689 | -0.475709 |
| C  | -0.278029 | -0.061719 | -0.716463 |
| H  | 0.107528  | -0.973615 | -1.175800 |
| H  | 0.075924  | 0.780795  | -1.313484 |
| Al | -6.520456 | -0.035475 | -0.460413 |
| Cl | -7.115575 | -2.061628 | -0.403925 |
| Cl | -7.017595 | 1.037543  | -2.210825 |
| Cl | -6.800169 | 1.065548  | 1.321450  |

(AlBr<sub>3</sub>)<sub>2</sub>(bpa) (C<sub>i</sub>)

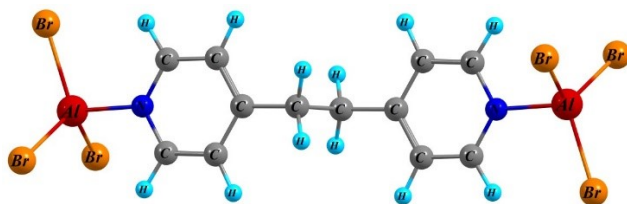

|    | X         | Y         | Z         |
|----|-----------|-----------|-----------|
| Al | 6.521186  | 0.038810  | 0.459296  |
| Br | 7.207079  | 2.212353  | 0.397747  |
| Br | 7.076045  | -1.124125 | 2.341283  |
| Br | 6.805821  | -1.143862 | -1.471698 |
| N  | 4.548040  | 0.130525  | 0.585846  |
| C  | 3.890618  | -1.034448 | 0.681914  |
| H  | 4.502376  | -1.927912 | 0.710169  |
| C  | 2.516089  | -1.091942 | 0.744208  |
| H  | 2.027626  | -2.053908 | 0.826565  |
| C  | 1.775687  | 0.086764  | 0.708375  |
| C  | 2.472819  | 1.284975  | 0.612689  |
| H  | 1.950635  | 2.232368  | 0.589202  |
| C  | 3.852354  | 1.272121  | 0.553799  |
| H  | 4.433654  | 2.181750  | 0.480413  |
| C  | 0.275284  | 0.058520  | 0.717899  |
| H  | -0.113468 | 0.967462  | 1.180400  |
| H  | -0.079130 | -0.787652 | 1.309379  |
| N  | -4.548040 | -0.130525 | -0.585846 |
| C  | -3.890618 | 1.034448  | -0.681914 |
| H  | -4.502376 | 1.927912  | -0.710169 |
| C  | -2.516089 | 1.091942  | -0.744208 |
| H  | -2.027626 | 2.053908  | -0.826565 |
| C  | -1.775687 | -0.086764 | -0.708375 |
| C  | -2.472819 | -1.284975 | -0.612689 |
| H  | -1.950635 | -2.232368 | -0.589202 |
| C  | -3.852354 | -1.272121 | -0.553799 |
| H  | -4.433654 | -2.181750 | -0.480413 |
| C  | -0.275284 | -0.058520 | -0.717899 |
| H  | 0.113468  | -0.967462 | -1.180400 |
| H  | 0.079130  | 0.787652  | -1.309379 |
| Al | -6.521186 | -0.038810 | -0.459296 |
| Br | -7.207079 | -2.212353 | -0.397747 |
| Br | -7.076045 | 1.124125  | -2.341283 |
| Br | -6.805821 | 1.143862  | 1.471698  |

(GaCl<sub>3</sub>)<sub>2</sub>(bpa) (C<sub>i</sub>)

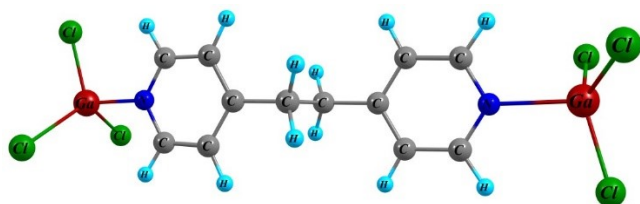

|    | X        | Y         | Z         |
|----|----------|-----------|-----------|
| Ga | -6.5706  | -0.02648  | 0.725175  |
| Cl | -7.07917 | 2.015222  | 1.265982  |
| Cl | -7.39656 | -0.79009  | -1.132676 |
| Cl | -6.52567 | -1.4833   | 2.337121  |
| N  | -4.57444 | 0.111533  | 0.259292  |
| C  | -3.95813 | -1.00524  | -0.143919 |
| H  | -4.57284 | -1.89483  | -0.211537 |
| C  | -2.61592 | -1.01992  | -0.458277 |
| H  | -2.15523 | -1.94268  | -0.785655 |
| C  | -1.87439 | 0.153962  | -0.357743 |
| C  | -2.53461 | 1.30415   | 0.059200  |
| H  | -2.00898 | 2.245976  | 0.146899  |
| C  | -3.88172 | 1.248747  | 0.358862  |
| H  | -4.43841 | 2.118179  | 0.684990  |
| C  | -0.39988 | 0.163888  | -0.63843  |
| H  | -0.09648 | 1.143479  | -1.012172 |
| H  | -0.16117 | -0.56957  | -1.41078  |
| N  | 4.574438 | -0.11153  | -0.259292 |
| C  | 3.958132 | 1.005244  | 0.143919  |
| H  | 4.572838 | 1.89483   | 0.211537  |
| C  | 2.615923 | 1.01992   | 0.458277  |
| H  | 2.155226 | 1.942676  | 0.785655  |
| C  | 1.874386 | -0.15396  | 0.357743  |
| C  | 2.534611 | -1.304150 | -0.0592   |
| H  | 2.008984 | -2.24598  | -0.146899 |
| C  | 3.881722 | -1.24875  | -0.358862 |
| H  | 4.438408 | -2.11818  | -0.68499  |
| C  | 0.399878 | -0.16389  | 0.63843   |
| H  | 0.096481 | -1.14348  | 1.012172  |
| H  | 0.161165 | 0.56957   | 1.41078   |
| Ga | 6.570603 | 0.02648   | -0.725175 |
| Cl | 7.079165 | -2.01522  | -1.265982 |
| Cl | 7.396555 | 0.790092  | 1.132676  |
| Cl | 6.525671 | 1.483301  | -2.337121 |

(GaBr<sub>3</sub>)<sub>2</sub>(bpa) (C<sub>i</sub>)

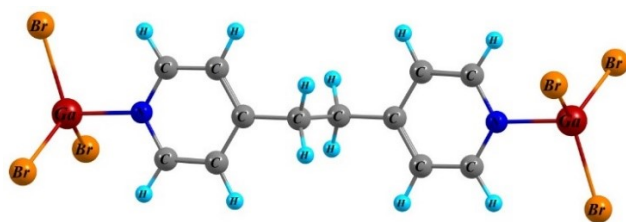

|    | X         | Y         | Z         |
|----|-----------|-----------|-----------|
| Ga | 6.600223  | 0.039404  | 0.457964  |
| Br | 7.247050  | 2.275364  | 0.425667  |
| Br | 7.133147  | -1.176793 | 2.371997  |
| Br | 6.864575  | -1.148856 | -1.529697 |
| N  | 4.544423  | 0.126573  | 0.590023  |
| C  | 3.889727  | -1.036022 | 0.692839  |
| H  | 4.501301  | -1.929661 | 0.729170  |
| C  | 2.513892  | -1.091333 | 0.753599  |
| H  | 2.023015  | -2.051614 | 0.842080  |
| C  | 1.776094  | 0.088357  | 0.708698  |
| C  | 2.474967  | 1.285388  | 0.605202  |
| H  | 1.953465  | 2.233044  | 0.574403  |
| C  | 3.854995  | 1.269251  | 0.548387  |
| H  | 4.439737  | 2.177148  | 0.470095  |
| C  | 0.275405  | 0.062794  | 0.717337  |
| H  | -0.112061 | 0.975380  | 1.173770  |
| H  | -0.080857 | -0.778660 | 1.314460  |
| N  | -4.544423 | -0.126573 | -0.590023 |
| C  | -3.889727 | 1.036022  | -0.692839 |
| H  | -4.501301 | 1.929661  | -0.729170 |
| C  | -2.513892 | 1.091333  | -0.753599 |
| H  | -2.023015 | 2.051614  | -0.842080 |
| C  | -1.776094 | -0.088357 | -0.708698 |
| C  | -2.474967 | -1.285388 | -0.605202 |
| H  | -1.953465 | -2.233044 | -0.574403 |
| C  | -3.854995 | -1.269251 | -0.548387 |
| H  | -4.439737 | -2.177148 | -0.470095 |
| C  | -0.275405 | -0.062794 | -0.717337 |
| H  | 0.112061  | -0.975380 | -1.173770 |
| H  | 0.080857  | 0.778660  | -1.314460 |
| Ga | -6.600223 | -0.039404 | -0.457964 |
| Br | -7.247050 | -2.275364 | -0.425667 |
| Br | -7.133147 | 1.176793  | -2.371997 |
| Br | -6.864575 | 1.148856  | 1.529697  |

AlCl<sub>3</sub>bpa (C<sub>1</sub>)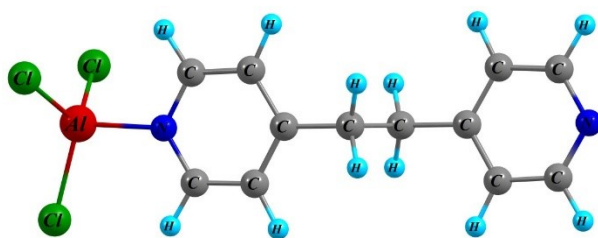

|    | X        | Y         | Z         |
|----|----------|-----------|-----------|
| Al | -3.81364 | -0.00235  | 0.117779  |
| Cl | -4.39343 | 2.016252  | 0.357857  |
| Cl | -4.48636 | -0.9529   | -1.64606  |
| Cl | -3.95943 | -1.21687  | 1.842447  |
| N  | -1.86589 | 0.087132  | -0.169035 |
| C  | -1.21916 | -1.07475  | -0.337088 |
| H  | -1.82753 | -1.97047  | -0.299208 |
| C  | 0.140608 | -1.1283   | -0.550910 |
| H  | 0.620856 | -2.08838  | -0.686624 |
| C  | 0.877725 | 0.052235  | -0.600559 |
| C  | 0.189978 | 1.24796   | -0.422379 |
| H  | 0.710694 | 2.196132  | -0.455213 |
| C  | -1.17348 | 1.231103  | -0.210117 |
| H  | -1.74637 | 2.138457  | -0.069681 |
| C  | 2.365068 | 0.033992  | -0.787493 |
| H  | 2.679846 | 0.913053  | -1.353404 |
| H  | 2.659513 | -0.84725  | -1.360272 |
| N  | 7.350245 | -0.03377  | -0.063647 |
| C  | 6.671961 | 1.10817   | -0.009689 |
| H  | 7.250075 | 2.016513  | -0.142645 |
| C  | 5.303491 | 1.178233  | 0.20697   |
| H  | 4.808864 | 2.141646  | 0.248477  |
| C  | 4.583952 | 0.002284  | 0.380217  |
| C  | 5.290661 | -1.192025 | 0.323487  |
| H  | 4.786794 | -2.14168  | 0.458586  |
| C  | 6.660505 | -1.15722  | 0.102688  |
| H  | 7.229636 | -2.07983  | 0.061622  |
| C  | 3.093013 | 0.021449  | 0.570165  |
| H  | 2.775967 | -0.85464  | 1.139928  |
| H  | 2.79922  | 0.904448  | 1.142177  |

AlBr<sub>3</sub>bpa (C<sub>1</sub>)

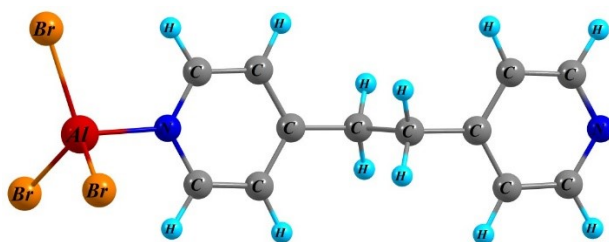

|    | X        | Y         | Z         |
|----|----------|-----------|-----------|
| Al | -2.72023 | 0.014225  | 0.054431  |
| Br | -3.42883 | 2.182774  | 0.006651  |
| Br | -3.41944 | -1.28838  | -1.684752 |
| Br | -2.86039 | -1.01919  | 2.085185  |
| N  | -0.77093 | 0.103882  | -0.239789 |
| C  | -0.106   | -1.06102  | -0.271480 |
| H  | -0.7016  | -1.95545  | -0.132611 |
| C  | 1.254402 | -1.11835  | -0.473651 |
| H  | 1.74872  | -2.0807   | -0.498733 |
| C  | 1.976287 | 0.05965   | -0.653569 |
| C  | 1.27153  | 1.257135  | -0.614318 |
| H  | 1.777733 | 2.203515  | -0.751713 |
| C  | -0.09337 | 1.244768  | -0.408410 |
| H  | -0.67853 | 2.154339  | -0.377922 |
| C  | 3.46461  | 0.037053  | -0.830865 |
| H  | 3.786302 | 0.911749  | -1.399014 |
| H  | 3.759493 | -0.84861  | -1.39718  |
| N  | 8.445074 | 0.0005    | -0.074422 |
| C  | 7.775083 | 1.137088  | 0.083379  |
| H  | 8.36145  | 2.048872  | 0.043301  |
| C  | 6.404861 | 1.197895  | 0.295327  |
| H  | 5.917683 | 2.157166  | 0.424291  |
| C  | 5.675688 | 0.016991  | 0.351386  |
| C  | 6.37433  | -1.172627 | 0.186648  |
| H  | 5.861683 | -2.12656  | 0.2278    |
| C  | 7.745412 | -1.12855  | -0.020959 |
| H  | 8.307621 | -2.04773  | -0.146892 |
| C  | 4.18347  | 0.026889  | 0.531746  |
| H  | 3.867958 | -0.85268  | 1.09743   |
| H  | 3.880776 | 0.906557  | 1.103763  |



**GaCl<sub>3</sub>bpa (C<sub>1</sub>)**

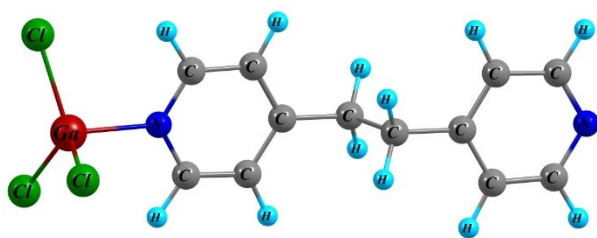

|    | <b>X</b> | <b>Y</b>  | <b>Z</b>  |
|----|----------|-----------|-----------|
| Ga | -3.46929 | -0.00218  | 0.108095  |
| Cl | -4.09922 | 2.01056   | -0.422507 |
| Cl | -4.12999 | -1.60996  | -1.200902 |
| Cl | -3.53829 | -0.48111  | 2.225859  |
| N  | -1.45686 | 0.044115  | -0.265913 |
| C  | -0.79989 | -1.11247  | -0.406926 |
| H  | -1.40271 | -2.01184  | -0.375830 |
| C  | 0.565112 | -1.15353  | -0.598134 |
| H  | 1.057607 | -2.10988  | -0.715962 |
| C  | 1.290184 | 0.033518  | -0.650824 |
| C  | 0.587709 | 1.224893  | -0.497845 |
| H  | 1.099377 | 2.177871  | -0.535211 |
| C  | -0.7787  | 1.195487  | -0.308021 |
| H  | -1.3652  | 2.099031  | -0.195439 |
| C  | 2.780411 | 0.027203  | -0.816221 |
| H  | 3.097598 | 0.911386  | -1.372639 |
| H  | 3.088849 | -0.84882  | -1.389791 |
| N  | 7.754663 | -0.02167  | -0.028151 |
| C  | 7.072755 | 1.117355  | 0.039097  |
| H  | 7.650269 | 2.029439  | -0.068307 |
| C  | 5.701336 | 1.18008   | 0.239331  |
| H  | 5.203801 | 2.141394  | 0.292728  |
| C  | 4.982763 | -0.00058  | 0.381233  |
| C  | 5.693416 | -1.191930 | 0.31096   |
| H  | 5.190327 | -2.14519  | 0.42194   |
| C  | 7.065752 | -1.14977  | 0.108036  |
| H  | 7.637669 | -2.07016  | 0.056729  |
| C  | 3.489328 | 0.010835  | 0.551286  |
| H  | 3.168611 | -0.86998  | 1.111721  |
| H  | 3.183626 | 0.889233  | 1.124085  |

GaBr<sub>3</sub>bpa (C<sub>1</sub>)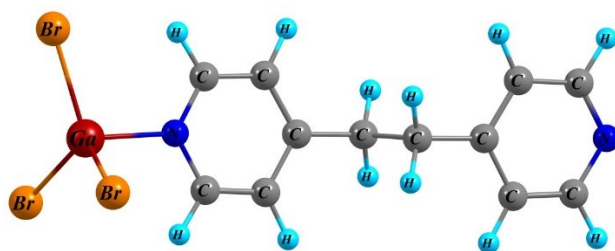

|    | X        | Y         | Z         |
|----|----------|-----------|-----------|
| Ga | -2.55262 | 0.013439  | 0.054165  |
| Br | -3.2404  | 2.236746  | -0.045126 |
| Br | -3.25337 | -1.36913  | -1.68771  |
| Br | -2.63006 | -1.00039  | 2.153854  |
| N  | -0.52758 | 0.101603  | -0.273626 |
| C  | 0.137938 | -1.06005  | -0.291012 |
| H  | -0.45535 | -1.95457  | -0.140942 |
| C  | 1.499771 | -1.11341  | -0.491047 |
| H  | 1.999633 | -2.07323  | -0.504261 |
| C  | 2.21587  | 0.066344  | -0.681323 |
| C  | 1.505683 | 1.261315  | -0.657988 |
| H  | 2.008462 | 2.208212  | -0.804501 |
| C  | 0.139854 | 1.243905  | -0.454284 |
| H  | -0.45177 | 2.150403  | -0.434506 |
| C  | 3.705495 | 0.047484  | -0.851095 |
| H  | 4.029661 | 0.927121  | -1.410089 |
| H  | 4.004192 | -0.83305  | -1.423522 |
| N  | 8.682363 | -0.00292  | -0.062345 |
| C  | 8.015153 | 1.132579  | 0.113659  |
| H  | 8.604962 | 2.042805  | 0.095613  |
| C  | 6.643648 | 1.194049  | 0.317389  |
| H  | 6.15873  | 2.152203  | 0.461983  |
| C  | 5.910044 | 0.014917  | 0.344528  |
| C  | 6.605907 | -1.173691 | 0.160895  |
| H  | 6.089538 | -2.12632  | 0.179146  |
| C  | 7.97843  | -1.1304   | -0.036442 |
| H  | 8.538342 | -2.04882  | -0.177358 |
| C  | 4.416721 | 0.025625  | 0.515213  |
| H  | 4.096726 | -0.85808  | 1.071944  |
| H  | 4.111538 | 0.900891  | 1.092597  |

**Fig. S31.** Optimized structures and xyz coordinates for protonated ligands. M06-2X/def2-TZVPPD level of theory.

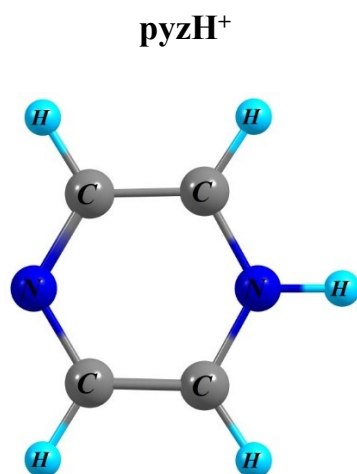

|   | <b>X</b> | <b>Y</b>  | <b>Z</b>  |
|---|----------|-----------|-----------|
| N | 0.000000 | 0.000000  | -1.284324 |
| N | 0.000000 | 0.000000  | 1.417441  |
| C | 0.000000 | 1.172597  | -0.641748 |
| C | 0.000000 | -1.172597 | -0.641748 |
| C | 0.000000 | -1.142986 | 0.743381  |
| C | 0.000000 | 1.142986  | 0.743381  |
| H | 0.000000 | 2.074909  | -1.234687 |
| H | 0.000000 | -2.074909 | -1.234687 |
| H | 0.000000 | -2.064975 | 1.309485  |
| H | 0.000000 | 2.064975  | 1.309485  |
| H | 0.000000 | 0.000000  | -2.301017 |

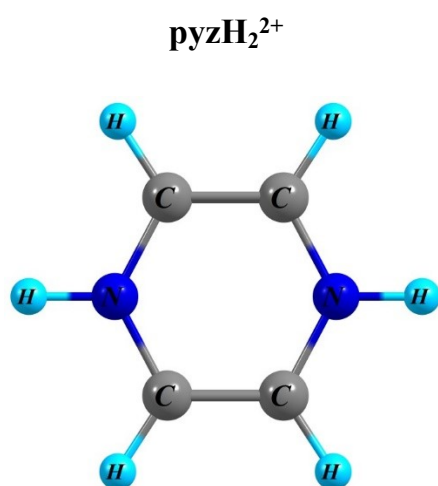

|   | <b>X</b> | <b>Y</b>  | <b>Z</b>  |
|---|----------|-----------|-----------|
| N | 0.000000 | 0.000000  | 1.321152  |
| N | 0.000000 | 0.000000  | -1.321152 |
| C | 0.000000 | 1.181111  | 0.694034  |
| C | 0.000000 | -1.181111 | 0.694034  |
| C | 0.000000 | -1.181111 | -0.694034 |
| C | 0.000000 | 1.181111  | -0.694034 |
| H | 0.000000 | 2.088802  | 1.286544  |
| H | 0.000000 | -2.088802 | 1.286544  |
| H | 0.000000 | -2.088802 | -1.286544 |
| H | 0.000000 | 2.088802  | -1.286544 |
| H | 0.000000 | 0.000000  | 2.348195  |
| H | 0.000000 | 0.000000  | -2.348195 |

**bipyH<sup>+</sup>**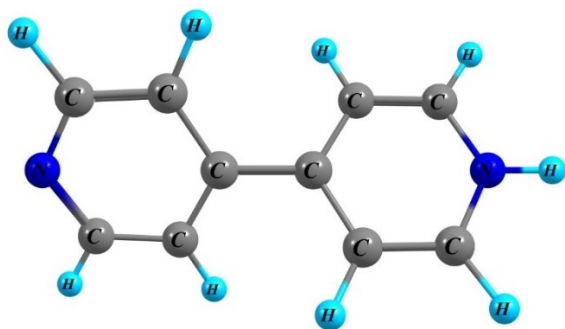

|   | X         | Y         | Z         |
|---|-----------|-----------|-----------|
| C | 0.000000  | 0.000000  | 0.786647  |
| C | 0.000000  | 0.000000  | -0.684439 |
| N | 0.000000  | 0.000000  | -3.423026 |
| C | 0.001164  | 1.201052  | -1.406663 |
| C | -0.001164 | -1.201052 | -1.406663 |
| C | 0.000000  | -1.178366 | -2.777060 |
| C | 0.000000  | 1.178366  | -2.777060 |
| H | -0.022125 | 2.153369  | -0.898144 |
| H | 0.022125  | -2.153369 | -0.898144 |
| H | 0.008430  | -2.067896 | -3.389122 |
| H | -0.008430 | 2.067896  | -3.389122 |
| N | 0.000000  | 0.000000  | 3.569171  |
| C | -0.662830 | -0.995396 | 1.499983  |
| C | 0.662830  | 0.995396  | 1.499983  |
| C | 0.639283  | 0.942935  | 2.886498  |
| C | -0.639283 | -0.942935 | 2.886498  |
| H | -1.219198 | -1.776922 | 1.000632  |
| H | 1.219198  | 1.776922  | 1.000632  |
| H | 1.159300  | 1.692623  | 3.469946  |
| H | -1.159300 | -1.692623 | 3.469946  |
| H | 0.000000  | 0.000000  | -4.435995 |

**bipyH<sub>2</sub><sup>2+</sup>**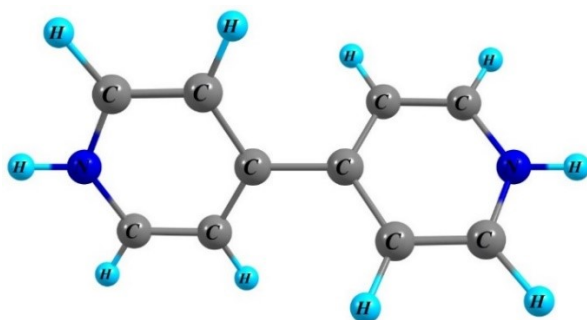

|   | X         | Y         | Z         |
|---|-----------|-----------|-----------|
| C | 0.000000  | 0.000000  | 0.743932  |
| C | 0.000000  | 0.000000  | -0.743932 |
| N | 0.000000  | 0.000000  | -3.464756 |
| C | -0.437439 | 1.121358  | -1.450364 |
| C | 0.437439  | -1.121358 | -1.450364 |
| C | 0.432837  | -1.097384 | -2.827408 |
| C | -0.432837 | 1.097384  | -2.827408 |
| H | -0.804156 | 2.004219  | -0.945943 |
| H | 0.804156  | -2.004219 | -0.945943 |
| H | 0.765547  | -1.923033 | -3.440524 |
| H | -0.765547 | 1.923033  | -3.440524 |
| N | 0.000000  | 0.000000  | 3.464756  |
| C | -0.437439 | -1.121358 | 1.450364  |
| C | 0.437439  | 1.121358  | 1.450364  |
| C | 0.432837  | 1.097384  | 2.827408  |
| C | -0.432837 | -1.097384 | 2.827408  |
| H | -0.804156 | -2.004219 | 0.945943  |
| H | 0.804156  | 2.004219  | 0.945943  |
| H | 0.765547  | 1.923033  | 3.440524  |
| H | -0.765547 | -1.923033 | 3.440524  |
| H | 0.000000  | 0.000000  | 4.482003  |
| H | 0.000000  | 0.000000  | -4.482003 |

bpeH<sup>+</sup>

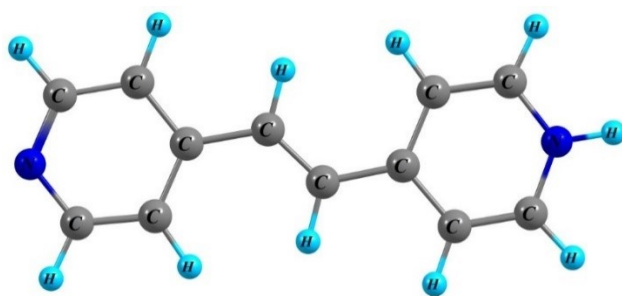

|   | X         | Y         | Z        |
|---|-----------|-----------|----------|
| C | 0.000000  | 0.663403  | 0.000000 |
| C | -1.254457 | 1.382095  | 0.000000 |
| N | -3.579403 | 2.860039  | 0.000000 |
| C | -2.519610 | 0.760777  | 0.000000 |
| C | -1.234027 | 2.790221  | 0.000000 |
| C | -2.399208 | 3.505399  | 0.000000 |
| C | -3.657986 | 1.514682  | 0.000000 |
| H | -2.622220 | -0.312935 | 0.000000 |
| H | -0.294046 | 3.322543  | 0.000000 |
| H | -2.435557 | 4.584536  | 0.000000 |
| H | -4.650403 | 1.089483  | 0.000000 |
| C | 0.115763  | -0.675071 | 0.000000 |
| H | 0.888978  | 1.280808  | 0.000000 |
| C | 1.360995  | -1.432799 | 0.000000 |
| H | -0.779474 | -1.287898 | 0.000000 |
| N | 3.679480  | -2.988494 | 0.000000 |
| C | 2.625411  | -0.840416 | 0.000000 |
| C | 1.297850  | -2.824883 | 0.000000 |
| C | 2.479488  | -3.553926 | 0.000000 |
| C | 3.741973  | -1.658097 | 0.000000 |
| H | 2.755081  | 0.232379  | 0.000000 |
| H | 0.344113  | -3.336124 | 0.000000 |
| H | 2.455464  | -4.636755 | 0.000000 |
| H | 4.734931  | -1.225699 | 0.000000 |
| H | -4.434568 | 3.400544  | 0.000000 |
| C | 0.000000  | 0.663403  | 0.000000 |

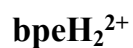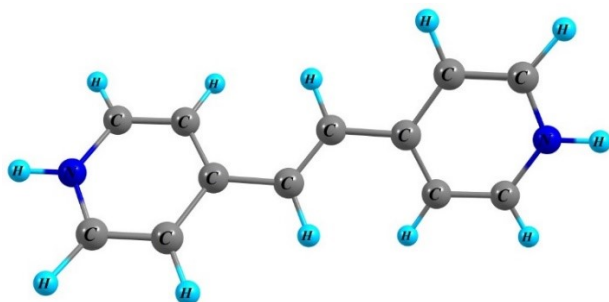

|   | X         | Y         | Z         |
|---|-----------|-----------|-----------|
| C | -0.401398 | 0.533758  | 0.039863  |
| C | -1.868986 | 0.474299  | 0.024442  |
| N | -4.602135 | 0.454546  | -0.041422 |
| C | -2.587395 | -0.665501 | 0.406426  |
| C | -2.587395 | 1.607052  | -0.374625 |
| C | -3.961177 | 1.575037  | -0.405500 |
| C | -3.959483 | -0.653391 | 0.363297  |
| H | -2.093801 | -1.557879 | 0.760962  |
| H | -2.080340 | 2.515065  | -0.668421 |
| H | -4.572105 | 2.412694  | -0.709455 |
| H | -4.572553 | -1.496212 | 0.647604  |
| C | 0.401398  | -0.533758 | 0.039863  |
| H | 0.017817  | 1.532672  | 0.000556  |
| C | 1.868986  | -0.474299 | 0.024442  |
| H | -0.017817 | -1.532672 | 0.000556  |
| N | 4.602135  | -0.454546 | -0.041422 |
| C | 2.587395  | 0.665501  | 0.406426  |
| C | 2.587395  | -1.607052 | -0.374625 |
| C | 3.961177  | -1.575037 | -0.405500 |
| C | 3.959483  | 0.653391  | 0.363297  |
| H | 2.093801  | 1.557879  | 0.760962  |
| H | 2.080340  | -2.515065 | -0.668421 |
| H | 4.572105  | -2.412694 | -0.709455 |
| H | 4.572553  | 1.496212  | 0.647604  |
| H | -5.617288 | 0.445801  | -0.064717 |
| H | 5.617288  | -0.445801 | -0.064717 |
| C | -0.401398 | 0.533758  | 0.039863  |

bpaH<sup>+</sup>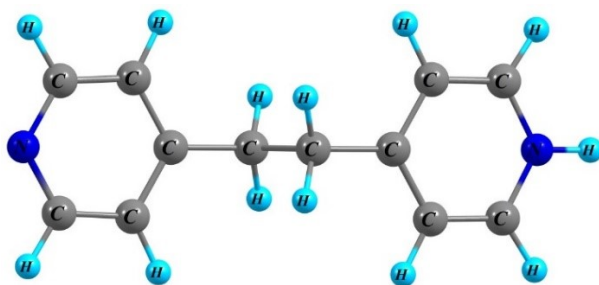

|   | X         | Y         | Z         |
|---|-----------|-----------|-----------|
| C | 0.276393  | 2.517013  | 1.199451  |
| C | 0.276393  | 2.517013  | -1.199451 |
| C | 0.423135  | 1.811859  | 0.000000  |
| C | 0.004770  | 3.861118  | 1.179004  |
| N | -0.122455 | 4.493167  | 0.000000  |
| C | 0.004770  | 3.861118  | -1.179004 |
| C | 0.669706  | 0.339931  | 0.000000  |
| H | 1.244462  | 0.056071  | -0.881845 |
| H | 1.244462  | 0.056071  | 0.881845  |
| H | 0.382670  | 2.014985  | -2.150810 |
| H | -0.113710 | 4.463312  | -2.067492 |
| H | -0.113710 | 4.463312  | 2.067492  |
| H | 0.382670  | 2.014985  | 2.150810  |
| C | -0.670609 | -0.432765 | 0.000000  |
| C | -0.417578 | -1.916108 | 0.000000  |
| H | -1.249756 | -0.148592 | 0.880636  |
| H | -1.249756 | -0.148592 | -0.880636 |
| C | -0.273951 | -2.618521 | -1.188803 |
| C | -0.273951 | -2.618521 | 1.188803  |
| C | 0.004770  | -3.977774 | -1.136009 |
| H | -0.386909 | -2.125596 | -2.146527 |
| C | 0.004770  | -3.977774 | 1.136009  |
| H | -0.386909 | -2.125596 | 2.146527  |
| N | 0.145546  | -4.651718 | 0.000000  |
| H | 0.115978  | -4.548423 | -2.050388 |
| H | 0.115978  | -4.548423 | 2.050388  |
| H | -0.318815 | 5.486815  | 0.000000  |
| C | 0.276393  | 2.517013  | 1.199451  |

**bpaH<sub>2</sub><sup>2+</sup>**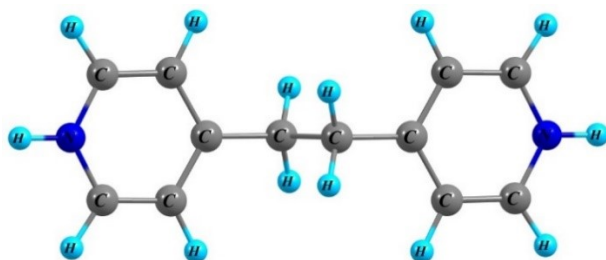

|   | <b>X</b>  | <b>Y</b>  | <b>Z</b>  |
|---|-----------|-----------|-----------|
| C | 0.152261  | 2.595853  | 1.198988  |
| C | 0.152261  | 2.595853  | -1.198988 |
| C | 0.314412  | 1.898869  | 0.000000  |
| C | -0.152261 | 3.936462  | 1.178587  |
| N | -0.294225 | 4.562039  | 0.000000  |
| C | -0.152261 | 3.936462  | -1.178587 |
| C | 0.642815  | 0.430327  | 0.000000  |
| H | 1.241460  | 0.192263  | -0.880041 |
| H | 1.241460  | 0.192263  | 0.880041  |
| H | 0.277963  | 2.104923  | -2.153938 |
| H | -0.281607 | 4.535782  | -2.068166 |
| H | -0.281607 | 4.535782  | 2.068166  |
| H | 0.277963  | 2.104923  | 2.153938  |
| C | -0.152261 | -2.595853 | -1.198988 |
| C | -0.152261 | -2.595853 | 1.198988  |
| C | -0.314412 | -1.898869 | 0.000000  |
| C | 0.152261  | -3.936462 | -1.178587 |
| N | 0.294225  | -4.562039 | 0.000000  |
| C | 0.152261  | -3.936462 | 1.178587  |
| C | -0.642815 | -0.430327 | 0.000000  |
| H | -1.241460 | -0.192263 | 0.880041  |
| H | -1.241460 | -0.192263 | -0.880041 |
| H | -0.277963 | -2.104923 | 2.153938  |
| H | 0.281607  | -4.535782 | 2.068166  |
| H | 0.281607  | -4.535782 | -2.068166 |
| H | -0.277963 | -2.104923 | -2.153938 |
| H | -0.511908 | 5.553742  | 0.000000  |
| H | 0.511908  | -5.553742 | 0.000000  |
| C | 0.152261  | 2.595853  | 1.198988  |
